# Supplementary material for: A Study of the Bisphosphonic Derivatives from the Pudovik Reaction of Dialkyl α-Oxophosphonates and >P(O)H Reagents: X-ray Structure and Bioactivity
Source: MDPI journal article supplement (doi:10.3390/molecules28166037), 2023-08-12

# Supplementary Materials

## A Study on Bisphosphonic Derivatives Coming from the Pudovik Reaction of Dialkyl $\alpha$ -Oxophosphonates and $>\text{P}(\text{O})\text{H}$ Reagents: X-Ray Structure and Bioactivity

Zsuzsanna Szalai,<sup>1</sup> Boldizsár Tóth,<sup>1</sup> Rita Oláhné Szabó,<sup>2,3</sup> Szilvia Bősze,<sup>2</sup> László Drahos,<sup>4</sup> Konstantin Karaghiosoff,<sup>5</sup> Mátyás Czugler<sup>1</sup> and György Keglevich<sup>1</sup>

<sup>1</sup>Department of Organic Chemistry and Technology, Faculty of Chemical Technology and Biotechnology, Budapest University of Technology and Economics, 1521 Budapest, Hungary

<sup>2</sup>Eötvös Loránd Research Network (ELKH), Research Group of Peptide Chemistry, Eötvös Loránd University, 1117 Budapest, Hungary

<sup>3</sup>Department of Genetics, Cell-and Immunobiology, Semmelweis University, Nagyvárad tér 4, 1089 Budapest,

<sup>4</sup>MS Proteomics Research Group, Research Centre for Natural Sciences, 1117 Budapest, Hungary

<sup>5</sup>Department Chemie, Ludwig-Maximilians-Universität München, Butenandtstr. 5-13, D-81377 München, Germany

## Contents

|                                                                                                              |   |
|--------------------------------------------------------------------------------------------------------------|---|
| 1. Geometrical data for compounds 2d, 2e and 6 obtained from the X-ray measurements....                      | 2 |
| 2. Spectra of the compounds 2a-f, 3a, 3b-1 + 3b-2, 3c-1 + 3c-2, 5d-1 + 5d-2, 5e-1 and 5f-1 synthesized ..... | 5 |

**1. Geometrical data for compounds 2d, 2e and 6 obtained from the X-ray measurements**

**SI Table S1.** Selected bond lengths (Å) of compound **2d**, **2e** and **6**.

| <b>2d</b>        |          | <b>2e</b>         |          | <b>6</b>         |          |
|------------------|----------|-------------------|----------|------------------|----------|
| <b>P1 – O1</b>   | 1.493(1) | <b>P1 – O1</b>    | 1.485(1) | <b>P1 – O1</b>   | 1.488(1) |
| <b>P1 – C7</b>   | 1.801(2) | <b>P1 – C1</b>    | 1.809(2) | <b>P1 – C7</b>   | 1.807(1) |
| <b>P1 – C1</b>   | 1.811(2) | <b>P1 – C8</b>    | 1.809(2) | <b>P1 – C1</b>   | 1.809(1) |
| <b>P1 – C13</b>  | 1.863(2) | <b>P1 – C15</b>   | 1.862(2) | <b>P1 – C13</b>  | 1.860(1) |
| <b>P2 – O5</b>   | 1.463(1) | <b>C1 – C2</b>    | 1.393(2) | <b>P2 – O5</b>   | 1.476(1) |
| <b>P2 – O3</b>   | 1.572(1) | <b>C1 – C6</b>    | 1.396(2) | <b>P2 – O3</b>   | 1.568(1) |
| <b>P2 – O4</b>   | 1.574(1) | <b>O4A – C17A</b> | 1.425(5) | <b>P2 – O4</b>   | 1.570(1) |
| <b>P2 – C13</b>  | 1.831(2) | <b>O4A – P2</b>   | 1.524(2) | <b>P2 – C13</b>  | 1.841(1) |
| <b>O4 – C16</b>  | 1.438(2) | <b>P2 – O3</b>    | 1.466(1) | <b>O3 – C15</b>  | 1.457(1) |
| <b>O2 – C13</b>  | 1.424(2) | <b>P2 – O5A</b>   | 1.642(3) | <b>O4 – C17</b>  | 1.464(1) |
| <b>C7 – C8</b>   | 1.398(2) | <b>P2 – C15</b>   | 1.834(2) | <b>C1 – C2</b>   | 1.394(1) |
| <b>C7 – C12</b>  | 1.400(2) | <b>O2 – C15</b>   | 1.424(2) | <b>C1 – C6</b>   | 1.398(1) |
| <b>C12 – C11</b> | 1.389(2) | <b>C2 – C3</b>    | 1.385(2) | <b>O2 – C13</b>  | 1.427(1) |
| <b>C5 – C4</b>   | 1.384(3) | <b>O5A – C18A</b> | 1.415(7) | <b>C8 – C9</b>   | 1.395(2) |
| <b>C5 – C6</b>   | 1.391(2) | <b>C4 – C3</b>    | 1.394(3) | <b>C2 – C3</b>   | 1.390(2) |
| <b>C8 – C9</b>   | 1.390(2) | <b>C4 – C7</b>    | 1.512(2) | <b>C17 – C18</b> | 1.490(2) |
| <b>C11 – C10</b> | 1.386(3) | <b>C5 – C6</b>    | 1.391(2) | <b>C9 – C10</b>  | 1.385(2) |
| <b>C10 – C9</b>  | 1.384(3) | <b>O6 – C20</b>   | 1.176(4) | <b>C15 – C16</b> | 1.495(2) |
| <b>O3 – C15</b>  | 1.440(2) | <b>C15 – C16</b>  | 1.528(2) | <b>C10 – C11</b> | 1.389(2) |
| <b>C1 – C6</b>   | 1.390(2) | <b>C8 – C13</b>   | 1.389(2) | <b>C13 – C14</b> | 1.536(1) |
| <b>C1 – C2</b>   | 1.403(2) | <b>C8 – C9</b>    | 1.397(2) | <b>C7 – C12</b>  | 1.396(2) |
| <b>C14 – C13</b> | 1.535(2) | <b>C19 – C20</b>  | 1.482(3) | <b>C7 – C8</b>   | 1.397(2) |
| <b>C3 – C4</b>   | 1.385(3) | <b>C9 – C10</b>   | 1.390(2) | <b>C6 – C5</b>   | 1.392(2) |
| <b>C3 – C2</b>   | 1.385(2) | <b>C10 – C11</b>  | 1.391(2) | <b>C5 – C4</b>   | 1.392(2) |
|                  |          | <b>C11 – C12</b>  | 1.391(2) | <b>C4 – C3</b>   | 1.384(2) |
|                  |          | <b>C11 – C14</b>  | 1.511(2) | <b>C12 – C11</b> | 1.387(2) |
|                  |          | <b>C12 – C13</b>  | 1.388(2) |                  |          |
|                  |          | <b>C4 – C5</b>    | 1.389(3) |                  |          |

**SI Table S2.** Selected bond angles (°) of compound **2d**, **2e** and **6**.

| <b>2d</b>              |          | <b>2e</b><br>(i = 1-x, y, 0.5-z; acetone<br>molecule) |          | <b>6</b>               |          |
|------------------------|----------|-------------------------------------------------------|----------|------------------------|----------|
| <b>O1 – P1 – C7</b>    | 112.0(1) | <b>O1 – P1 – C1</b>                                   | 112.2(1) | <b>O1 – P1 – C7</b>    | 112.1(1) |
| <b>O1 – P1 – C1</b>    | 111.9(1) | <b>O1 – P1 – C8</b>                                   | 111.3(1) | <b>O1 – P1 – C1</b>    | 112.3(1) |
| <b>C7 – P1 – C1</b>    | 107.1(1) | <b>C1 – P1 – C8</b>                                   | 107.4(1) | <b>C7 – P1 – C1</b>    | 105.3(1) |
| <b>O1 – P1 – C13</b>   | 111.4(1) | <b>O1 – P1 – C15</b>                                  | 111.7(1) | <b>O1 – P1 – C13</b>   | 111.2(1) |
| <b>C7 – P1 – C13</b>   | 109.5(1) | <b>C1 – P1 – C15</b>                                  | 108.2(1) | <b>C7 – P1 – C13</b>   | 104.6(1) |
| <b>C1 – P1 – C13</b>   | 104.6(1) | <b>C8 – P1 – C15</b>                                  | 105.8(1) | <b>C1 – P1 – C13</b>   | 111.0(1) |
| <b>O5 – P2 – O3</b>    | 116.5(1) | <b>C2 – C1 – C6</b>                                   | 118.7(2) | <b>O5 – P2 – O3</b>    | 115.9(1) |
| <b>O5 – P2 – O4</b>    | 114.1(1) | <b>C2 – C1 – P1</b>                                   | 124.3(1) | <b>O5 – P2 – O4</b>    | 109.2(1) |
| <b>O3 – P2 – O4</b>    | 102.3(1) | <b>C6 – C1 – P1</b>                                   | 117.0(1) | <b>O3 – P2 – O4</b>    | 107.7(1) |
| <b>O5 – P2 – C13</b>   | 115.4(1) | <b>C17A – O4A – P2</b>                                | 121.8(4) | <b>O5 – P2 – C13</b>   | 111.1(1) |
| <b>O3 – P2 – C13</b>   | 101.7(1) | <b>O3 – P2 – O4A</b>                                  | 118.3(1) | <b>O3 – P2 – C13</b>   | 103.1(1) |
| <b>O4 – P2 – C13</b>   | 105.1(1) | <b>O3 – P2 – O5A</b>                                  | 111.3(1) | <b>O4 – P2 – C13</b>   | 109.6(1) |
| <b>C16 – O4 – P2</b>   | 122.4(1) | <b>O4A – P2 – O5A</b>                                 | 101.4(2) | <b>C15 – O3 – P2</b>   | 123.0(1) |
| <b>C8 – C7 – C12</b>   | 119.6(2) | <b>O3 – P2 – C15</b>                                  | 113.2(1) | <b>C17 – O4 – P2</b>   | 125.0(1) |
| <b>C8 – C7 – P1</b>    | 116.4(1) | <b>O4A – P2 – C15</b>                                 | 109.7(1) | <b>C2 – C1 – C6</b>    | 119.3(1) |
| <b>C12 – C7 – P1</b>   | 123.9(1) | <b>O5A – P2 – C15</b>                                 | 100.8(1) | <b>C2 – C1 – P1</b>    | 115.3(1) |
| <b>C15 – O3 – P2</b>   | 118.6(1) | <b>C3 – C2 – C1</b>                                   | 120.5(2) | <b>C6 – C1 – P1</b>    | 125.4(1) |
| <b>C6 – C1 – C2</b>    | 119.1(2) | <b>C18A – O5A – P2</b>                                | 119.5(4) | <b>O2 – C13 – C14</b>  | 112.4(1) |
| <b>C6 – C1 – P1</b>    | 123.7(1) | <b>C5 – C4 – C3</b>                                   | 118.2(2) | <b>O2 – C13 – P2</b>   | 106.7(1) |
| <b>O2 – C13 – C14</b>  | 111.7(1) | <b>C5 – C4 – C7</b>                                   | 121.3(2) | <b>C4 – C3 – C2</b>    | 120.1(1) |
| <b>O2 – C13 – P2</b>   | 103.7(1) | <b>C3 – C4 – C7</b>                                   | 120.5(2) | <b>O4 – C17 – C18</b>  | 108.0(1) |
| <b>C14 – C13 – P2</b>  | 110.3(1) | <b>C2 – C3 – C4</b>                                   | 121.2(2) | <b>C10 – C9 – C8</b>   | 120.1(1) |
| <b>O2 – C13 – P1</b>   | 109.7(1) | <b>C4 – C5 – C6</b>                                   | 121.1(2) | <b>O3 – C15 – C16</b>  | 109.3(1) |
| <b>C14 – C13 – P1</b>  | 108.8(1) | <b>C5 – C6 – C1</b>                                   | 120.3(2) | <b>C9 – C10 – C11</b>  | 120.2(1) |
| <b>P2 – C13 – P1</b>   | 112.6(1) | <b>O2 – C15 – C16</b>                                 | 112.1(1) | <b>C12 – C11 – C10</b> | 120.0(1) |
| <b>C9 – C8 – C7</b>    | 119.9(2) | <b>O2 – C15 – P2</b>                                  | 108.2(1) | <b>C14 – C13 – P1</b>  | 107.2(1) |
| <b>C10 – C11 – C12</b> | 120.0(2) | <b>C16 – C15 – P2</b>                                 | 108.4(1) | <b>P2 – C13 – P1</b>   | 115.7(1) |
| <b>C9 – C10 – C11</b>  | 120.5(2) | <b>O2 – C15 – P1</b>                                  | 106.5(1) | <b>C12 – C7 – C8</b>   | 119.3(1) |
| <b>C1 – C6 – C5</b>    | 120.2(2) | <b>C16 – C15 – P1</b>                                 | 110.2(1) | <b>C12 – C7 – P1</b>   | 123.0(1) |
| <b>C5 – C4 – C3</b>    | 120.3(2) | <b>P2 – C15 – P1</b>                                  | 111.4(1) | <b>C8 – C7 – P1</b>    | 117.7(1) |
| <b>C10 – C9 – C8</b>   | 120.0(2) | <b>C13 – C8 – C9</b>                                  | 118.7(1) | <b>C5 – C6 – C1</b>    | 120.0(1) |
| <b>C10 – C9 – H9</b>   | 120.000  | <b>C13 – C8 – P1</b>                                  | 114.8(1) | <b>C6 – C5 – C4</b>    | 120.3(1) |
| <b>C4 – C5 – C6</b>    | 120.1(2) | <b>C9 – C8 – P1</b>                                   | 126.5(1) | <b>C3 – C4 – C5</b>    | 119.9(1) |
| <b>C3 – C2 – C1</b>    | 120.5(2) | <b>O6 – C20 – C19</b>                                 | 121.8(2) | <b>C11 – C12 – C7</b>  | 120.4(1) |
| <b>C2 – C1 – P1</b>    | 117.1(1) | <b>O6 – C20 – C19<sup>i</sup></b>                     | 121.8(2) | <b>C9 – C8 – C7</b>    | 120.0(1) |
| <b>C4 – C3 – C2</b>    | 119.8(2) | <b>C19 – C20 – C19<sup>i</sup></b>                    | 116.4(3) | <b>C3 – C2 – C1</b>    | 120.5(1) |
| <b>C11 – C12 – C7</b>  | 119.9(2) | <b>C10 – C9 – C8</b>                                  | 120.3(2) | <b>C14 – C13 – P2</b>  | 107.9(1) |
|                        |          | <b>C9 – C10 – C11</b>                                 | 120.9(2) | <b>O2 – C13 – P1</b>   | 107.1(1) |
|                        |          | <b>C12 – C11 – C10</b>                                | 118.7(2) |                        |          |
|                        |          | <b>C12 – C11 – C14</b>                                | 119.9(2) |                        |          |
|                        |          | <b>C10 – C11 – C14</b>                                | 121.4(2) |                        |          |
|                        |          | <b>C13 – C12 – C11</b>                                | 120.5(2) |                        |          |
|                        |          | <b>C12 – C13 – C8</b>                                 | 120.9(2) |                        |          |

**SI Table S3.** Selected torsion angles (°) of compound **2d**, **2e** and **6**.

| <b>2d</b>            |           | <b>2e</b>             |           | <b>6</b>             |           |
|----------------------|-----------|-----------------------|-----------|----------------------|-----------|
| O5 – P2 – O4 – C16   | -27.4(2)  | O1 – P1 – C1 – C2     | 174.2(1)  | O5 – P2 – O3 – C15   | -32.3(1)  |
| O3 – P2 – O4 – C16   | -154.1(2) | C8 – P1 – C1 – C2     | 51.6(2)   | O4 – P2 – O3 – C15   | 90.3(1)   |
| C13 – P2 – O4 – C16  | 100.1(2)  | C15 – P1 – C1 – C2    | -62.2(2)  | C13 – P2 – O3 – C15  | -153.9(1) |
| O1 – P1 – C7 – C8    | -11.0(2)  | O1 – P1 – C1 – C6     | -3.9(2)   | O5 – P2 – O4 – C17   | 145.3(1)  |
| C1 – P1 – C7 – C8    | 112.1(1)  | C8 – P1 – C1 – C6     | -126.5(1) | O3 – P2 – O4 – C17   | 18.7(1)   |
| C13 – P1 – C7 – C8   | -135.1(1) | C15 – P1 – C1 – C6    | 119.7(1)  | C13 – P2 – O4 – C17  | -92.8(1)  |
| O1 – P1 – C7 – C12   | 172.4(1)  | C17A – O4A – P2 – O3  | -25.6(5)  | O1 – P1 – C1 – C2    | -19.3(1)  |
| C1 – P1 – C7 – C12   | -64.6(2)  | C17A – O4A – P2 – O5A | -147.6(5) | C7 – P1 – C1 – C2    | 103.0(1)  |
| C13 – P1 – C7 – C12  | 48.3(2)   | C17A – O4A – P2 – C15 | 106.4(4)  | C13 – P1 – C1 – C2   | -144.4(1) |
| O5 – P2 – O3 – C15   | -56.5(2)  | C6 – C1 – C2 – C3     | -1.1(2)   | O1 – P1 – C1 – C6    | 163.5(1)  |
| O4 – P2 – O3 – C15   | 68.7(2)   | P1 – C1 – C2 – C3     | -179.2(1) | C7 – P1 – C1 – C6    | -74.3(1)  |
| C13 – P2 – O3 – C15  | 177.1(2)  | O3 – P2 – O5A – C18A  | -64.2(5)  | C13 – P1 – C1 – C6   | 38.4(1)   |
| O1 – P1 – C1 – C6    | 144.9(2)  | O4A – P2 – O5A – C18A | 62.5(5)   | O5 – P2 – C13 – O2   | -52.0(1)  |
| C7 – P1 – C1 – C6    | 21.9(2)   | C15 – P2 – O5A – C18A | 175.4(5)  | O3 – P2 – C13 – O2   | 72.8(1)   |
| C13 – P1 – C1 – C6   | -94.3(2)  | C1 – C2 – C3 – C4     | 1.2(3)    | O4 – P2 – C13 – O2   | -172.8(1) |
| O1 – P1 – C1 – C2    | -35.0(2)  | C5 – C4 – C3 – C2     | -0.5(3)   | O5 – P2 – C13 – C14  | 69.0(1)   |
| C7 – P1 – C1 – C2    | -158.1(1) | C7 – C4 – C3 – C2     | 179.0(2)  | O3 – P2 – C13 – C14  | -166.3(1) |
| C13 – P1 – C1 – C2   | 85.8(1)   | C3 – C4 – C5 – C6     | -0.2(3)   | O4 – P2 – C13 – C14  | -51.8(1)  |
| C8 – C7 – C12 – C11  | -2.5(2)   | C7 – C4 – C5 – C6     | -179.7(2) | O5 – P2 – C13 – P1   | -171.0(1) |
| P1 – C7 – C12 – C11  | 174.0(1)  | C4 – C5 – C6 – C1     | 0.3(3)    | O3 – P2 – C13 – P1   | -46.3(1)  |
| C4 – C3 – C2 – C1    | -0.7(3)   | C2 – C1 – C6 – C5     | 0.4(2)    | O4 – P2 – C13 – P1   | 68.2(1)   |
| C6 – C1 – C2 – C3    | 0.9(3)    | P1 – C1 – C6 – C5     | 178.6(1)  | O1 – P1 – C13 – O2   | 179.8(1)  |
| P1 – C1 – C2 – C3    | -179.2(1) | O3 – P2 – C15 – O2    | 44.3(1)   | C7 – P1 – C13 – O2   | 58.6(1)   |
| O5 – P2 – C13 – O2   | 56.1(1)   | O4A – P2 – C15 – O2   | -90.4(2)  | C1 – P1 – C13 – O2   | -54.5(1)  |
| O3 – P2 – C13 – O2   | -176.8(1) | O5A – P2 – C15 – O2   | 163.3(2)  | O1 – P1 – C13 – C14  | 59.0(1)   |
| O4 – P2 – C13 – O2   | -70.5(1)  | O4B – P2 – C15 – O2   | -63.0(3)  | C7 – P1 – C13 – C14  | -62.2(1)  |
| O5 – P2 – C13 – C14  | 175.9(1)  | O5B – P2 – C15 – C16  | 68.6(5)   | C1 – P1 – C13 – C14  | -175.3(1) |
| O3 – P2 – C13 – C14  | -57.0(1)  | C9 – C8 – C13 – C12   | 0.5(2)    | O1 – P1 – C13 – P2   | -61.4(1)  |
| O4 – P2 – C13 – C14  | 49.3(1)   | P1 – C8 – C13 – C12   | -180.0(1) | C7 – P1 – C13 – P2   | 177.4(1)  |
| O5 – P2 – C13 – P1   | -62.4(1)  | O3 – P2 – C15 – C16   | -77.5(1)  | C1 – P1 – C13 – P2   | 64.3(1)   |
| O3 – P2 – C13 – P1   | 64.7(1)   | O4A – P2 – C15 – C16  | 147.9(2)  | O1 – P1 – C7 – C12   | 164.6(1)  |
| O4 – P2 – C13 – P1   | 171.0(1)  | O5A – P2 – C15 – C16  | 41.5(2)   | C1 – P1 – C7 – C12   | 42.3(1)   |
| O1 – P1 – C13 – O2   | -179.5(1) | O3 – P2 – C15 – P1    | 161.0(1)  | C13 – P1 – C7 – C12  | -74.8(1)  |
| C7 – P1 – C13 – O2   | -55.1(1)  | O4A – P2 – C15 – P1   | 26.4(2)   | O1 – P1 – C7 – C8    | -13.7(1)  |
| C1 – P1 – C13 – O2   | 59.4(1)   | O5A – P2 – C15 – P1   | -80.0(2)  | C1 – P1 – C7 – C8    | -136.0(1) |
| O1 – P1 – C13 – C14  | 58.0(1)   | O1 – P1 – C15 – O2    | 163.7(1)  | C13 – P1 – C7 – C8   | 106.9(1)  |
| C7 – P1 – C13 – C14  | -177.6(1) | C1 – P1 – C15 – O2    | 39.8(1)   | C2 – C1 – C6 – C5    | 0.5(2)    |
| C1 – P1 – C13 – C14  | -63.1(1)  | C8 – P1 – C15 – O2    | -75.1(1)  | P1 – C1 – C6 – C5    | 177.6(1)  |
| O1 – P1 – C13 – P2   | -64.6(1)  | O1 – P1 – C15 – C16   | -74.5(1)  | C1 – C6 – C5 – C4    | 0.4(2)    |
| C7 – P1 – C13 – P2   | 59.9(1)   | C1 – P1 – C15 – C16   | 161.6(1)  | C6 – C5 – C4 – C3    | -1.0(2)   |
| C1 – P1 – C13 – P2   | 174.3(1)  | C8 – P1 – C15 – C16   | 46.7(1)   | C8 – C7 – C12 – C11  | -0.8(2)   |
| C12 – C7 – C8 – C9   | 1.6(2)    | O1 – P1 – C15 – P2    | 45.9(1)   | P1 – C7 – C12 – C11  | -179.1(1) |
| P1 – C7 – C8 – C9    | -175.1(1) | C1 – P1 – C15 – P2    | -78.0(1)  | C12 – C7 – C8 – C9   | 0.7(2)    |
| C7 – C12 – C11 – C10 | 1.3(3)    | C8 – P1 – C15 – P2    | 167.1(1)  | P1 – C7 – C8 – C9    | 179.1(1)  |
| C12 – C11 – C10 – C9 | 0.8(3)    | O1 – P1 – C8 – C13    | -7.4(2)   | C6 – C1 – C2 – C3    | -0.8(2)   |
| C2 – C1 – C6 – C5    | -0.6(3)   | C1 – P1 – C8 – C13    | 115.7(1)  | P1 – C1 – C2 – C3    | -178.2(1) |
| P1 – C1 – C6 – C5    | 179.5(1)  | C15 – P1 – C8 – C13   | -128.9(1) | C5 – C4 – C3 – C2    | 0.6(2)    |
| C4 – C5 – C6 – C1    | 0.1(3)    | O1 – P1 – C8 – C9     | 172.1(2)  | C1 – C2 – C3 – C4    | 0.3(2)    |
| C6 – C5 – C4 – C3    | 0.1(3)    | C1 – P1 – C8 – C9     | -64.7(2)  | P2 – O4 – C17 – C18  | 172.8(1)  |
| C2 – C3 – C4 – C5    | 0.2(3)    | C15 – P1 – C8 – C9    | 50.7(2)   | C7 – C8 – C9 – C10   | -0.1(2)   |
| C11 – C10 – C9 – C8  | -1.6(3)   | C13 – C8 – C9 – C10   | -0.4(3)   | P2 – O3 – C15 – C16  | 108.6(1)  |
| C7 – C8 – C9 – C10   | 0.4(3)    | P1 – C8 – C9 – C10    | -179.9(1) | C8 – C9 – C10 – C11  | -0.4(2)   |
|                      |           | C8 – C9 – C10 – C11   | -0.5(3)   | C7 – C12 – C11 – C10 | 0.4(2)    |
|                      |           | C9 – C10 – C11 – C12  | 1.2(3)    | C9 – C10 – C11 – C12 | 0.2(2)    |
|                      |           | C9 – C10 – C11 – C14  | -178.2(2) |                      |           |
|                      |           | C10 – C11 – C12 – C13 | -1.1(3)   |                      |           |
|                      |           | C14 – C11 – C12 – C13 | 178.3(2)  |                      |           |
|                      |           | C11 – C12 – C13 – C8  | 0.3(3)    |                      |           |

**2. Spectra of the compounds 2a-f, 3a, 3b-1 + 3b-2, 3c-1 + 3c-2, 5d-1 + 5d-2, 5e-1 and 5f-1 synthesized**

<sup>31</sup>P (202 MHz, CDCl<sub>3</sub>)

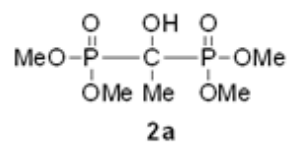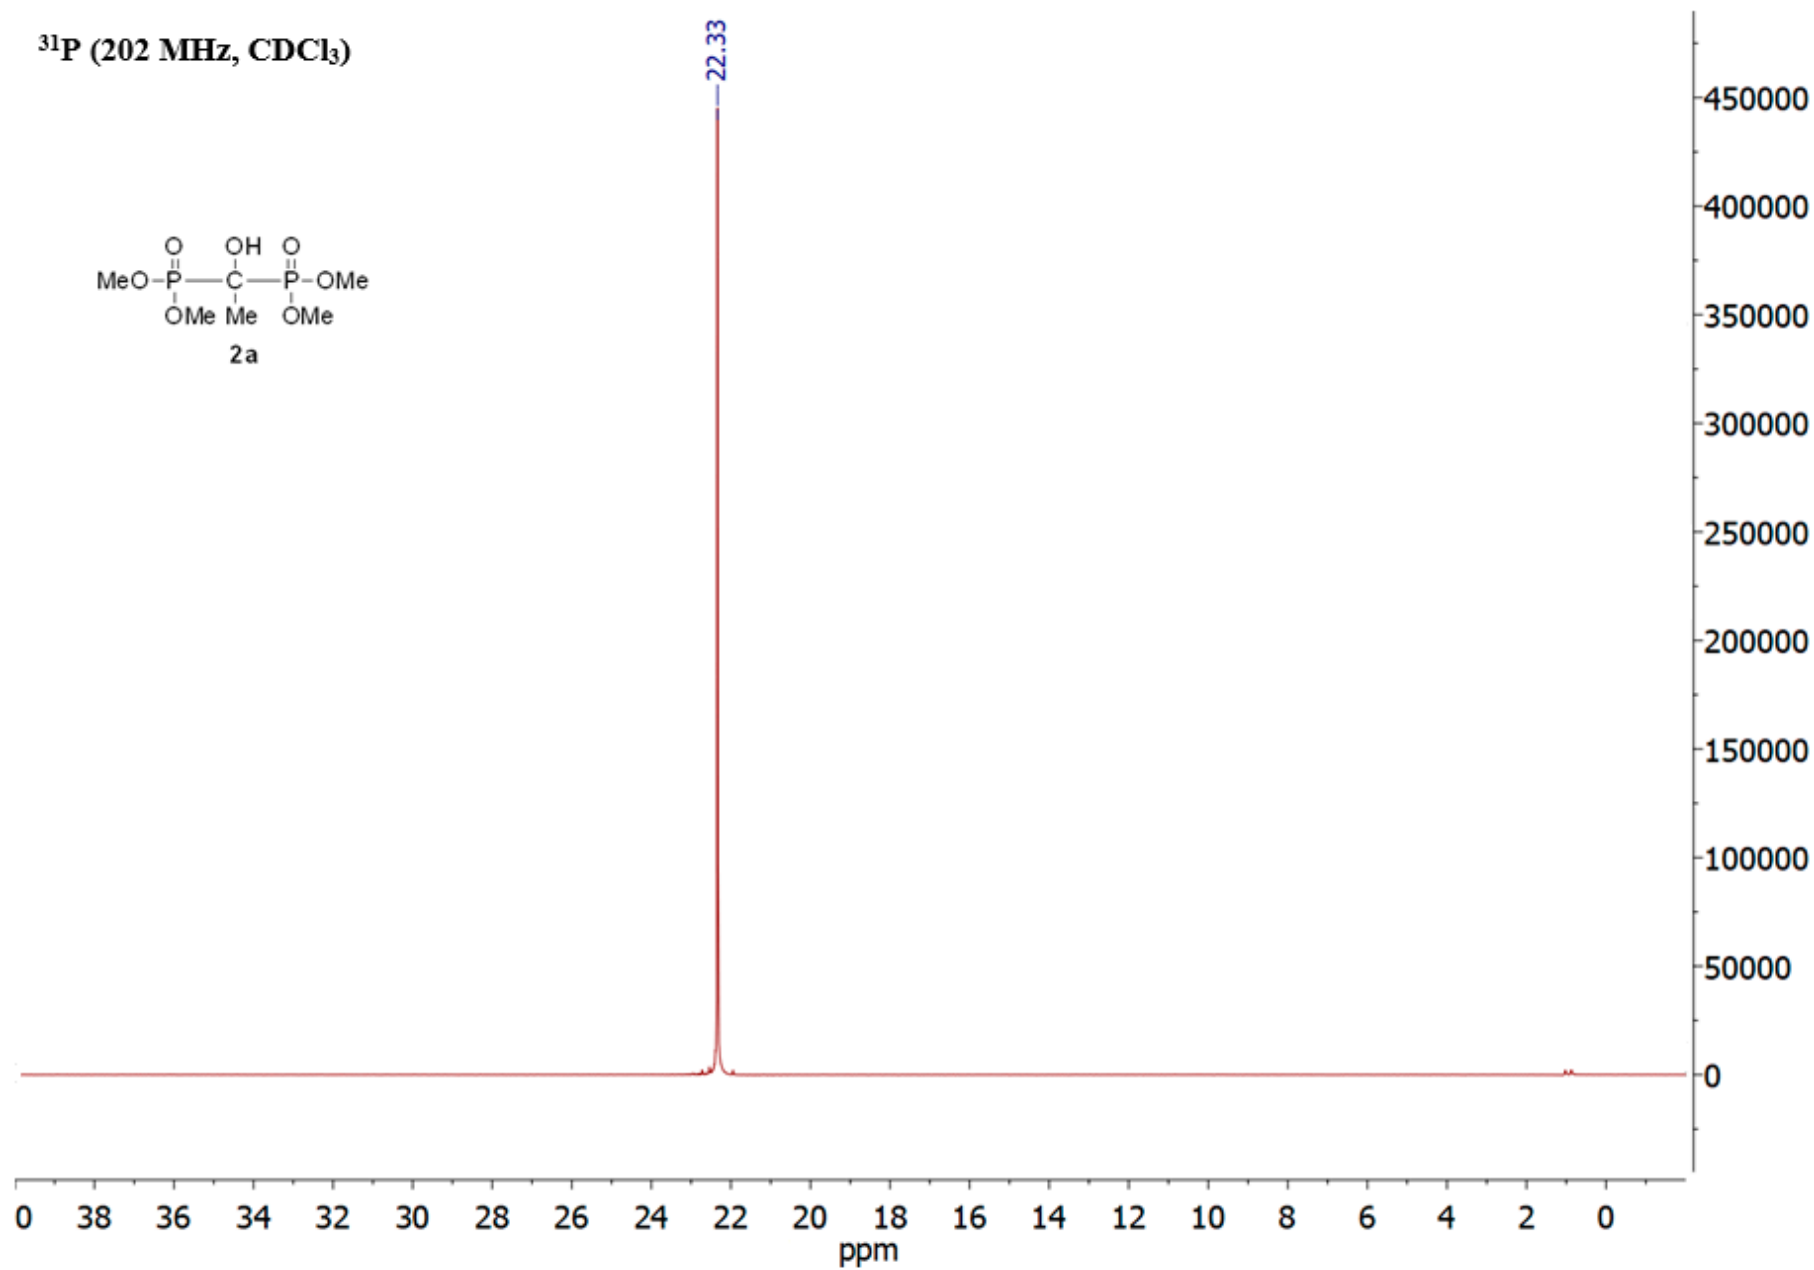

$^{13}\text{C}$  (126 MHz,  $\text{CDCl}_3$ )

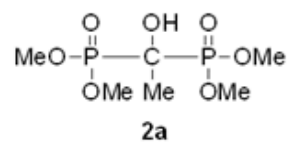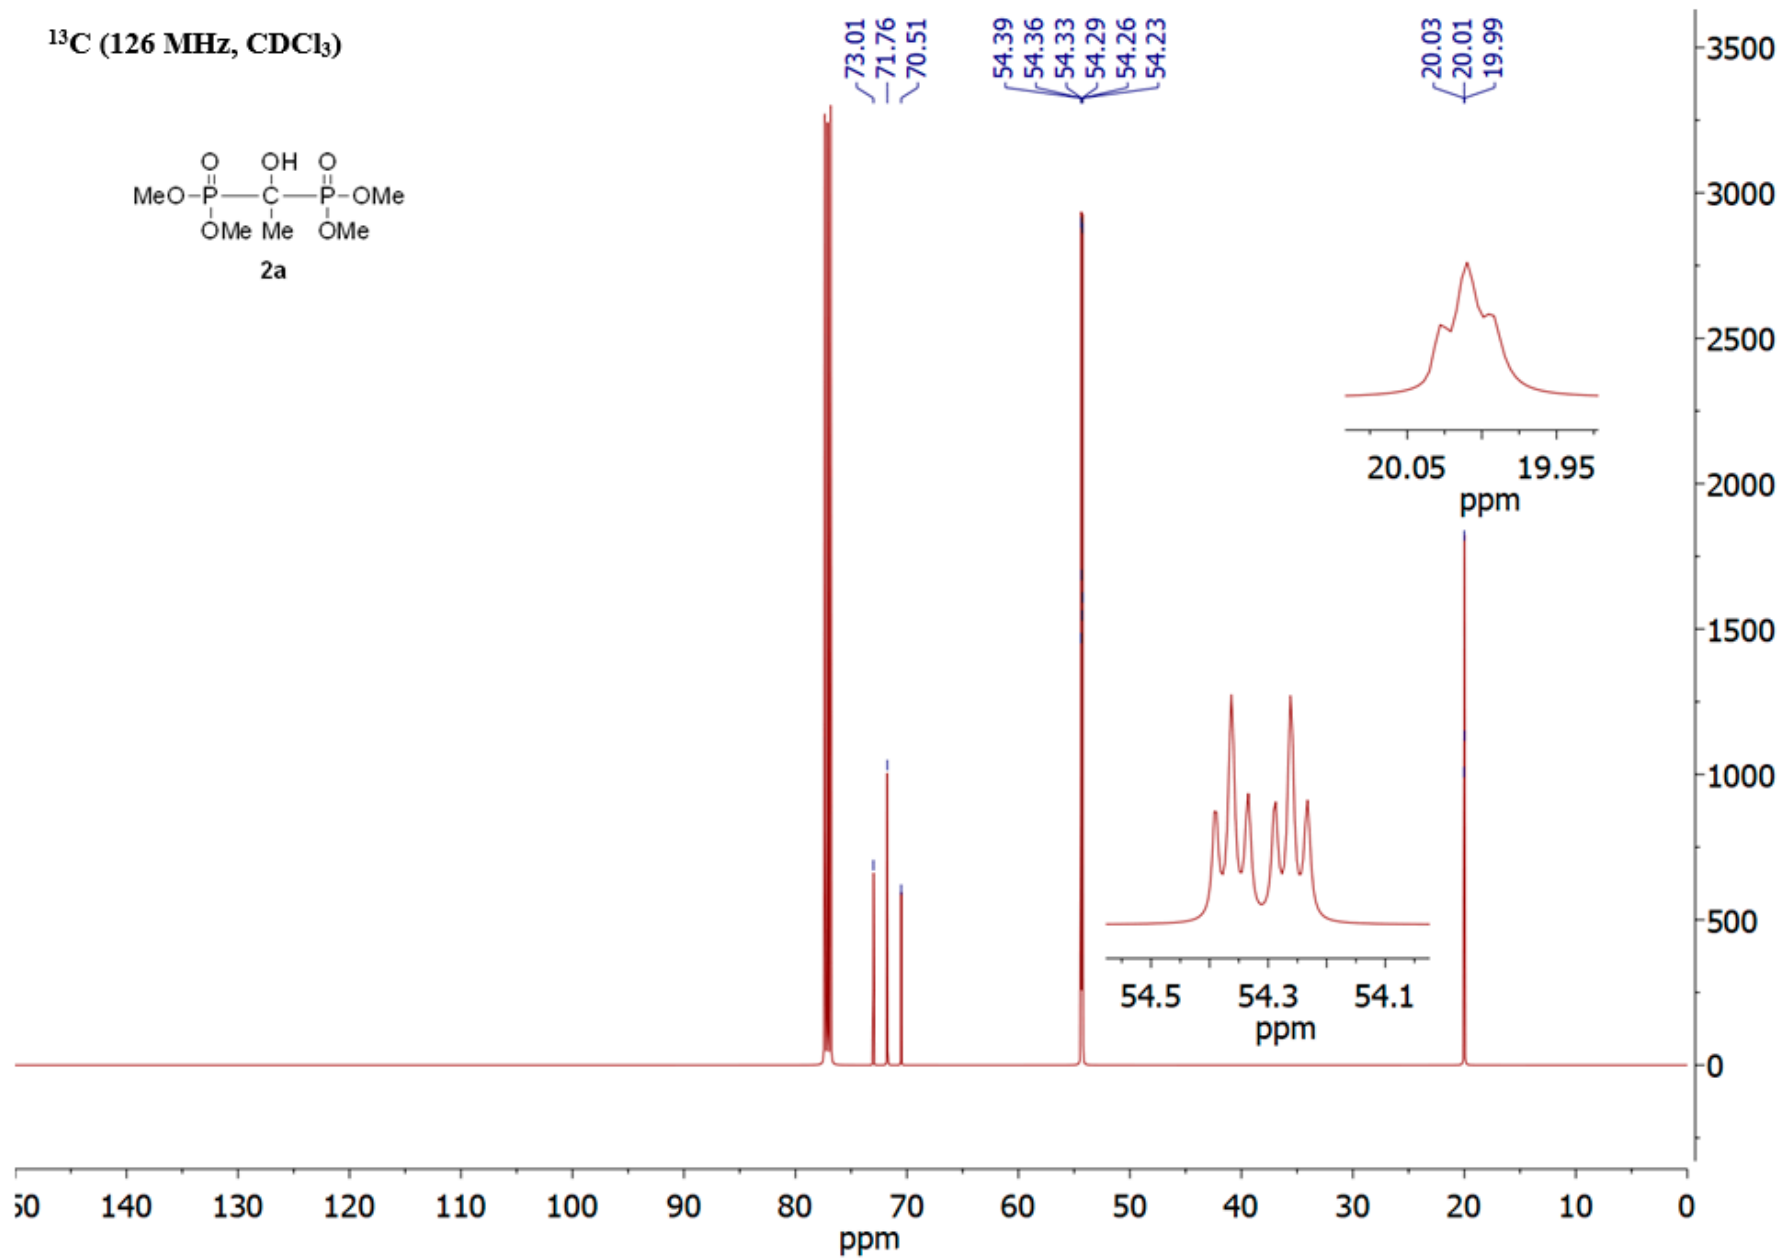

$^1\text{H}$  (500 MHz,  $\text{CDCl}_3$ )

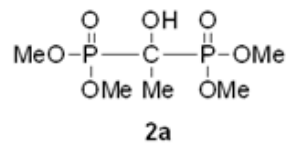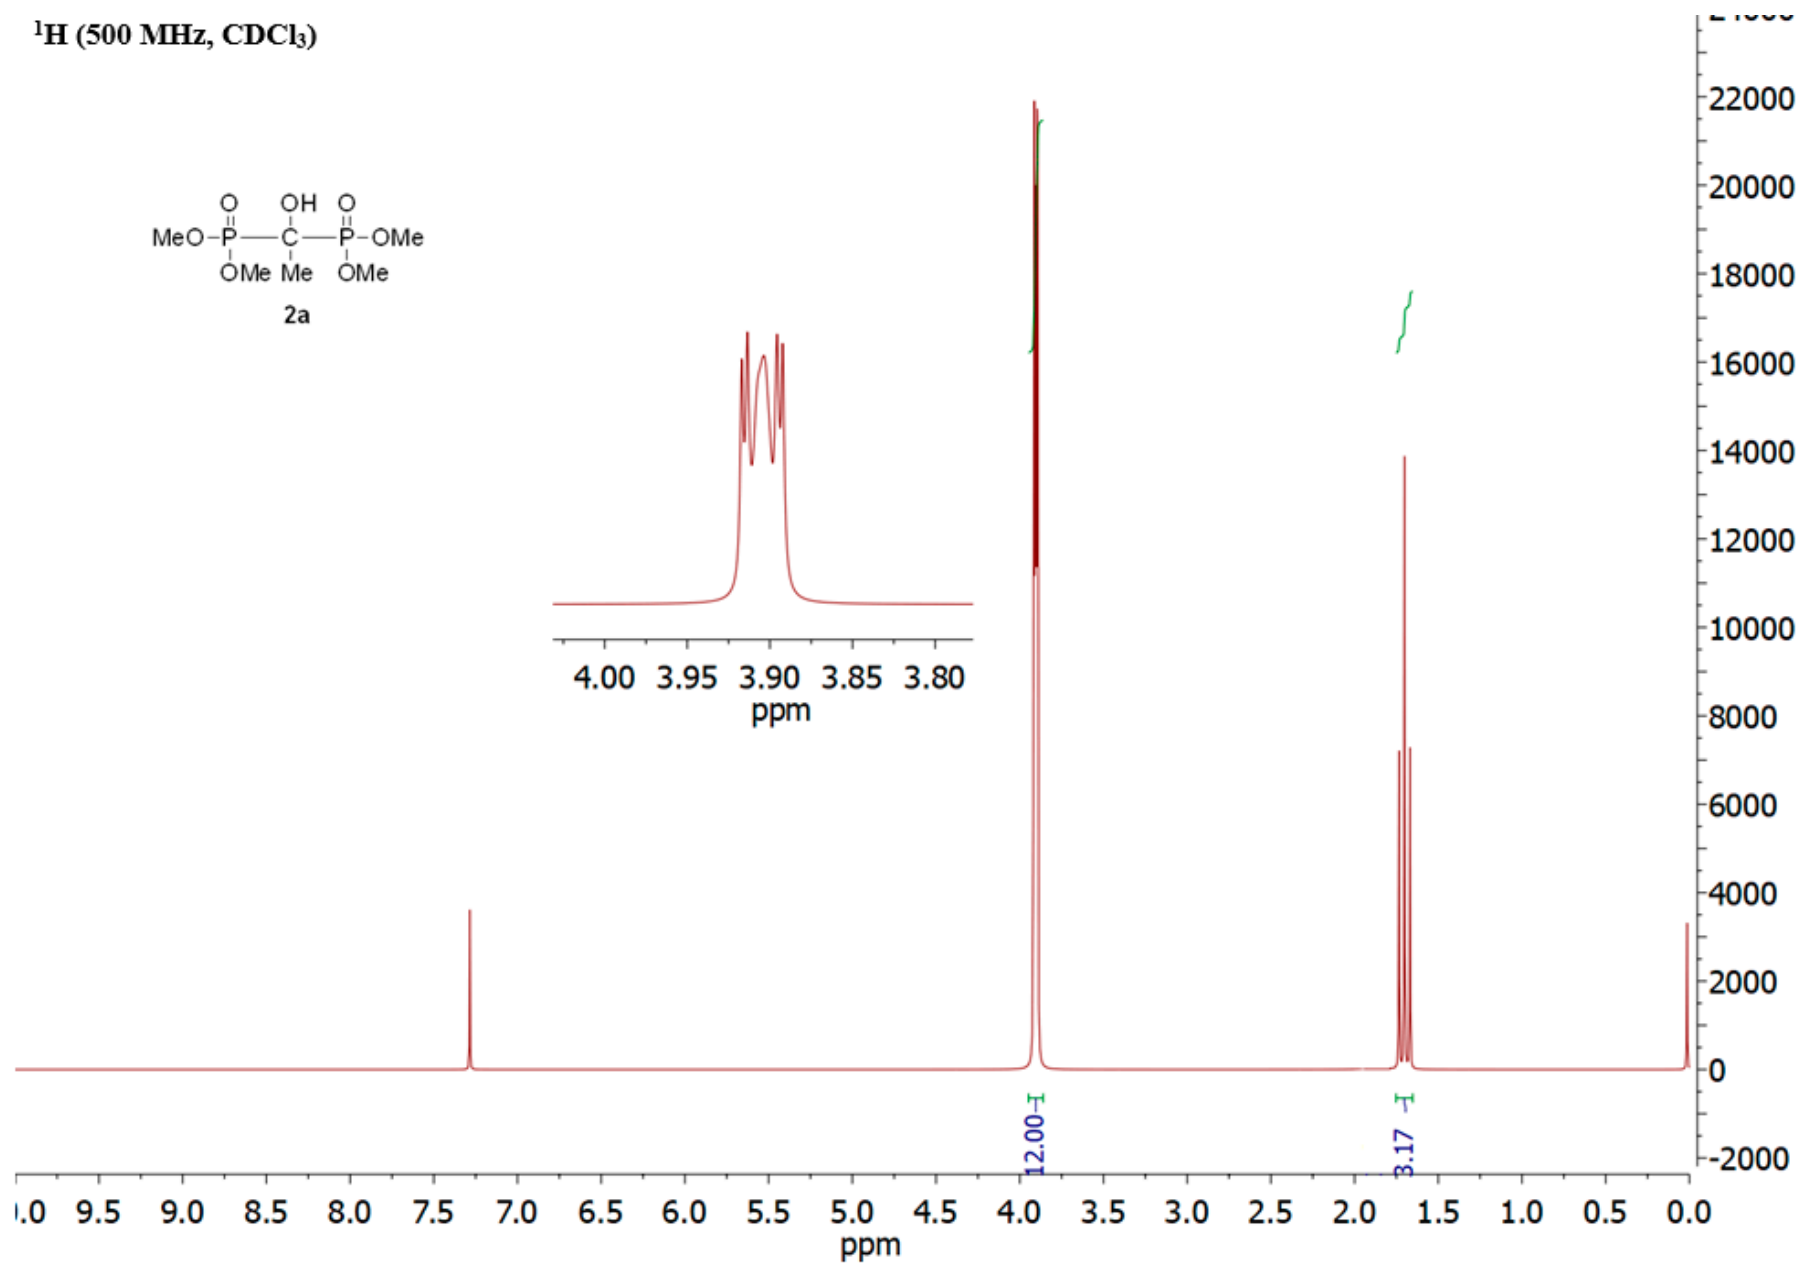



$^{31}\text{P}$  (202 MHz,  $\text{CDCl}_3$ )

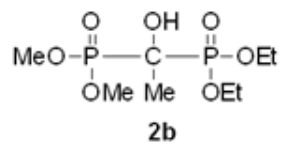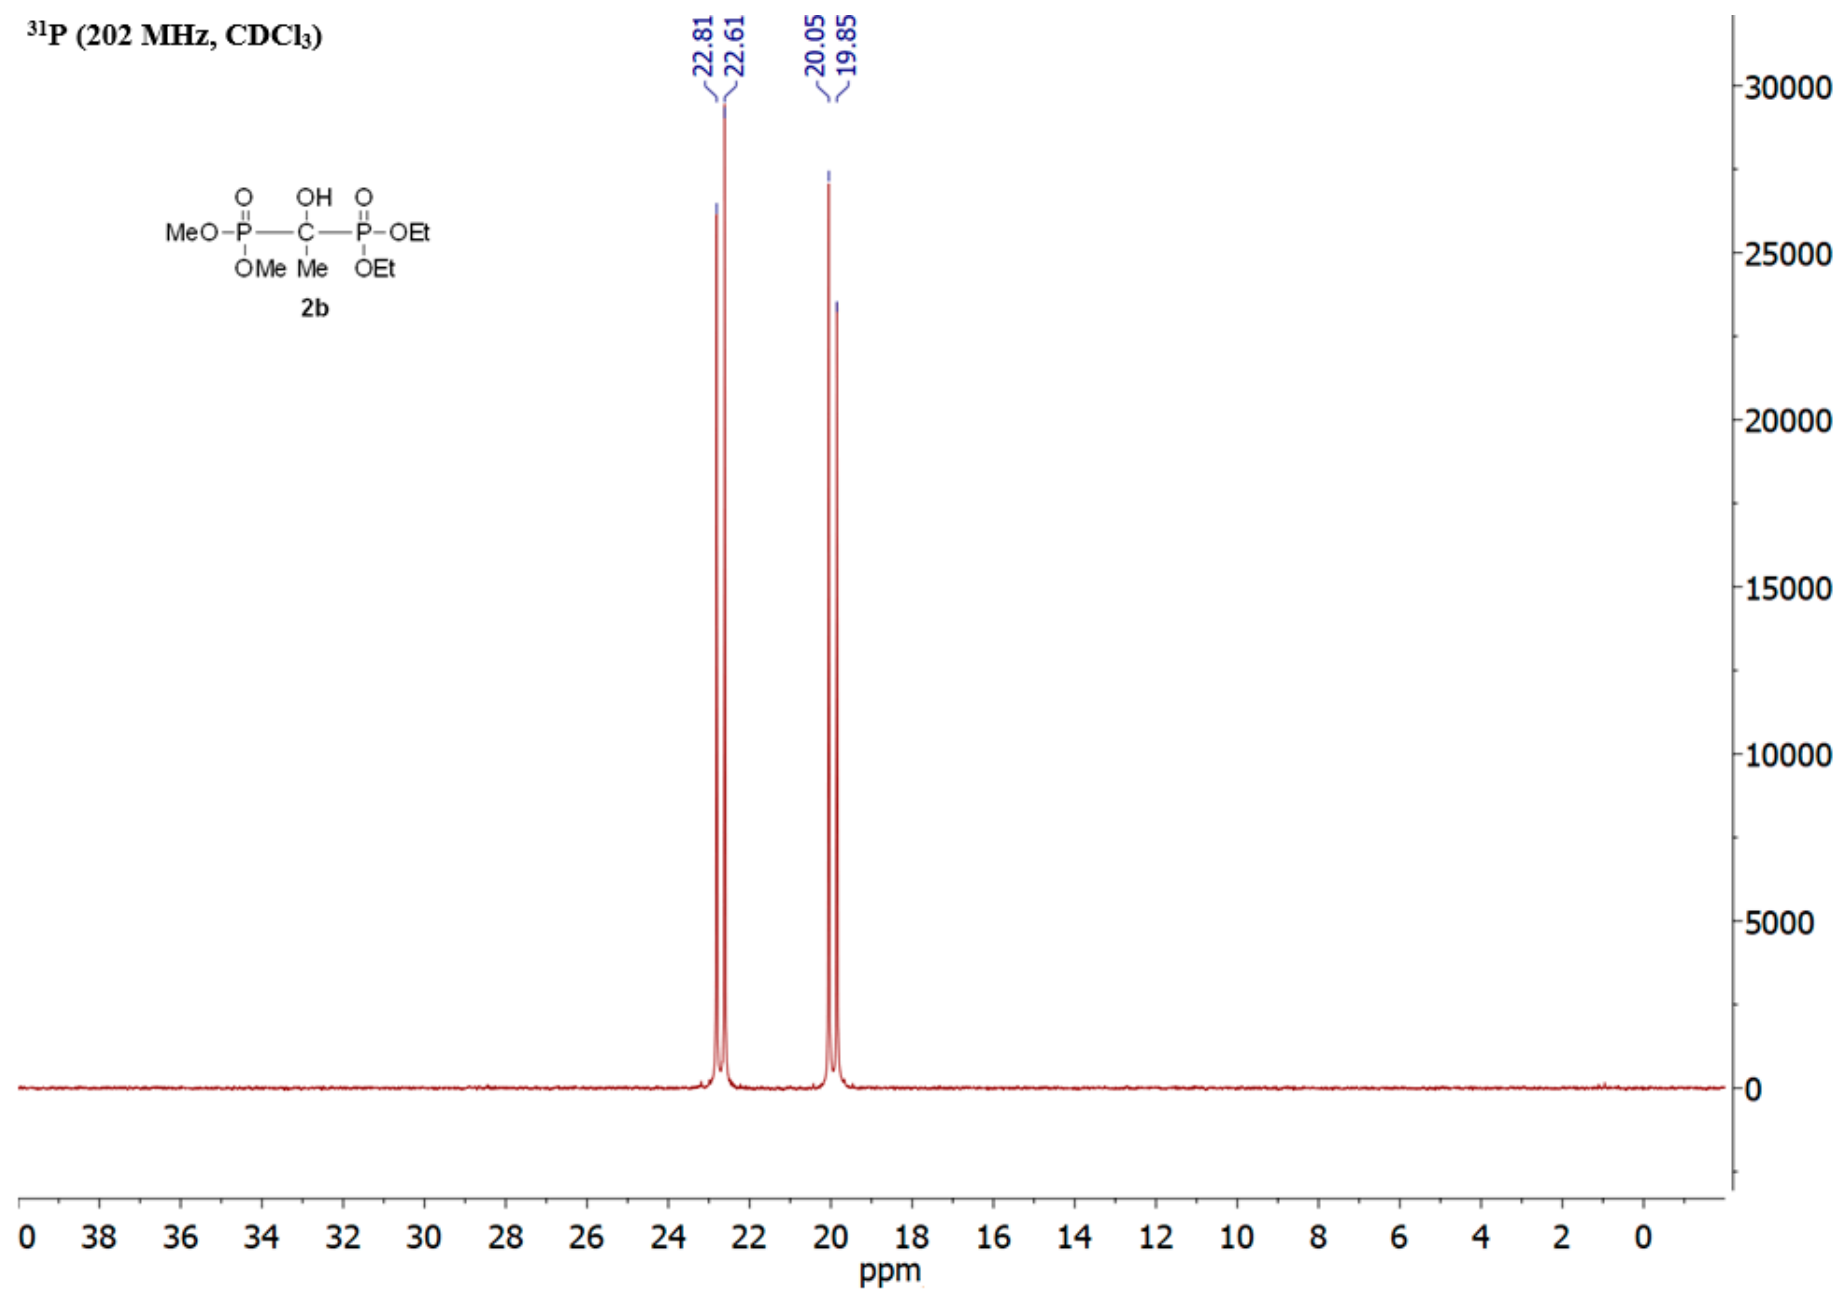

$^{13}\text{C}$  (75 MHz,  $\text{CDCl}_3$ )

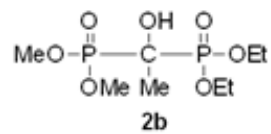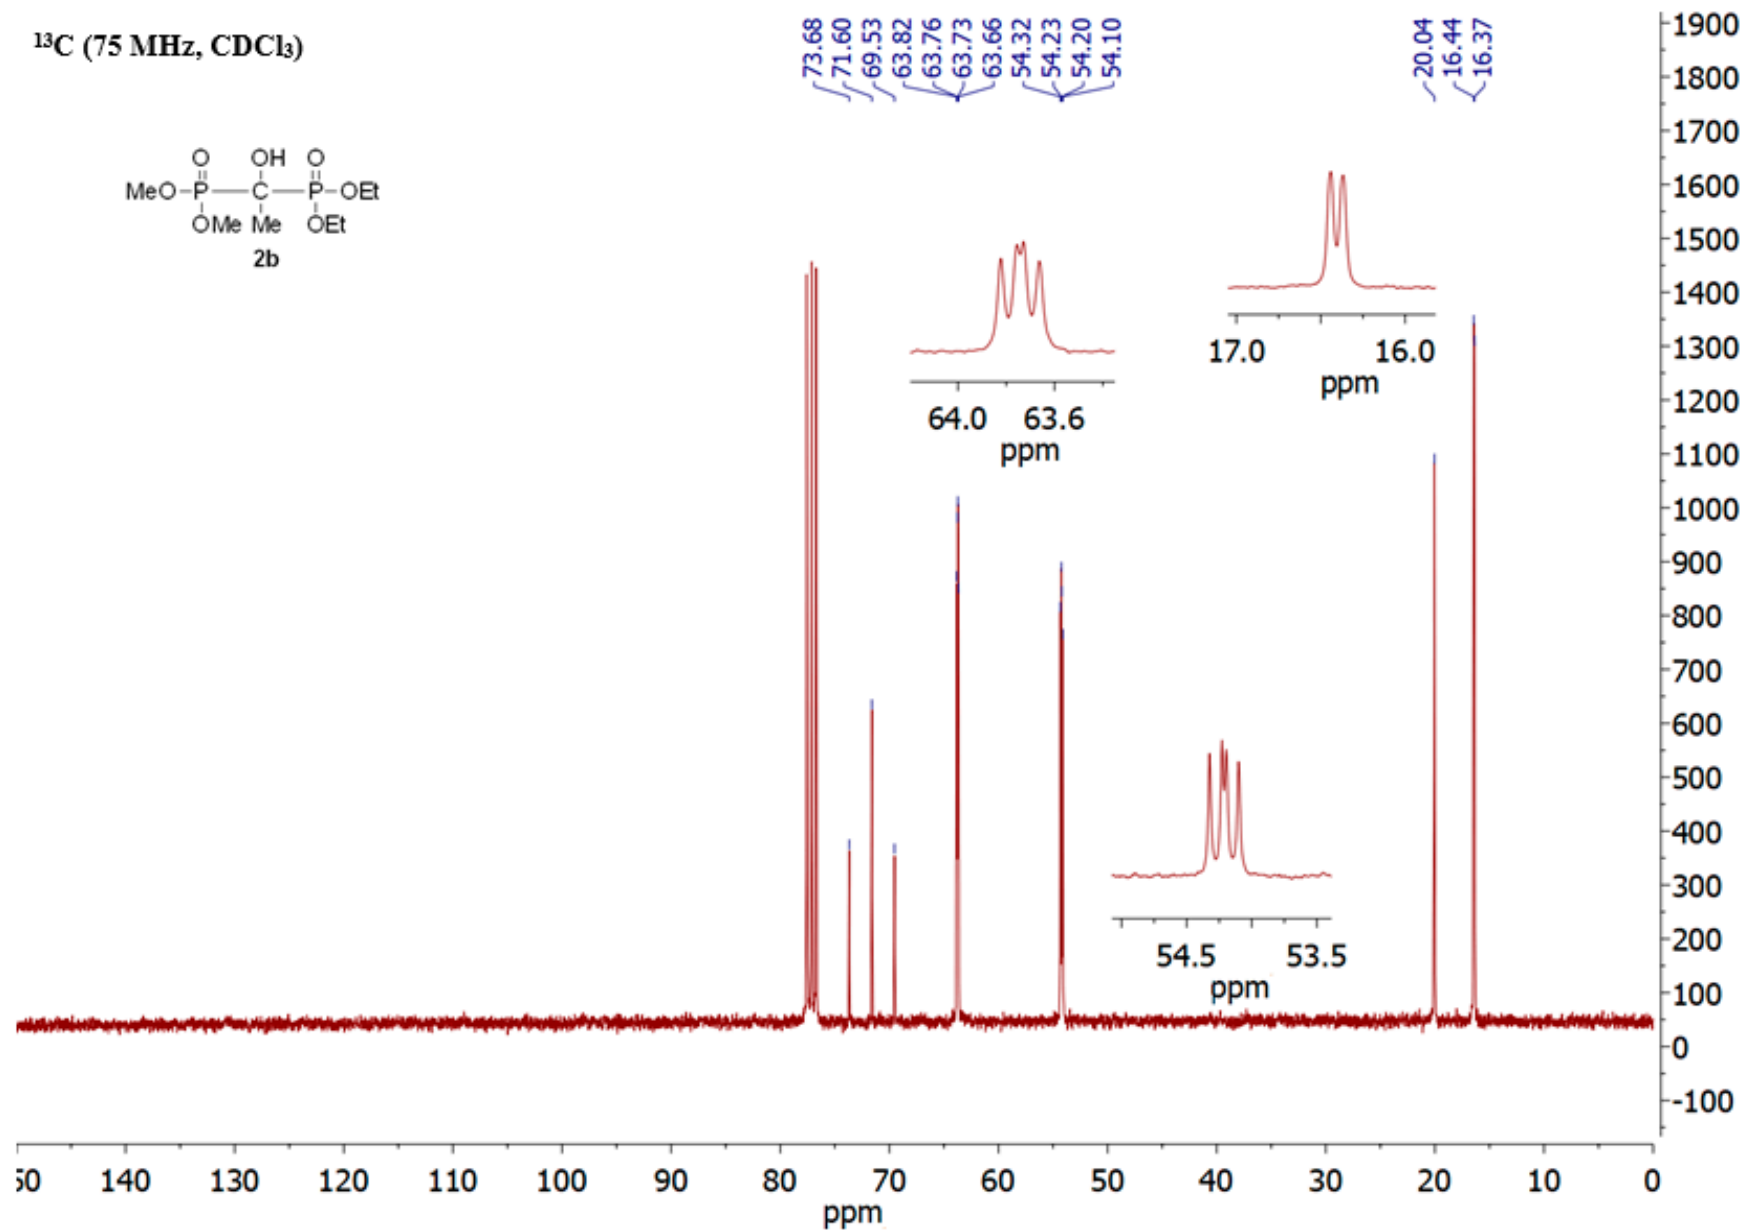

$^1\text{H}$  (300 MHz,  $\text{CDCl}_3$ )

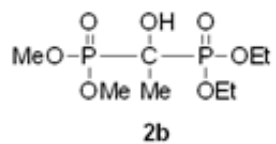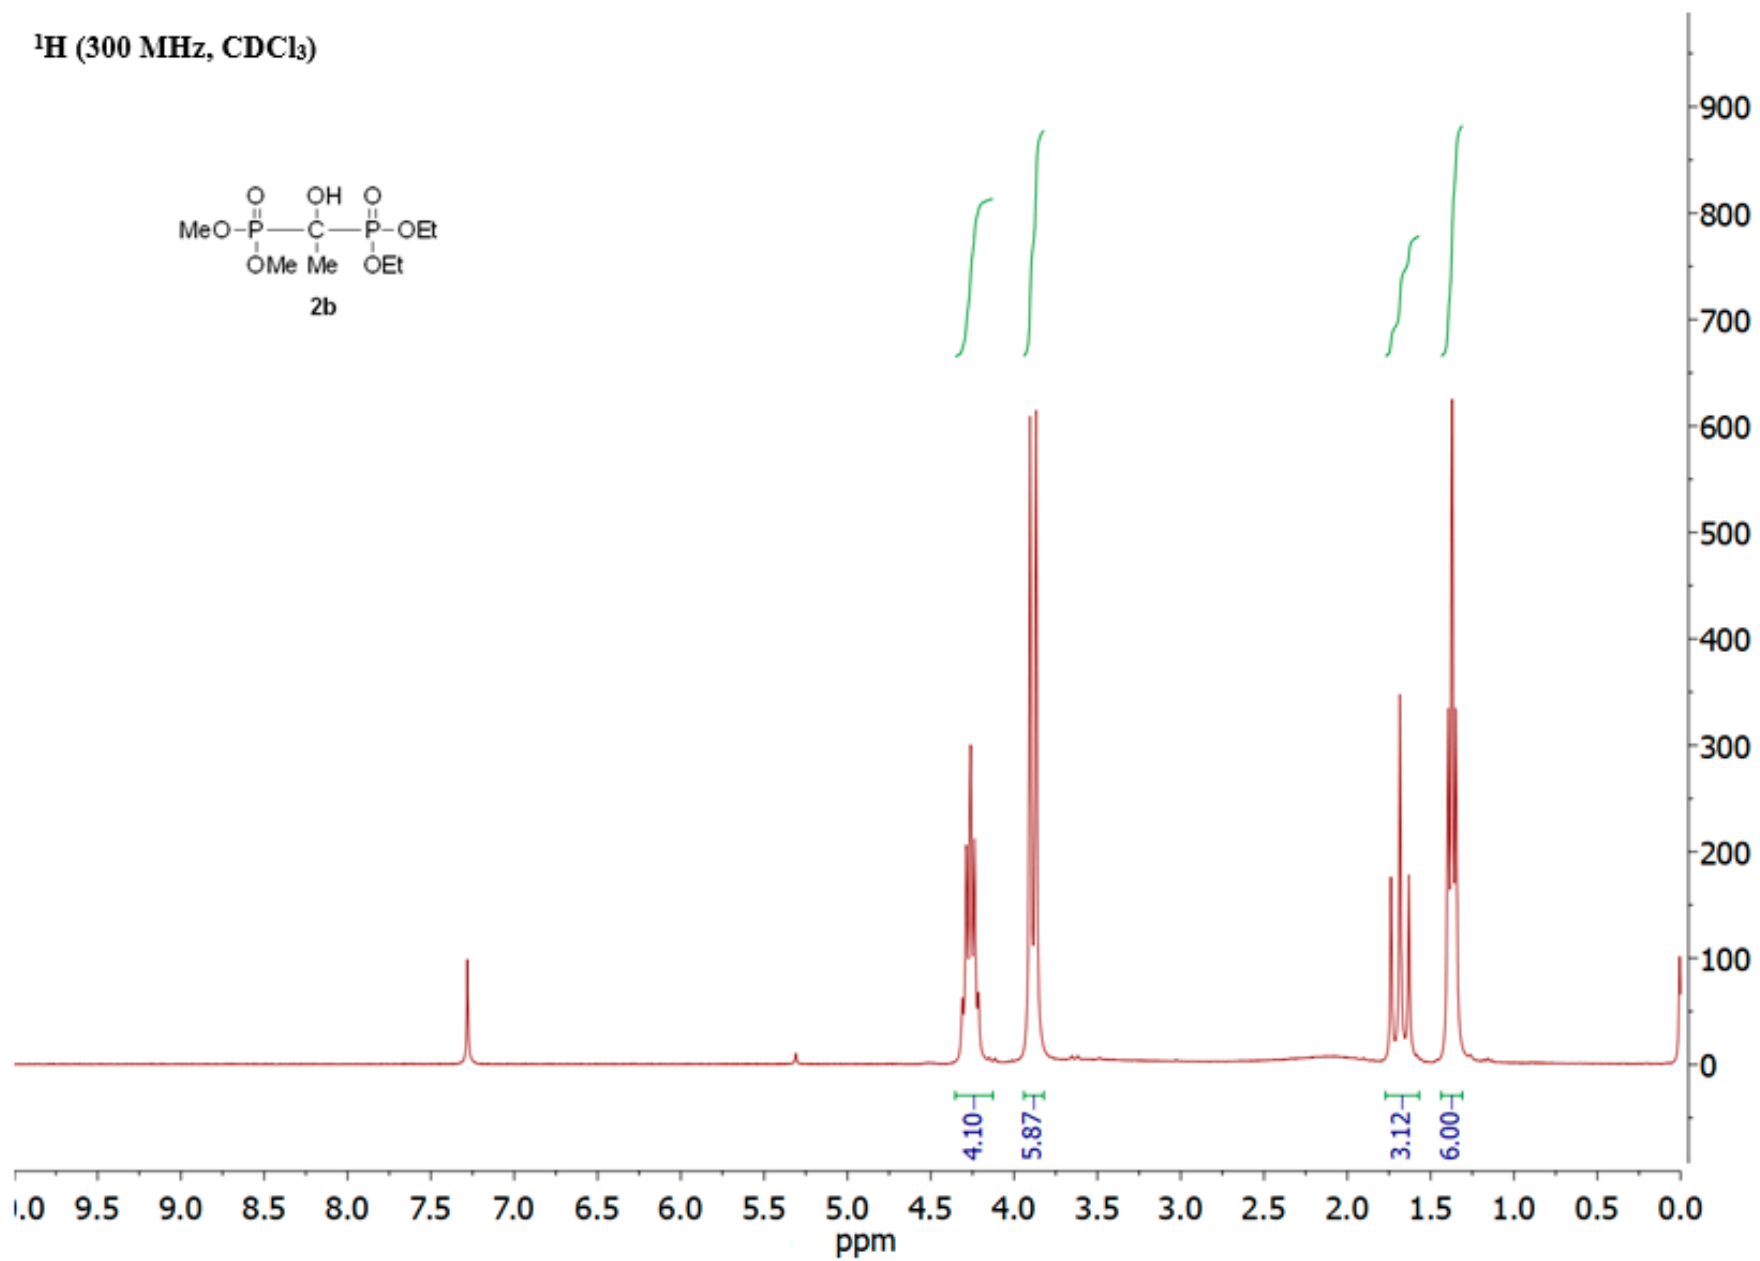

<sup>31</sup>P (202 MHz, CDCl<sub>3</sub>)

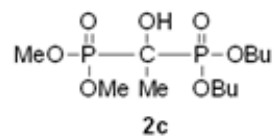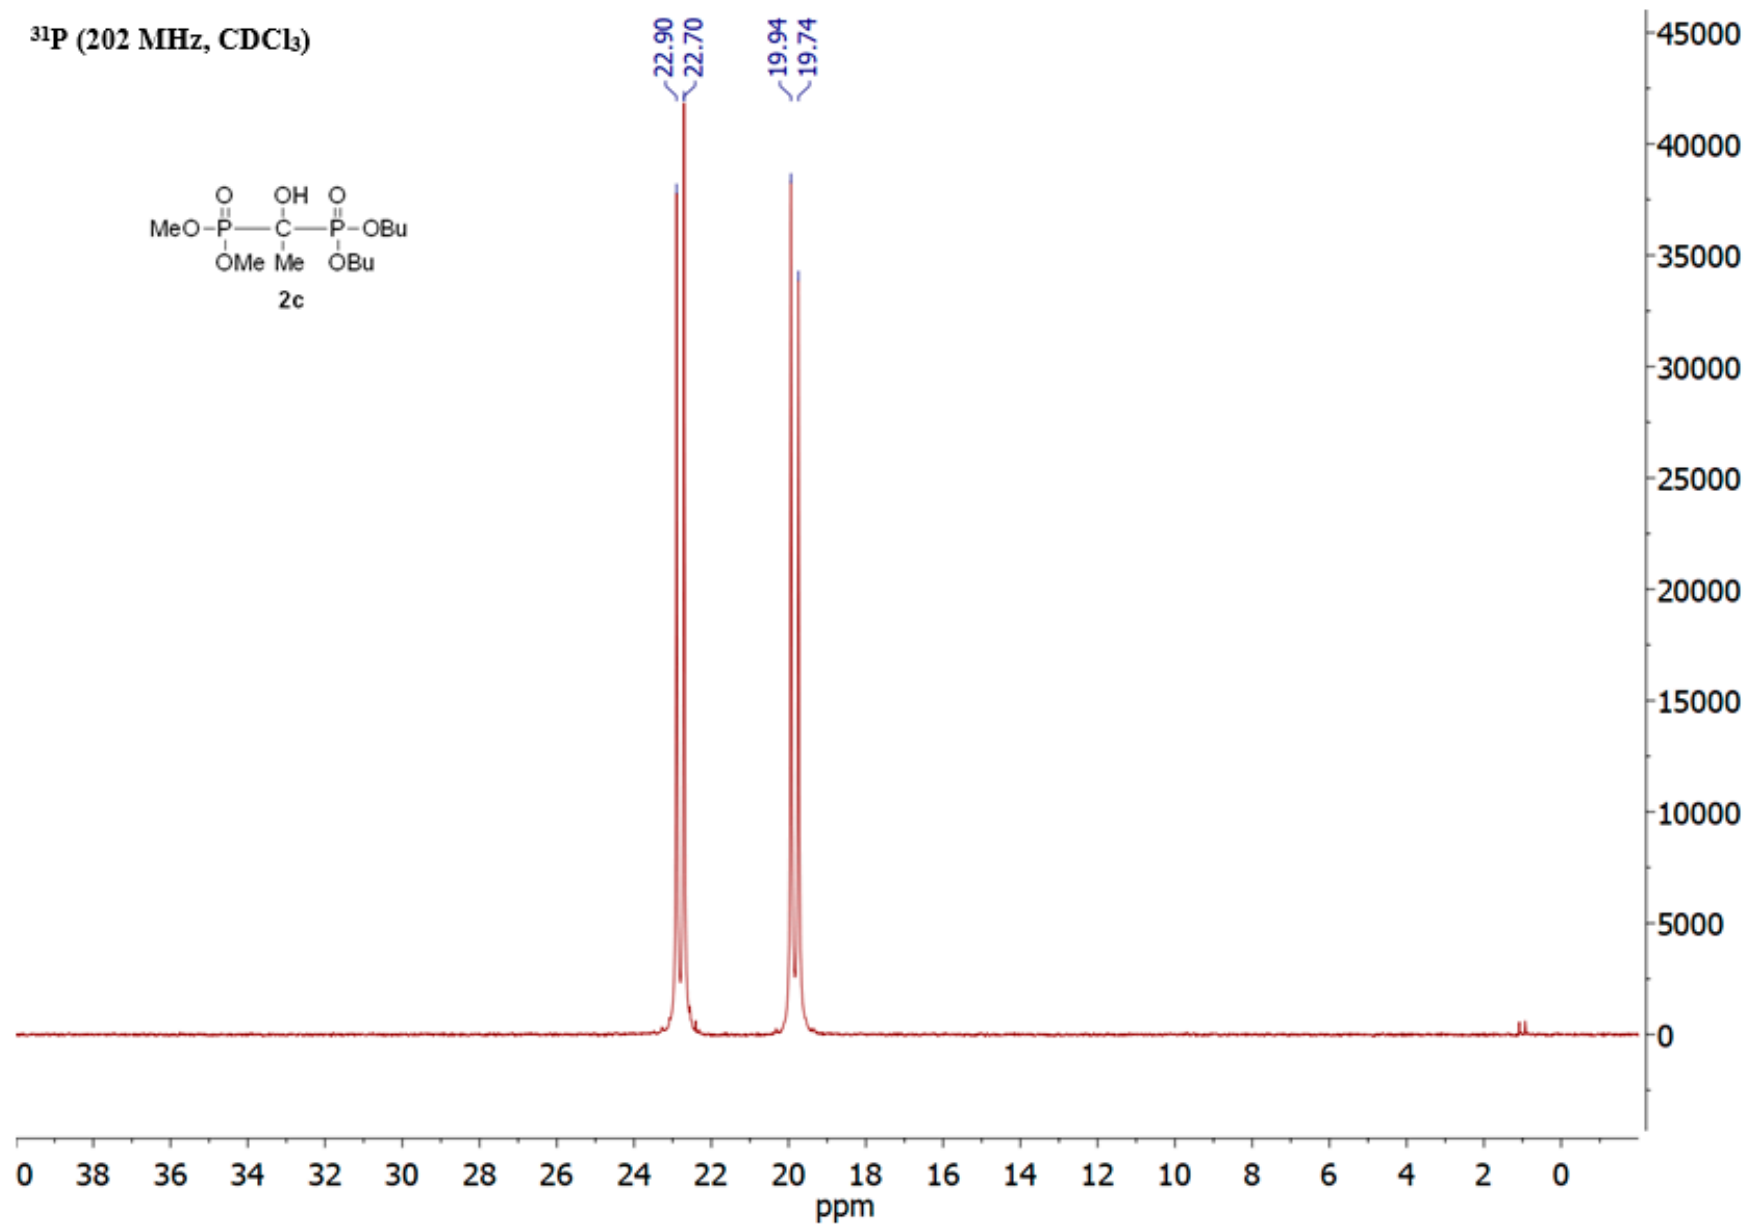

$^{13}\text{C}$  (126 MHz,  $\text{CDCl}_3$ )

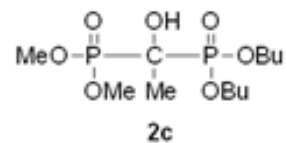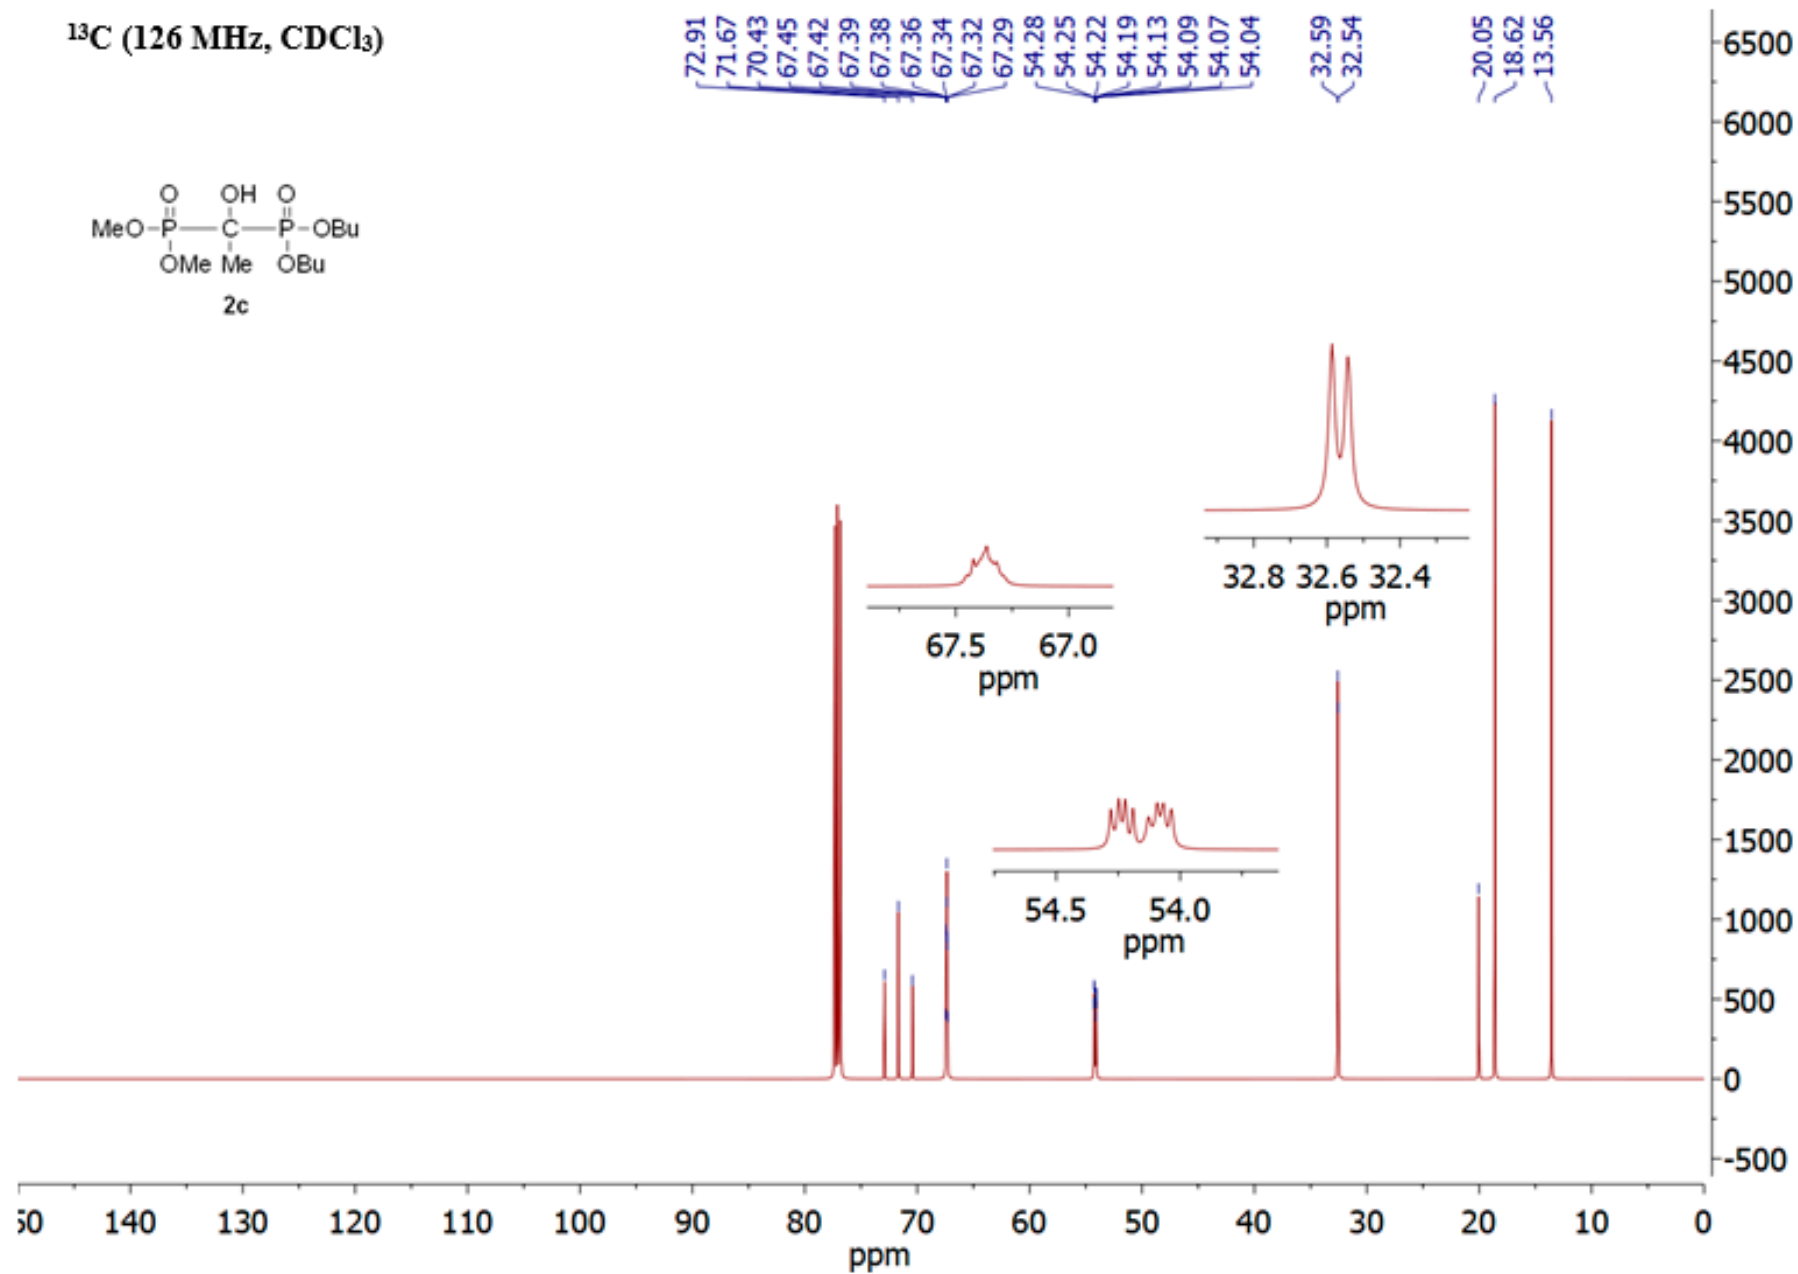

$^1\text{H}$  (300 MHz,  $\text{CDCl}_3$ )

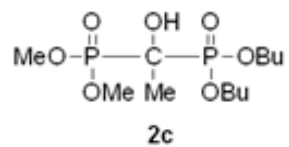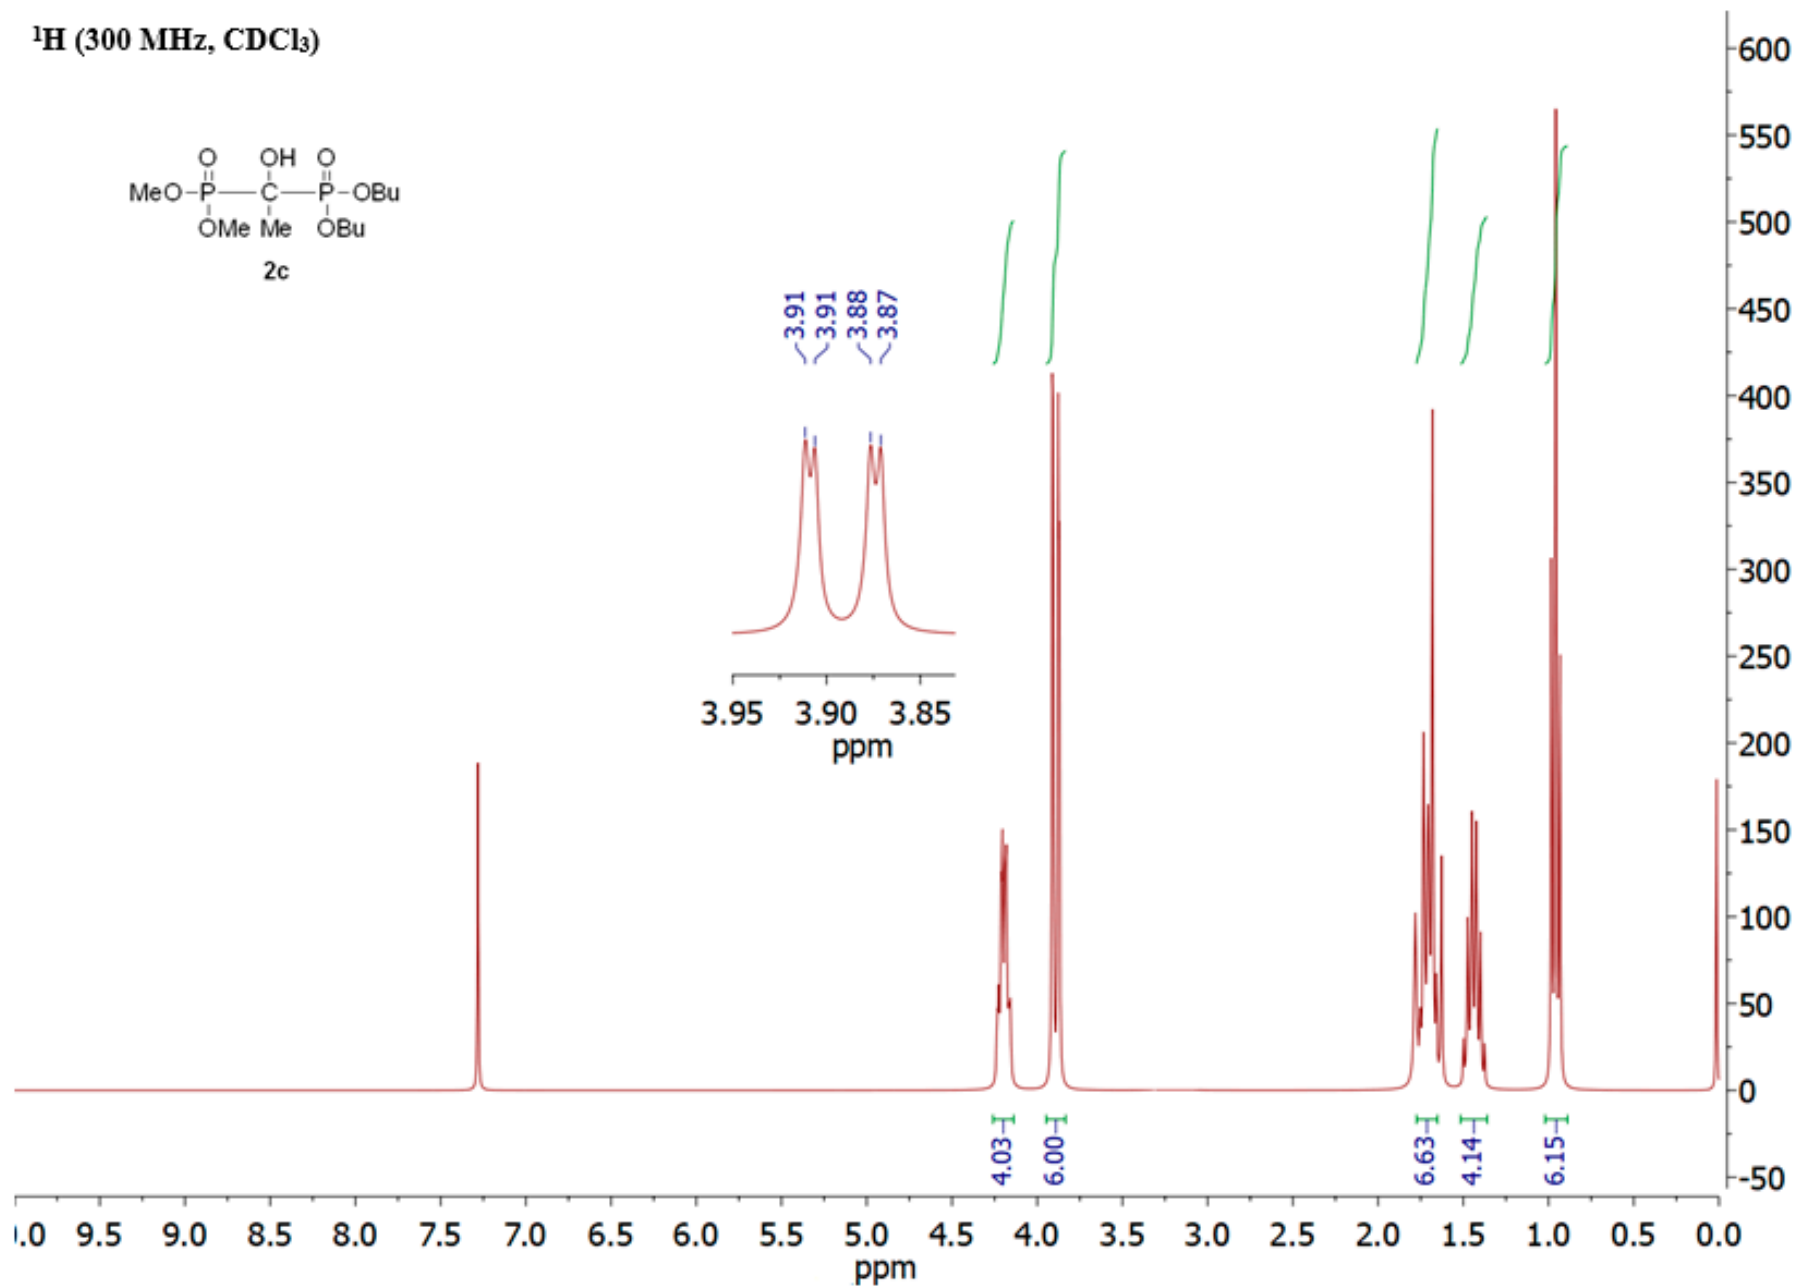

<sup>31</sup>P (202 MHz, CDCl<sub>3</sub>)

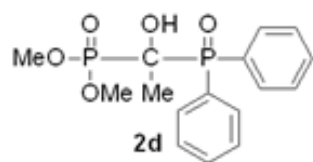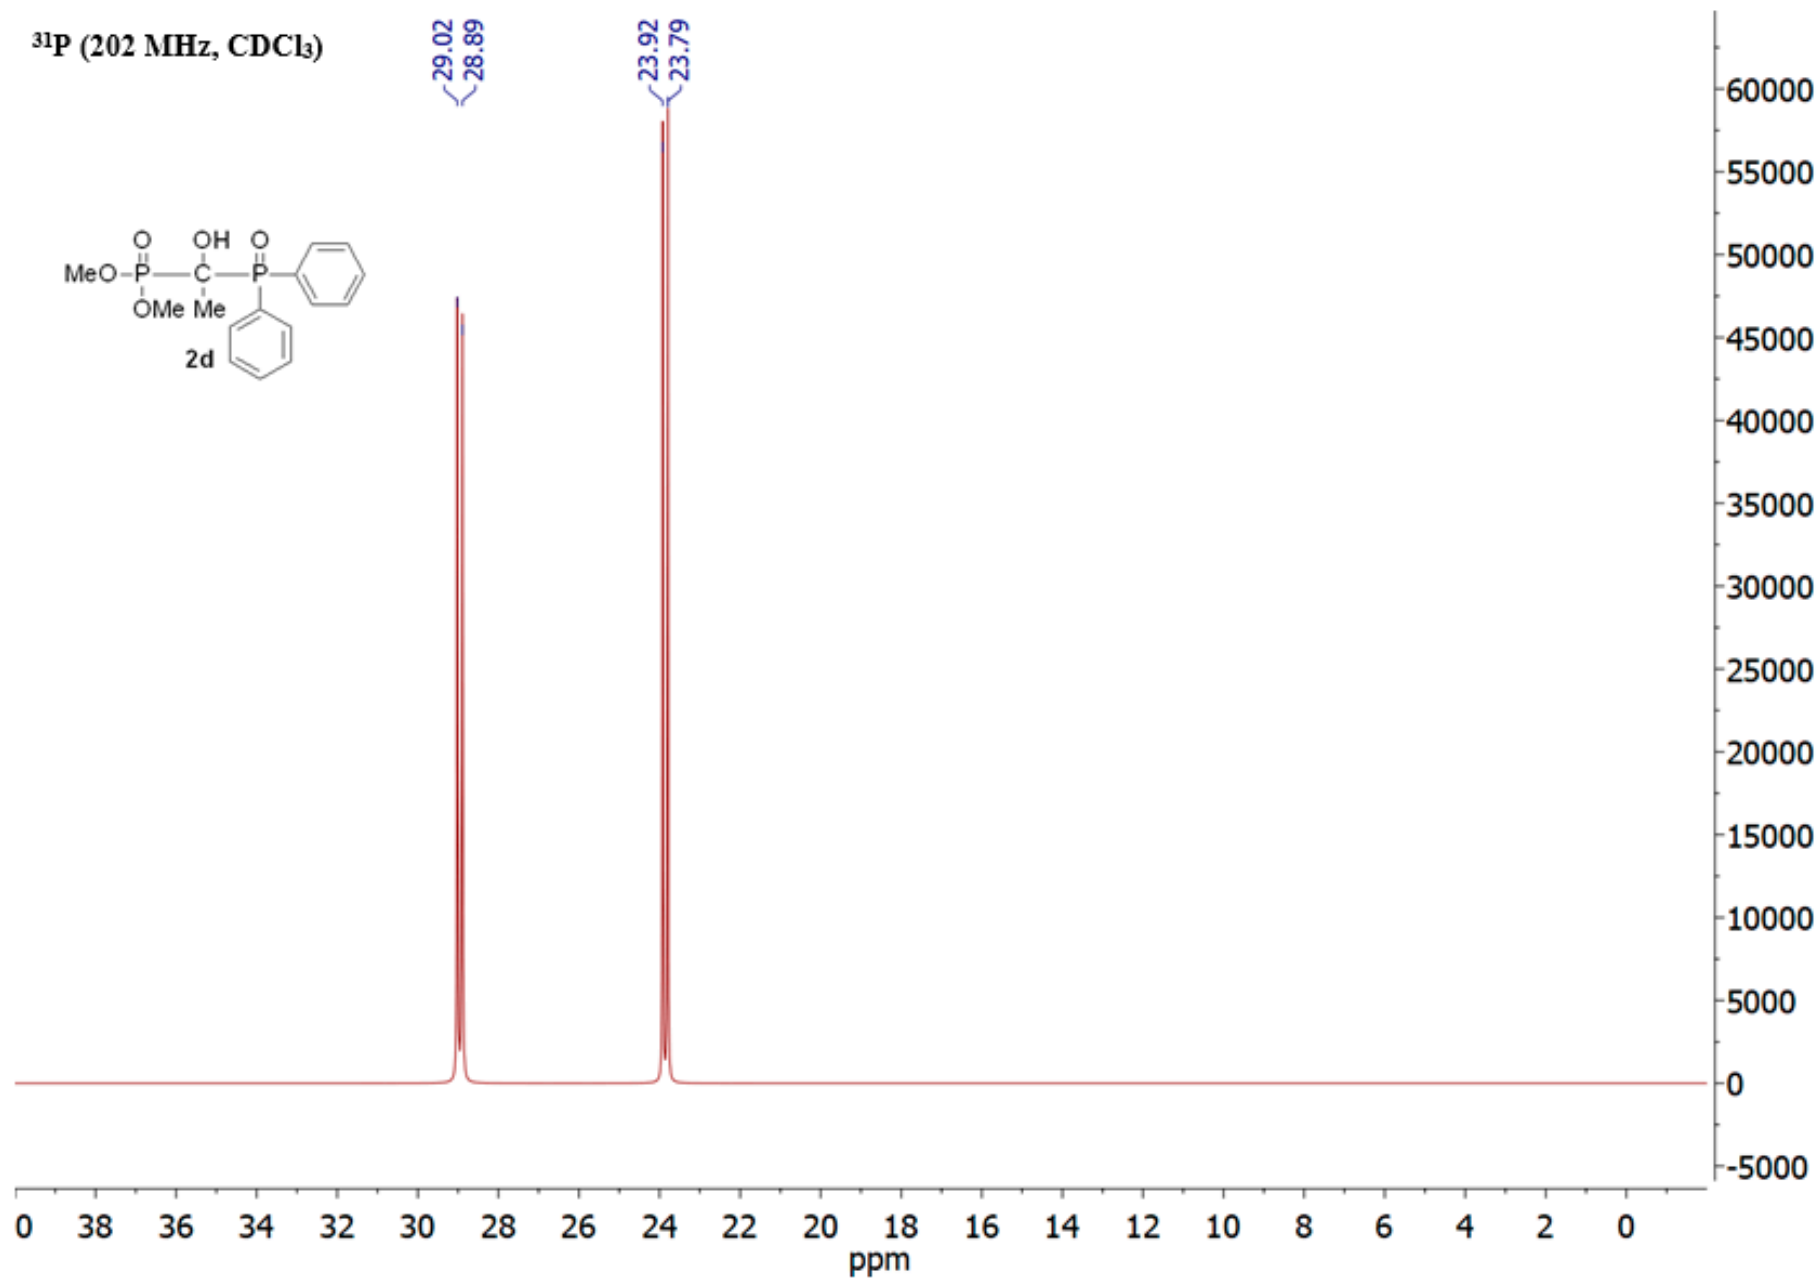

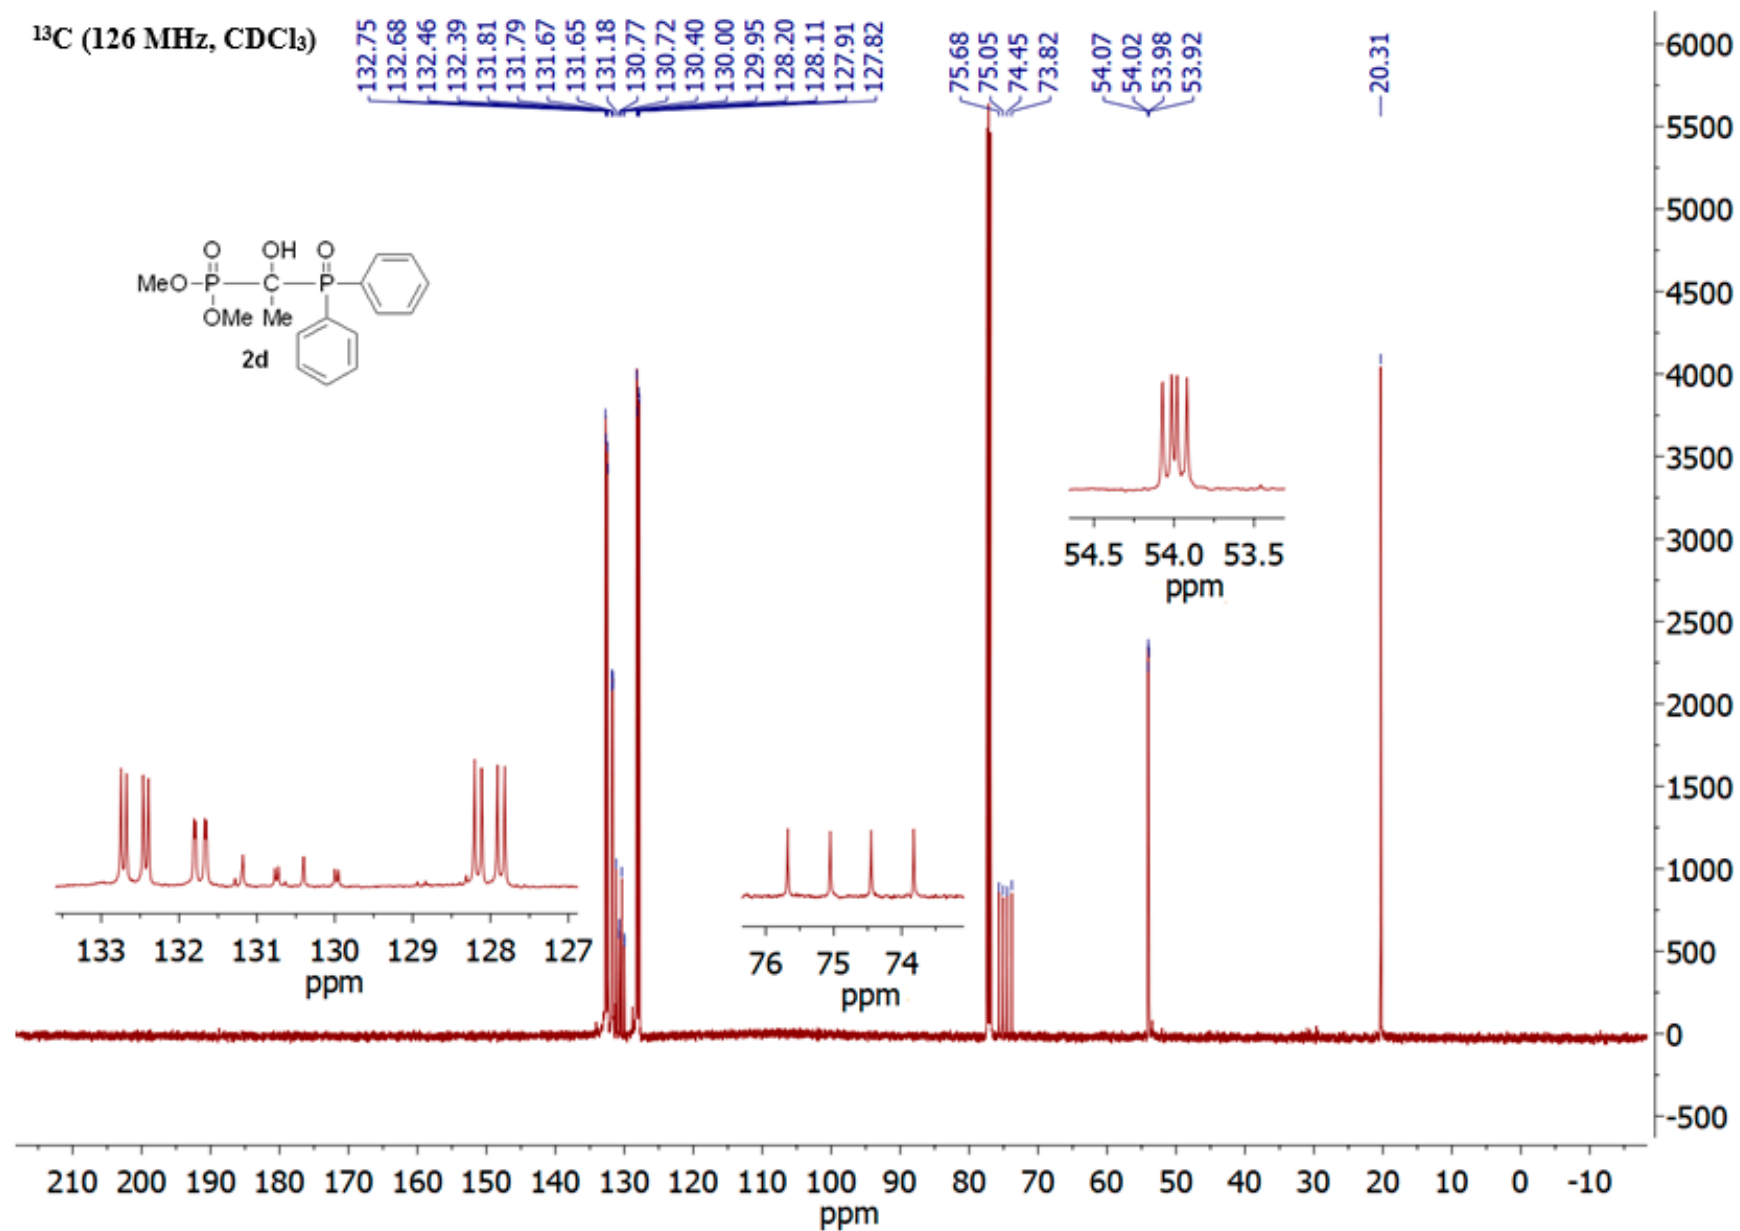



$^1\text{H}$  (500 MHz,  $\text{CDCl}_3$ )

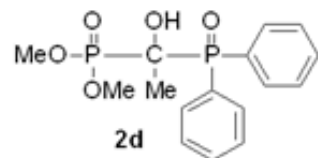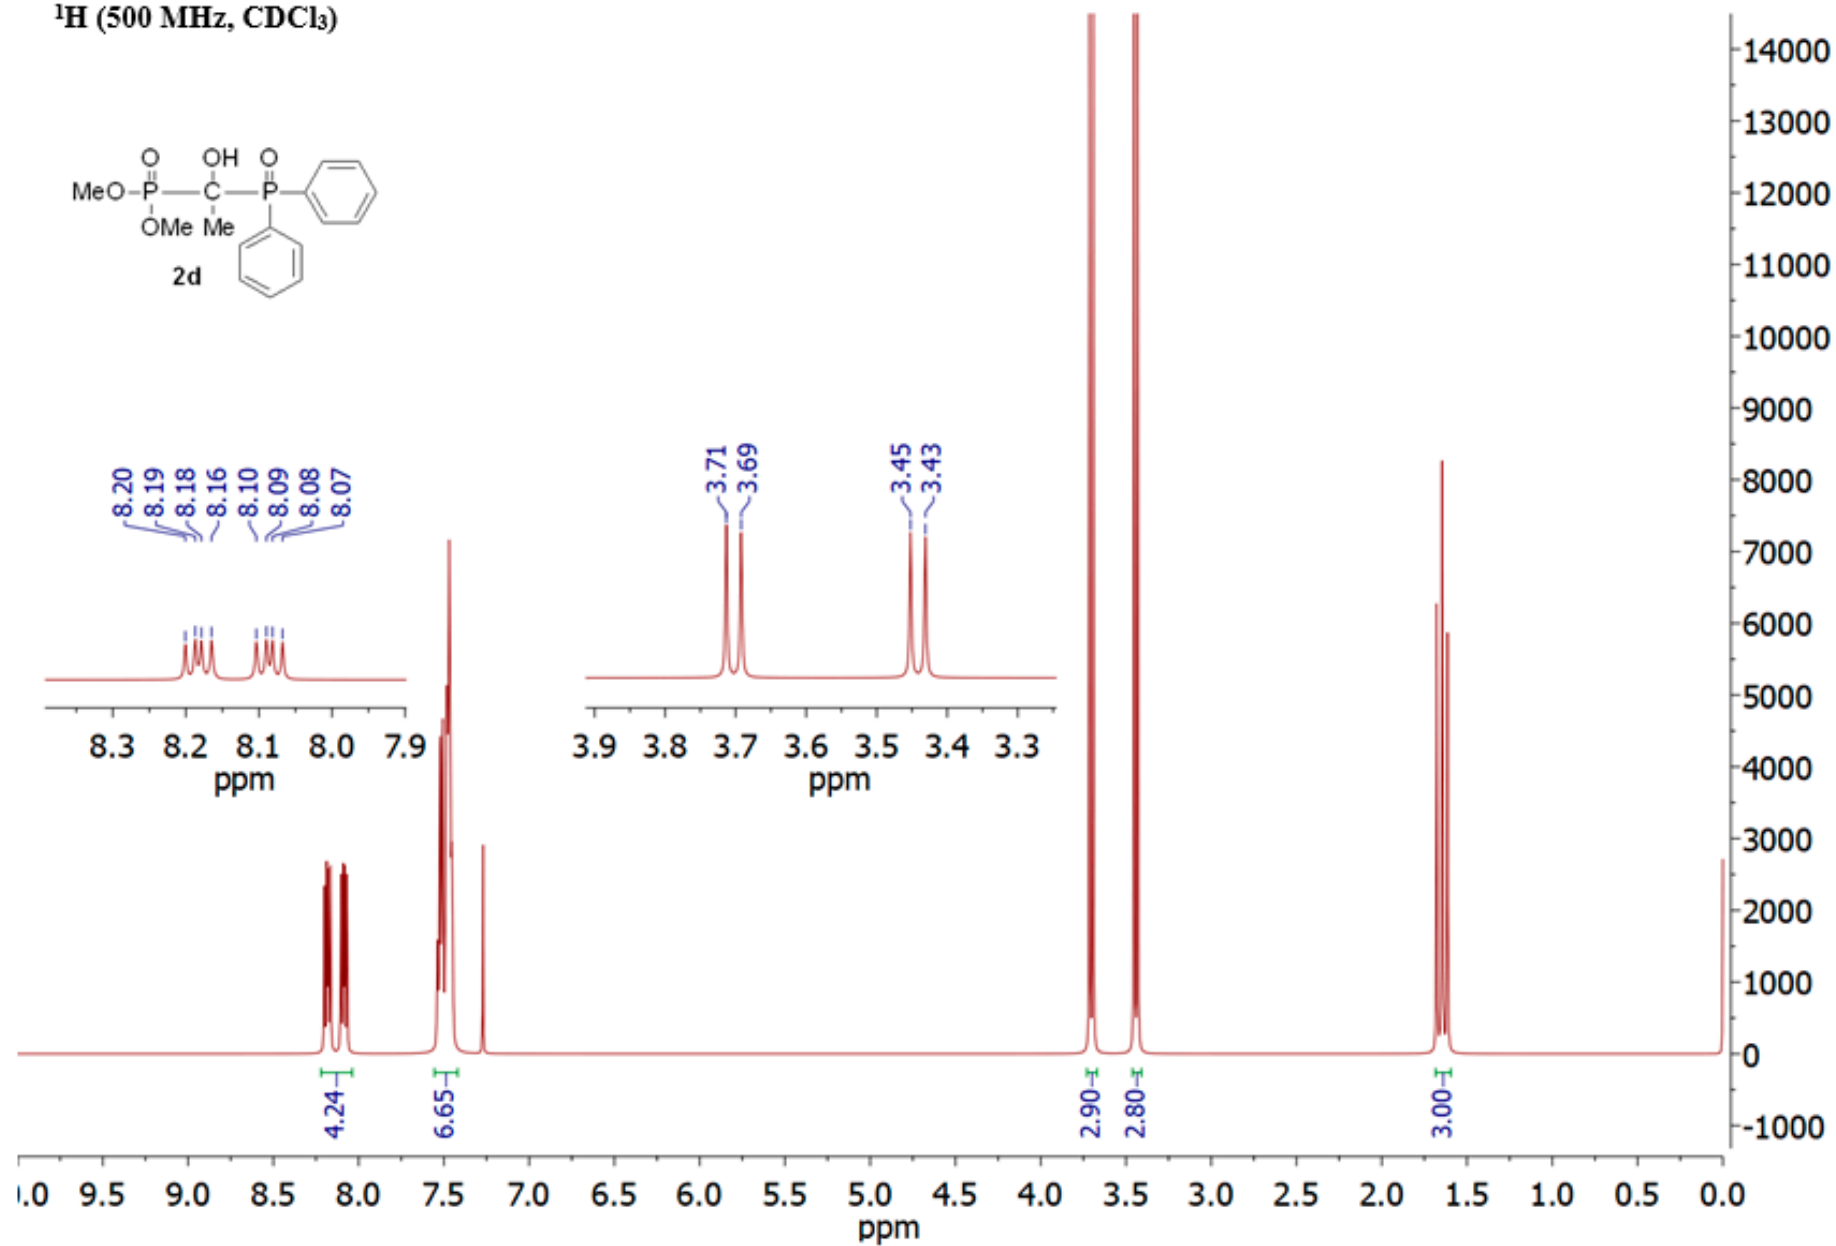

$^{31}\text{P}$  (202 MHz,  $\text{CDCl}_3$ )

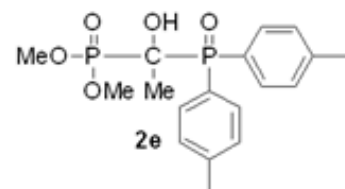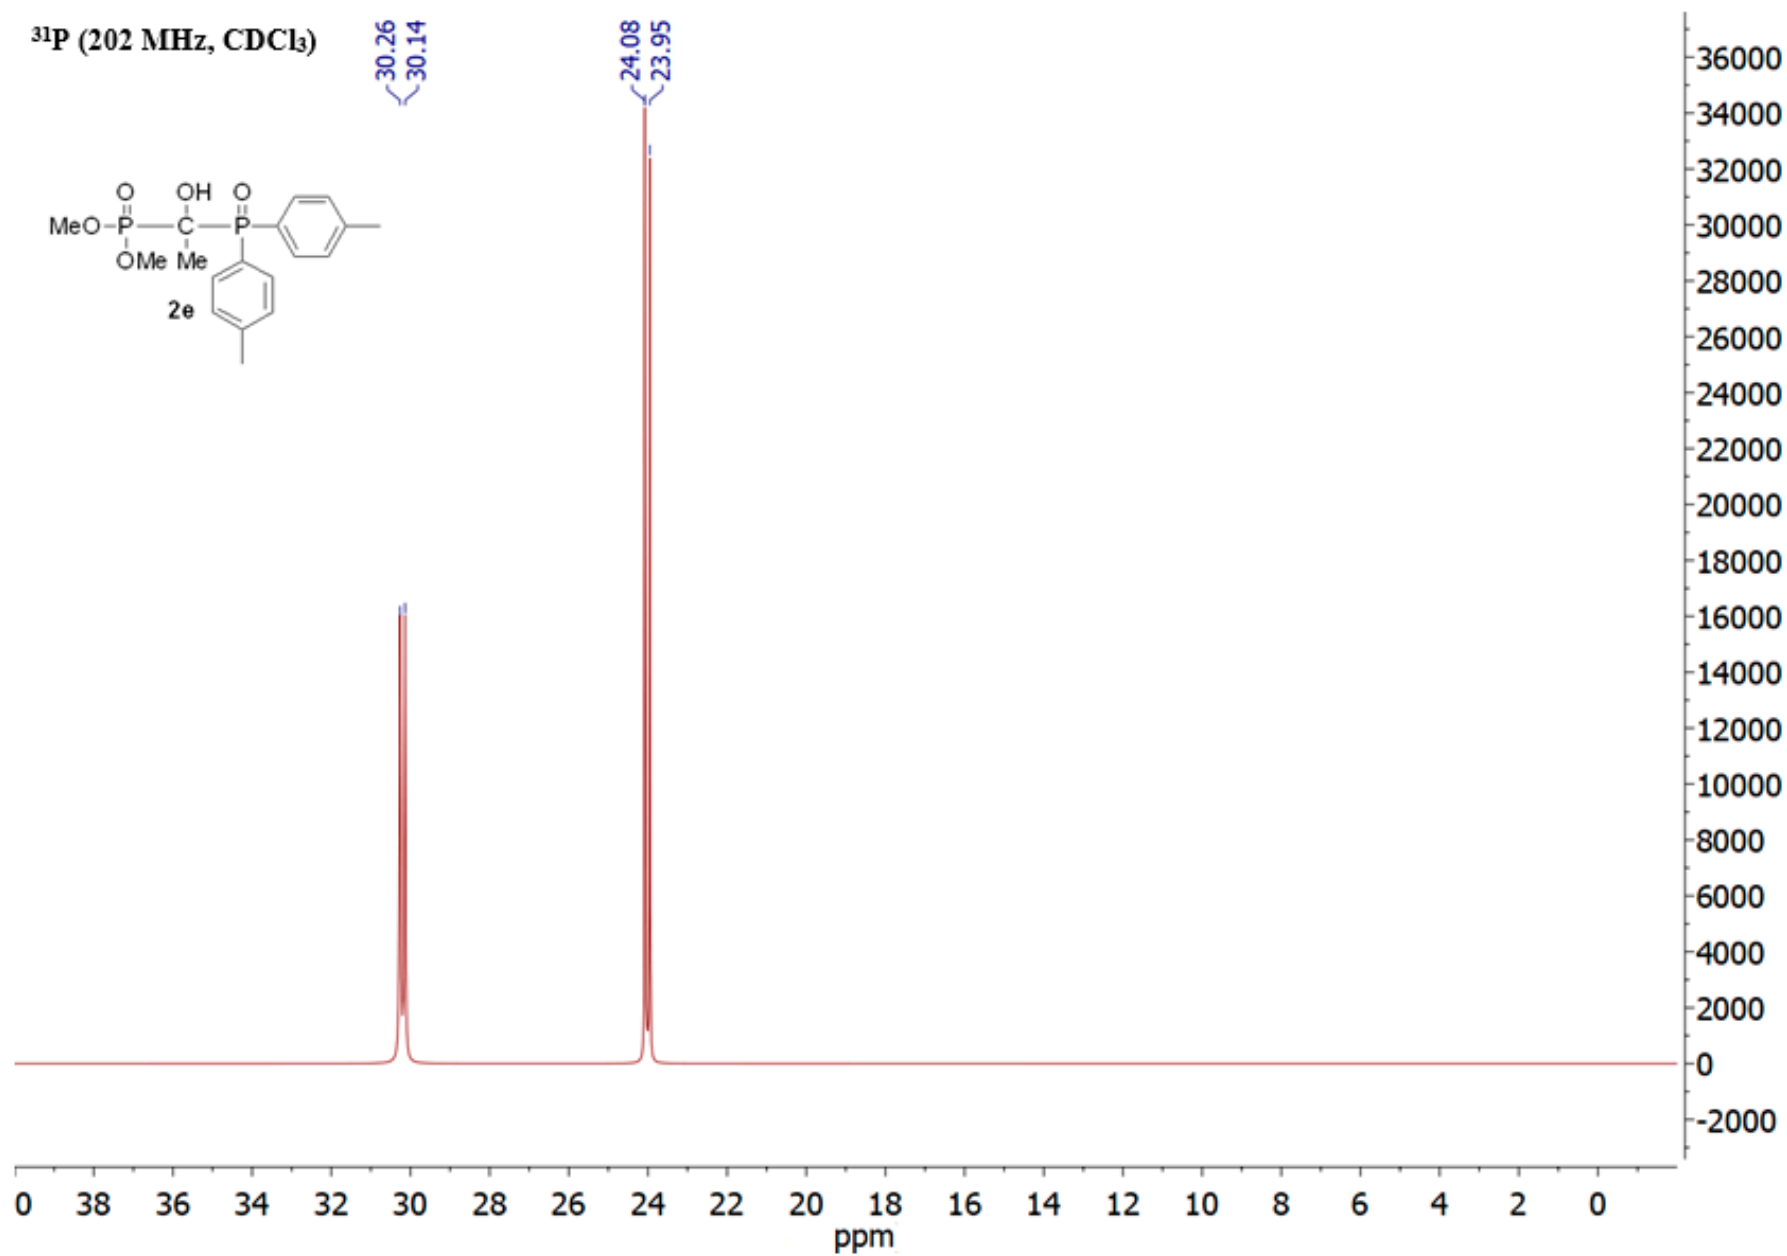

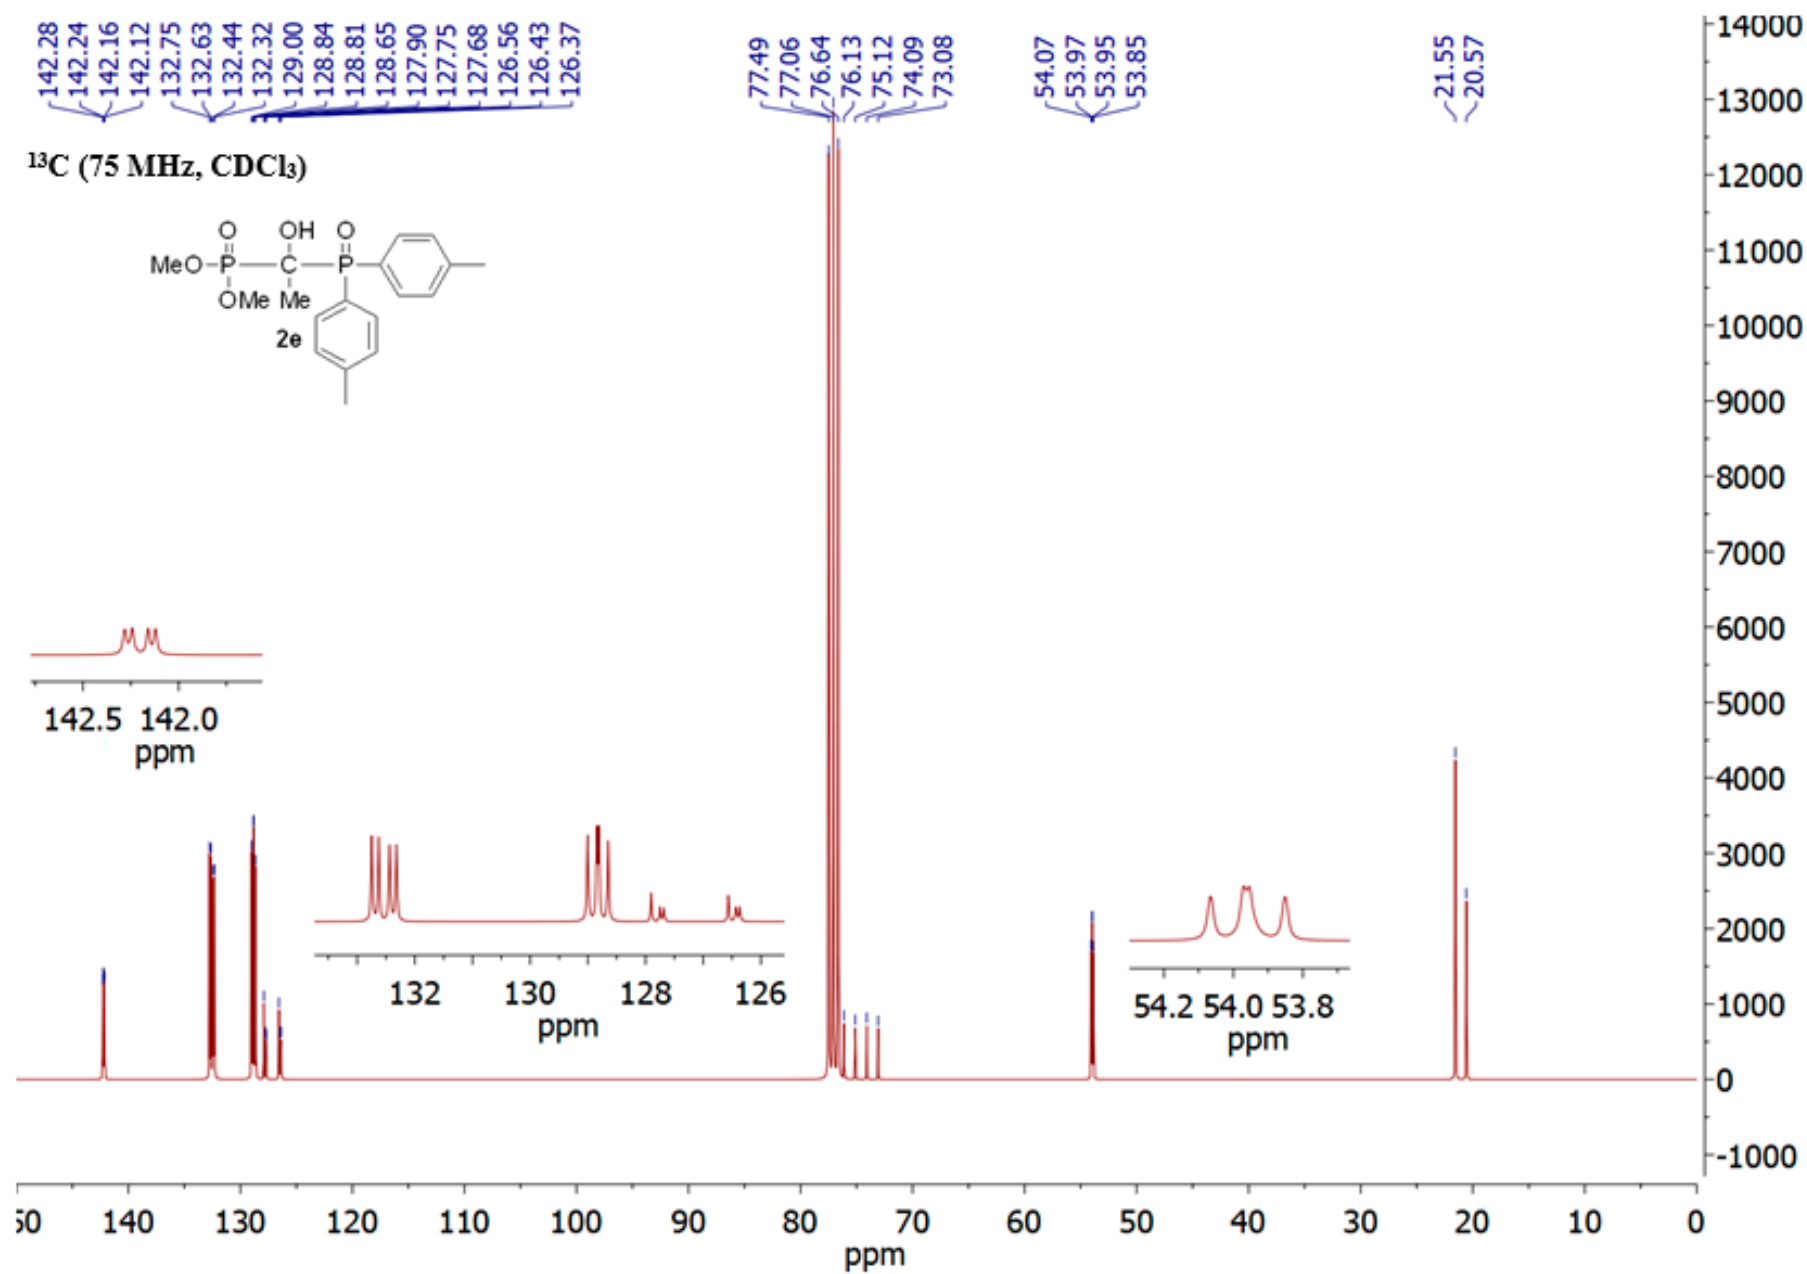

$^1\text{H}$  (500 MHz,  $\text{CDCl}_3$ )

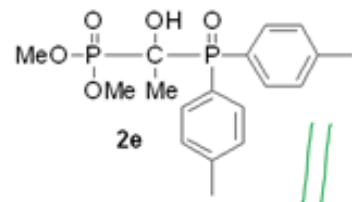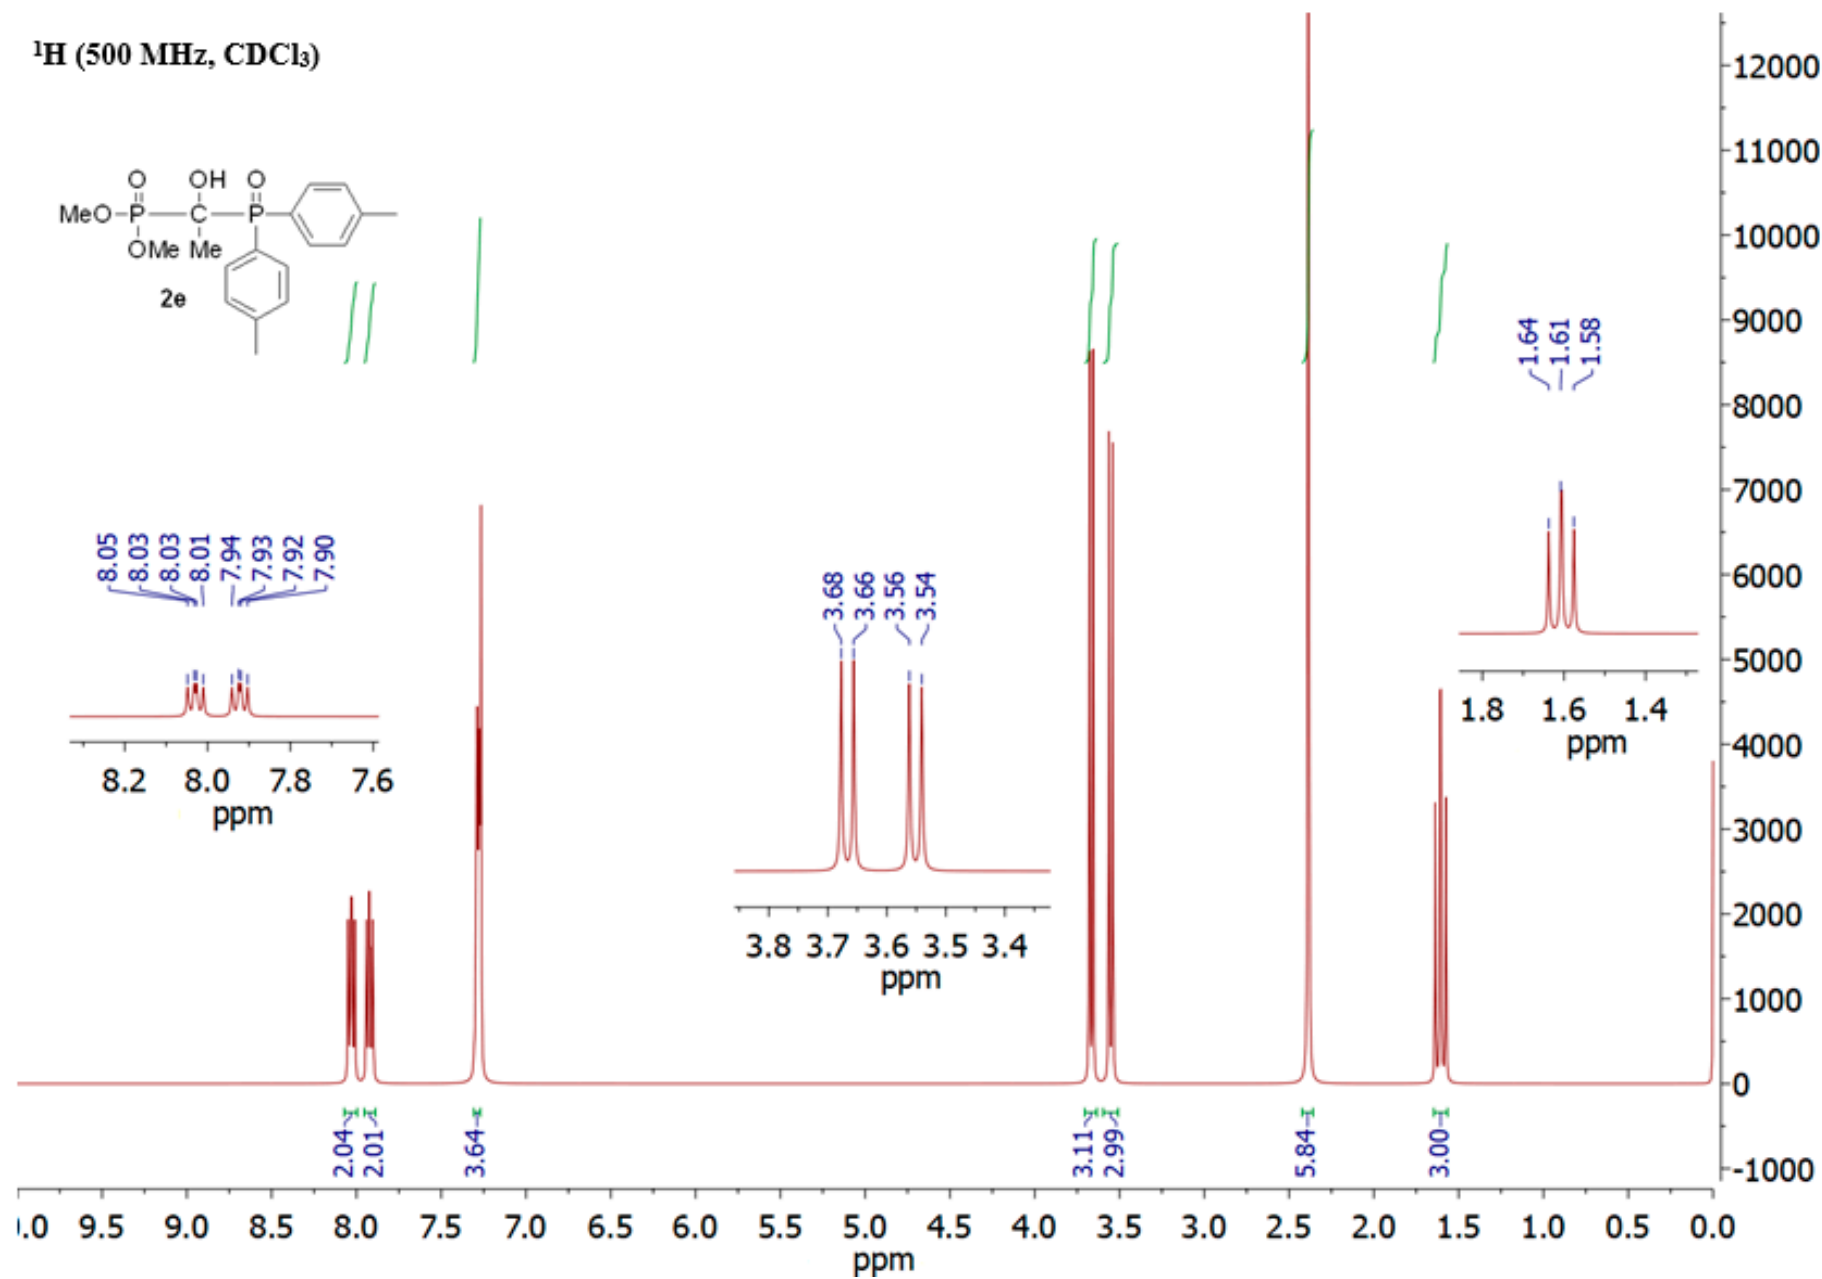

<sup>31</sup>P (202 MHz, CDCl<sub>3</sub>)

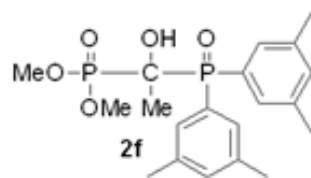

30.09  
29.97

24.36  
24.24

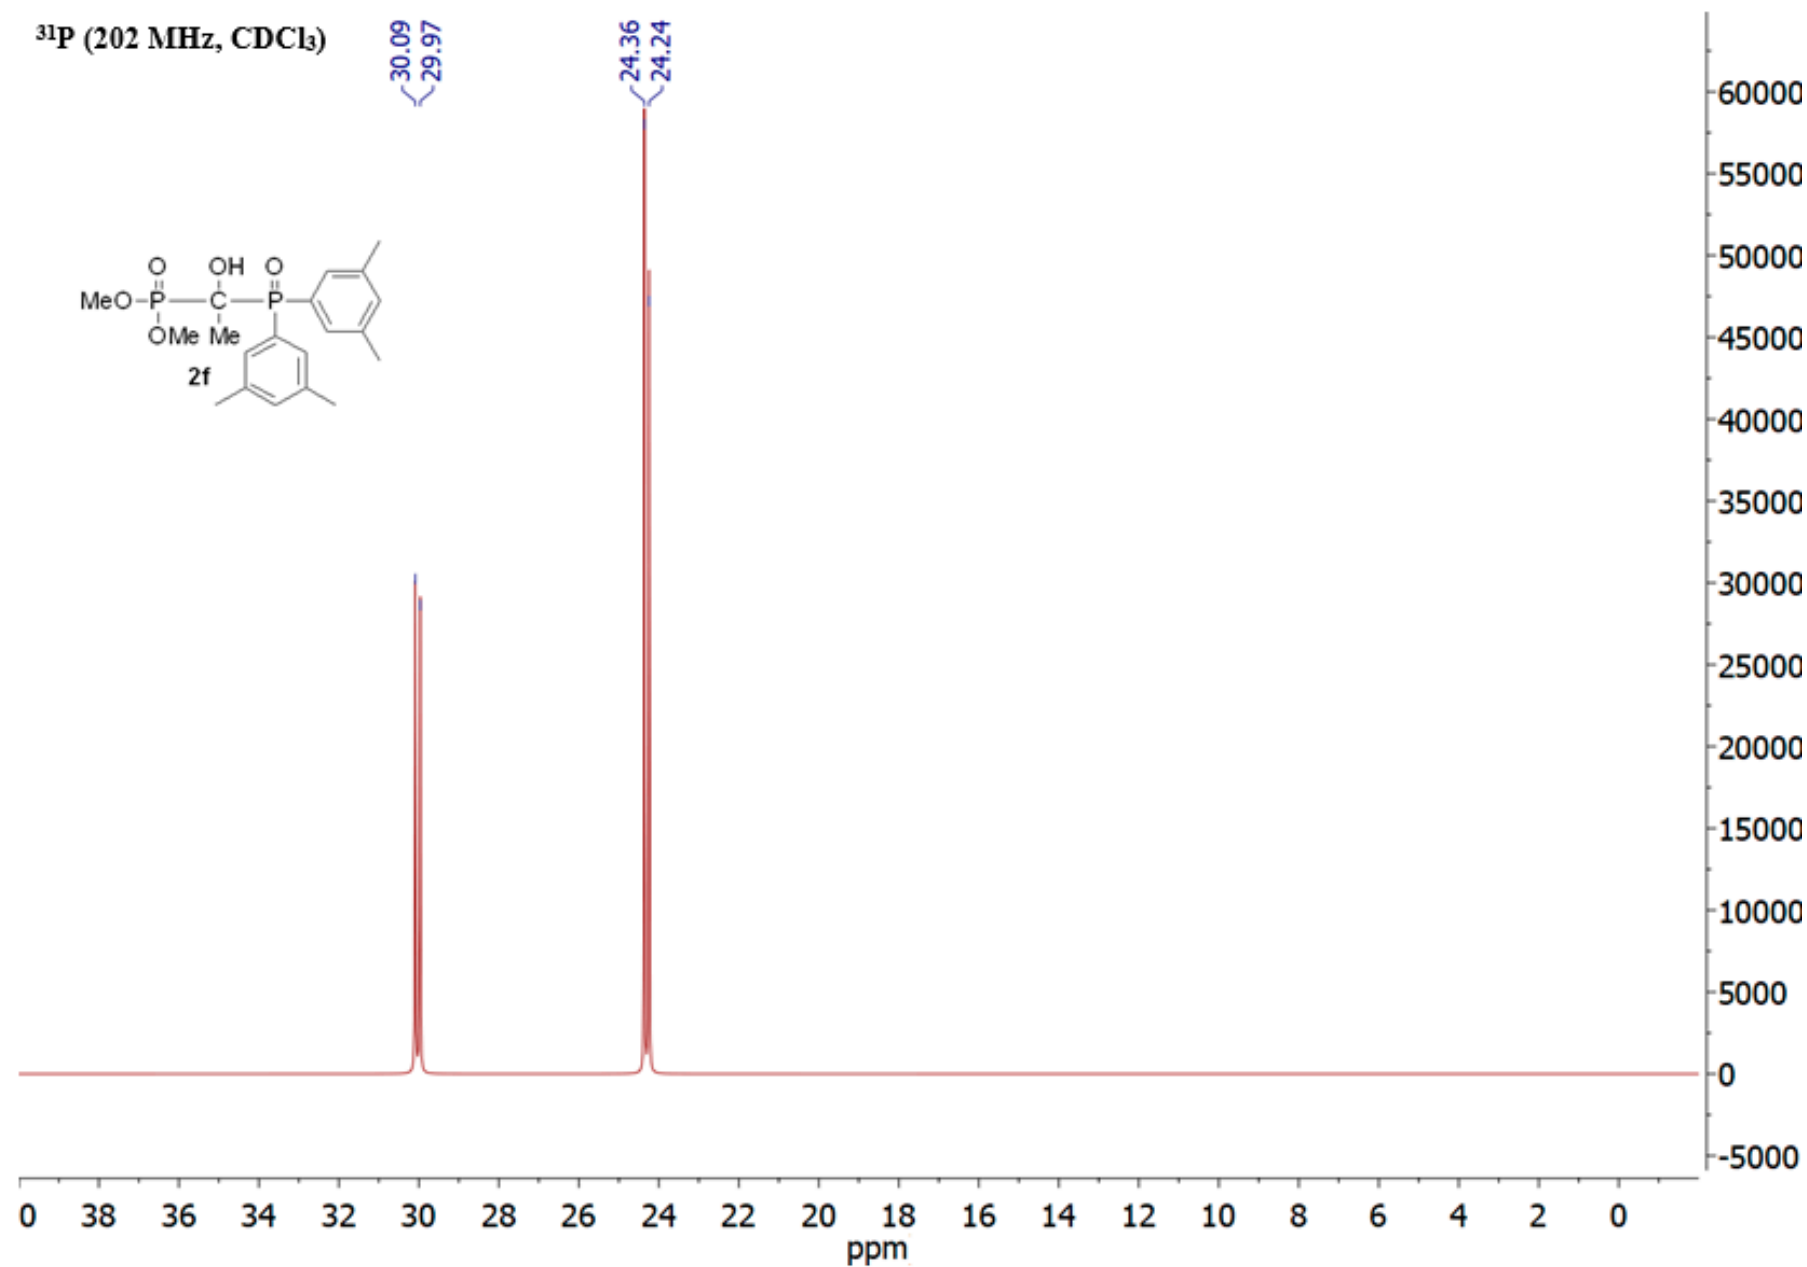

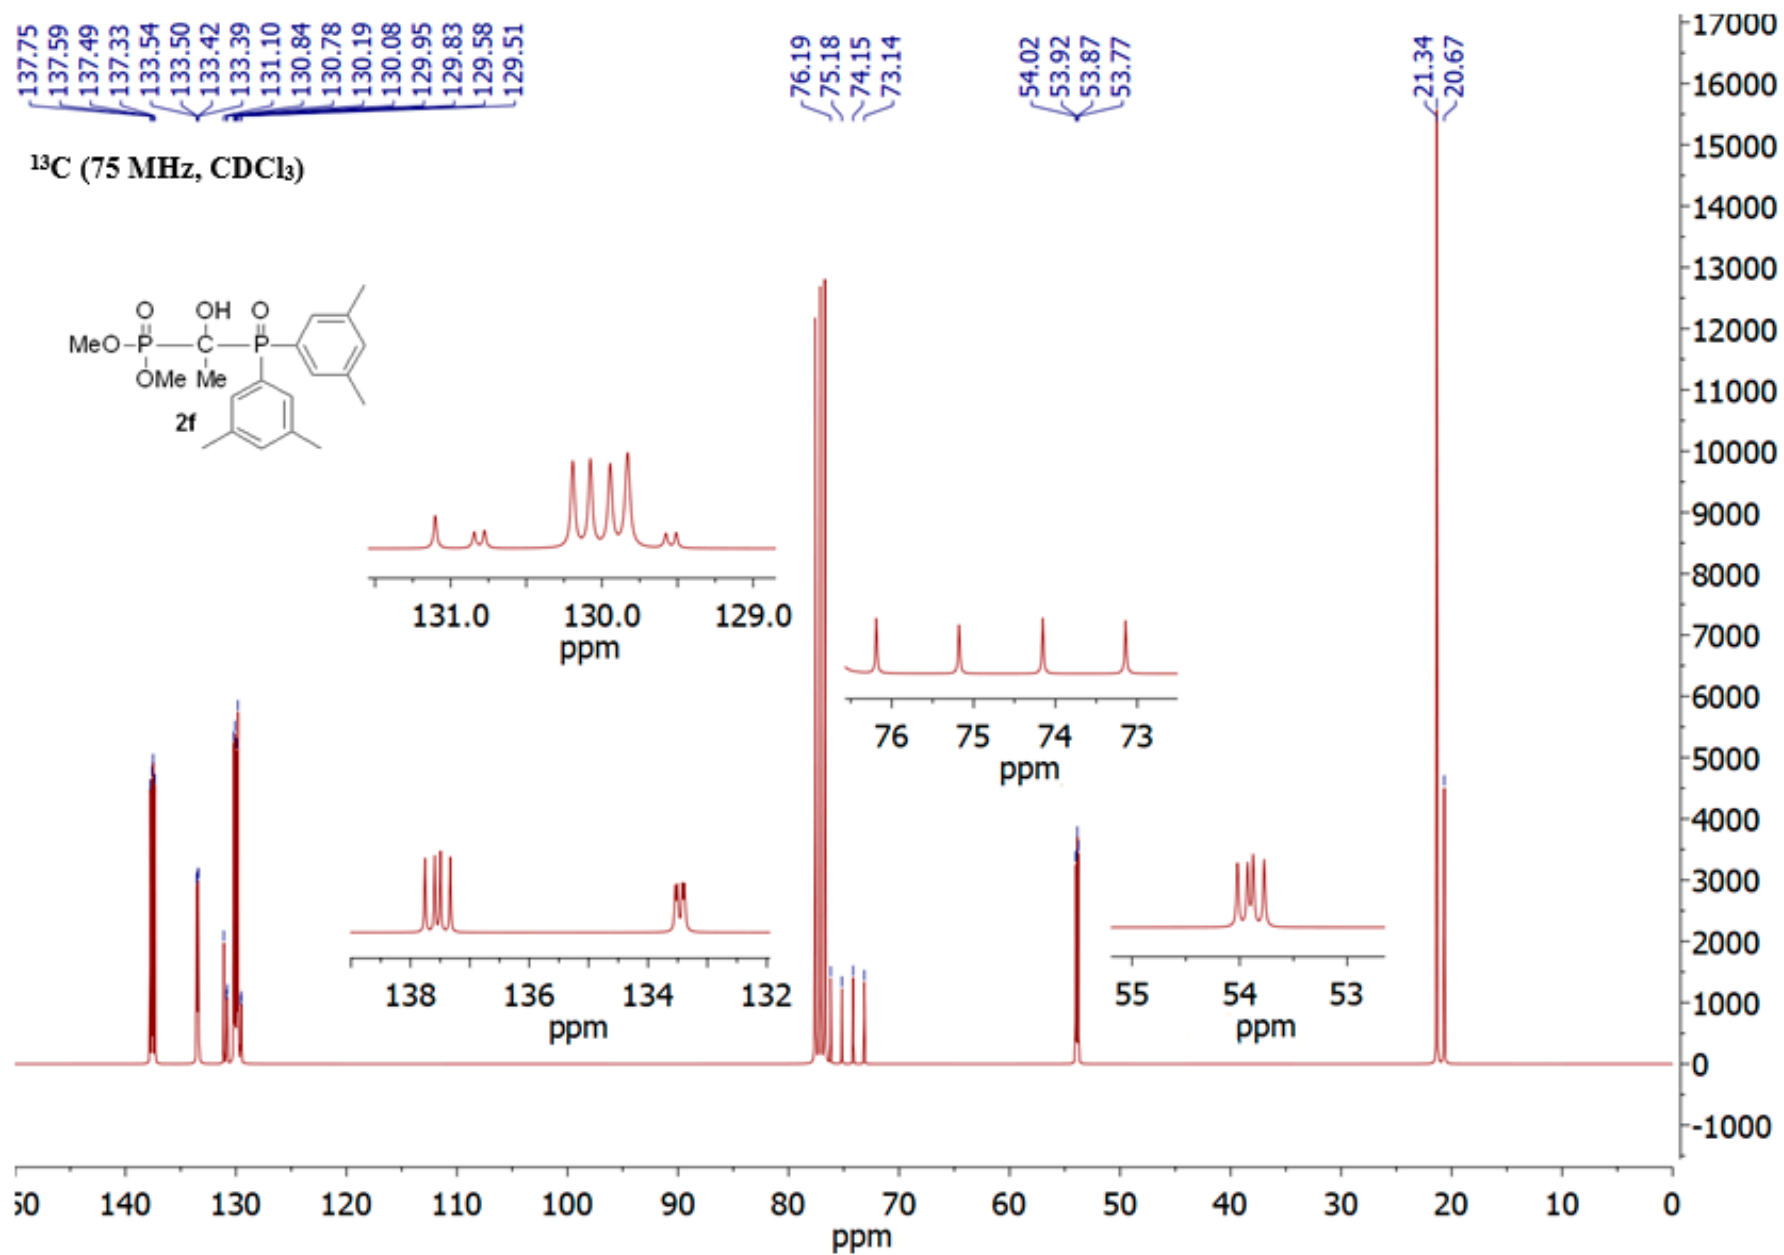

$^1\text{H}$  (500 MHz,  $\text{CDCl}_3$ )

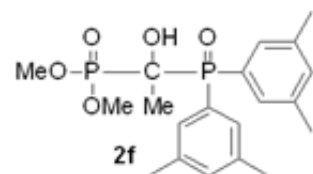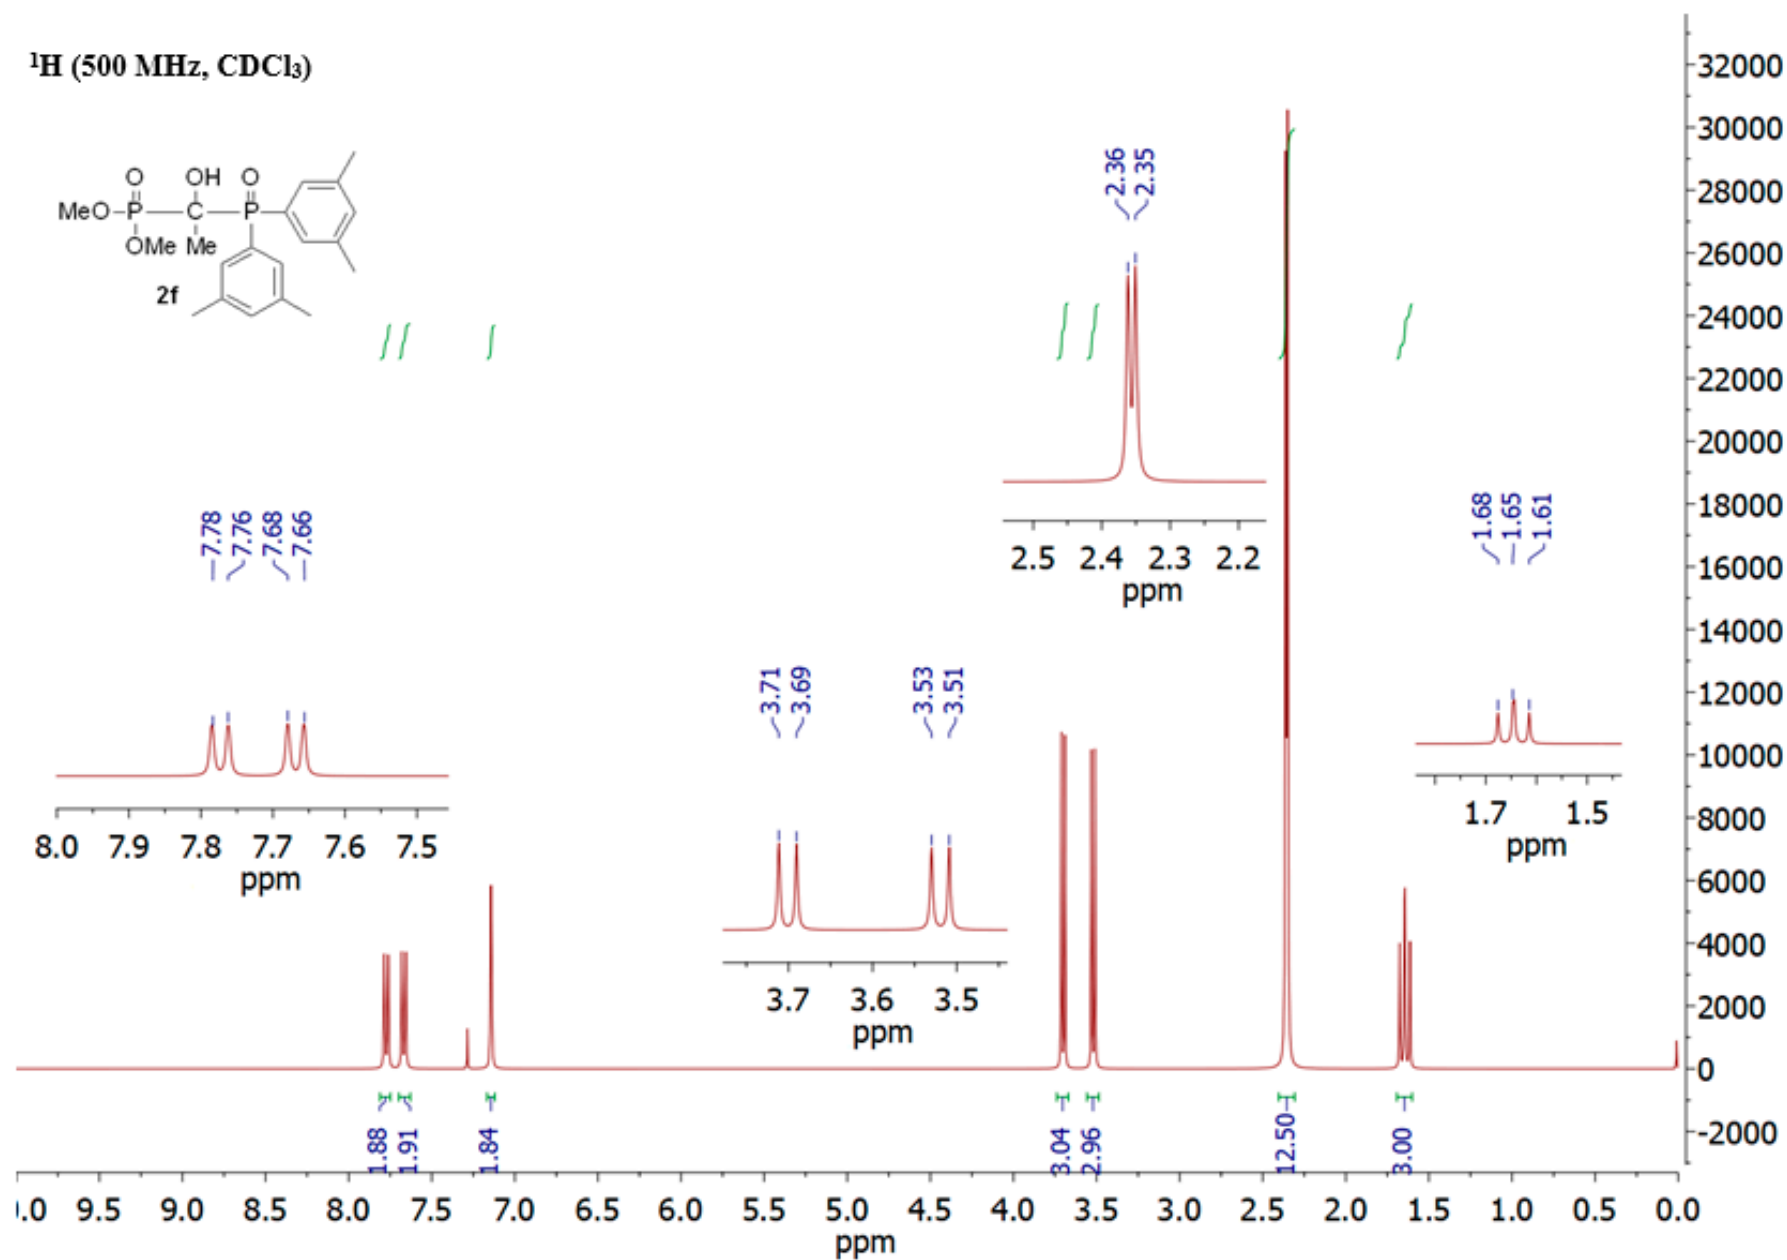

$^{31}\text{P}$  (202 MHz,  $\text{CDCl}_3$ )

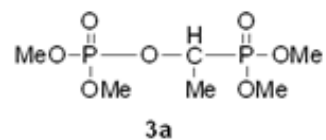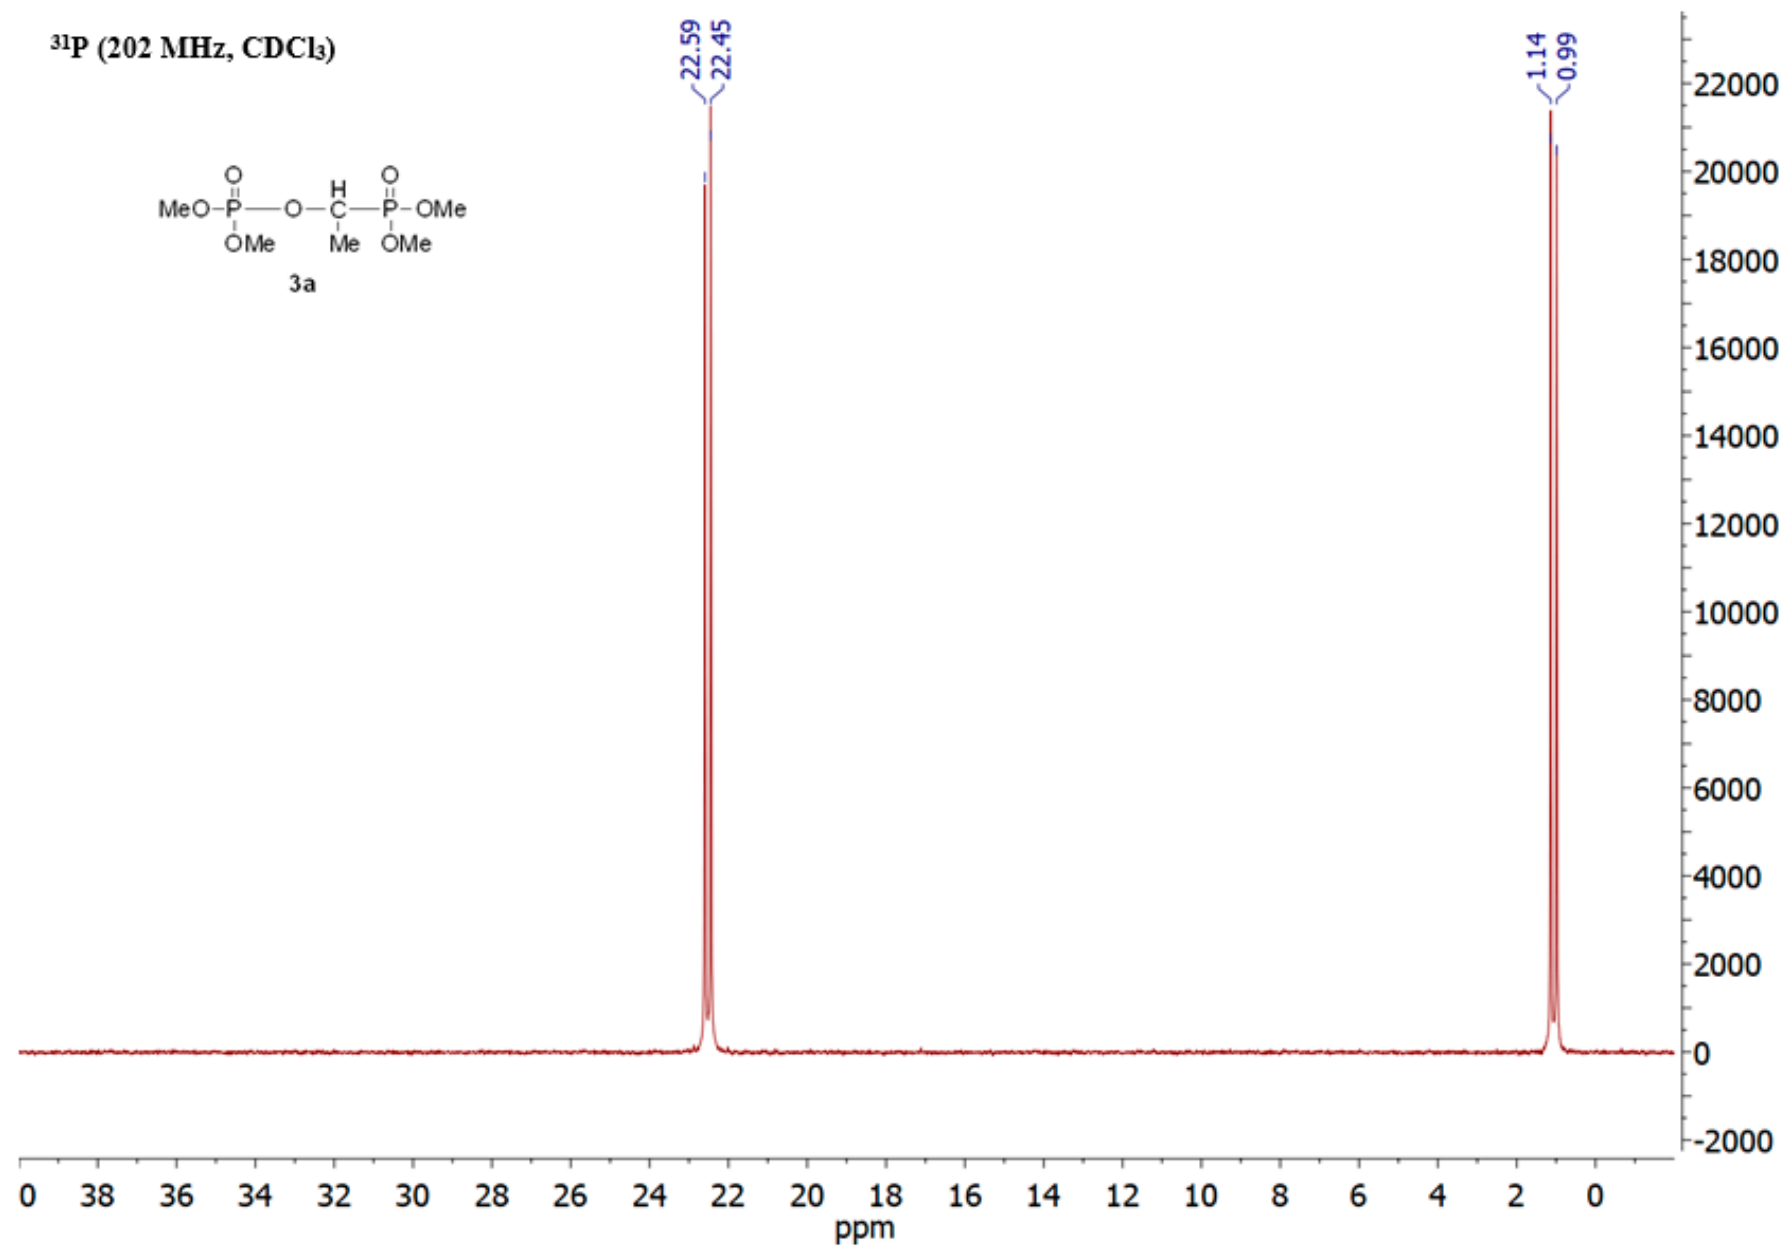



$^{13}\text{C}$  (126 MHz,  $\text{CDCl}_3$ )

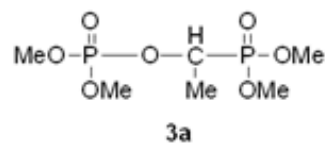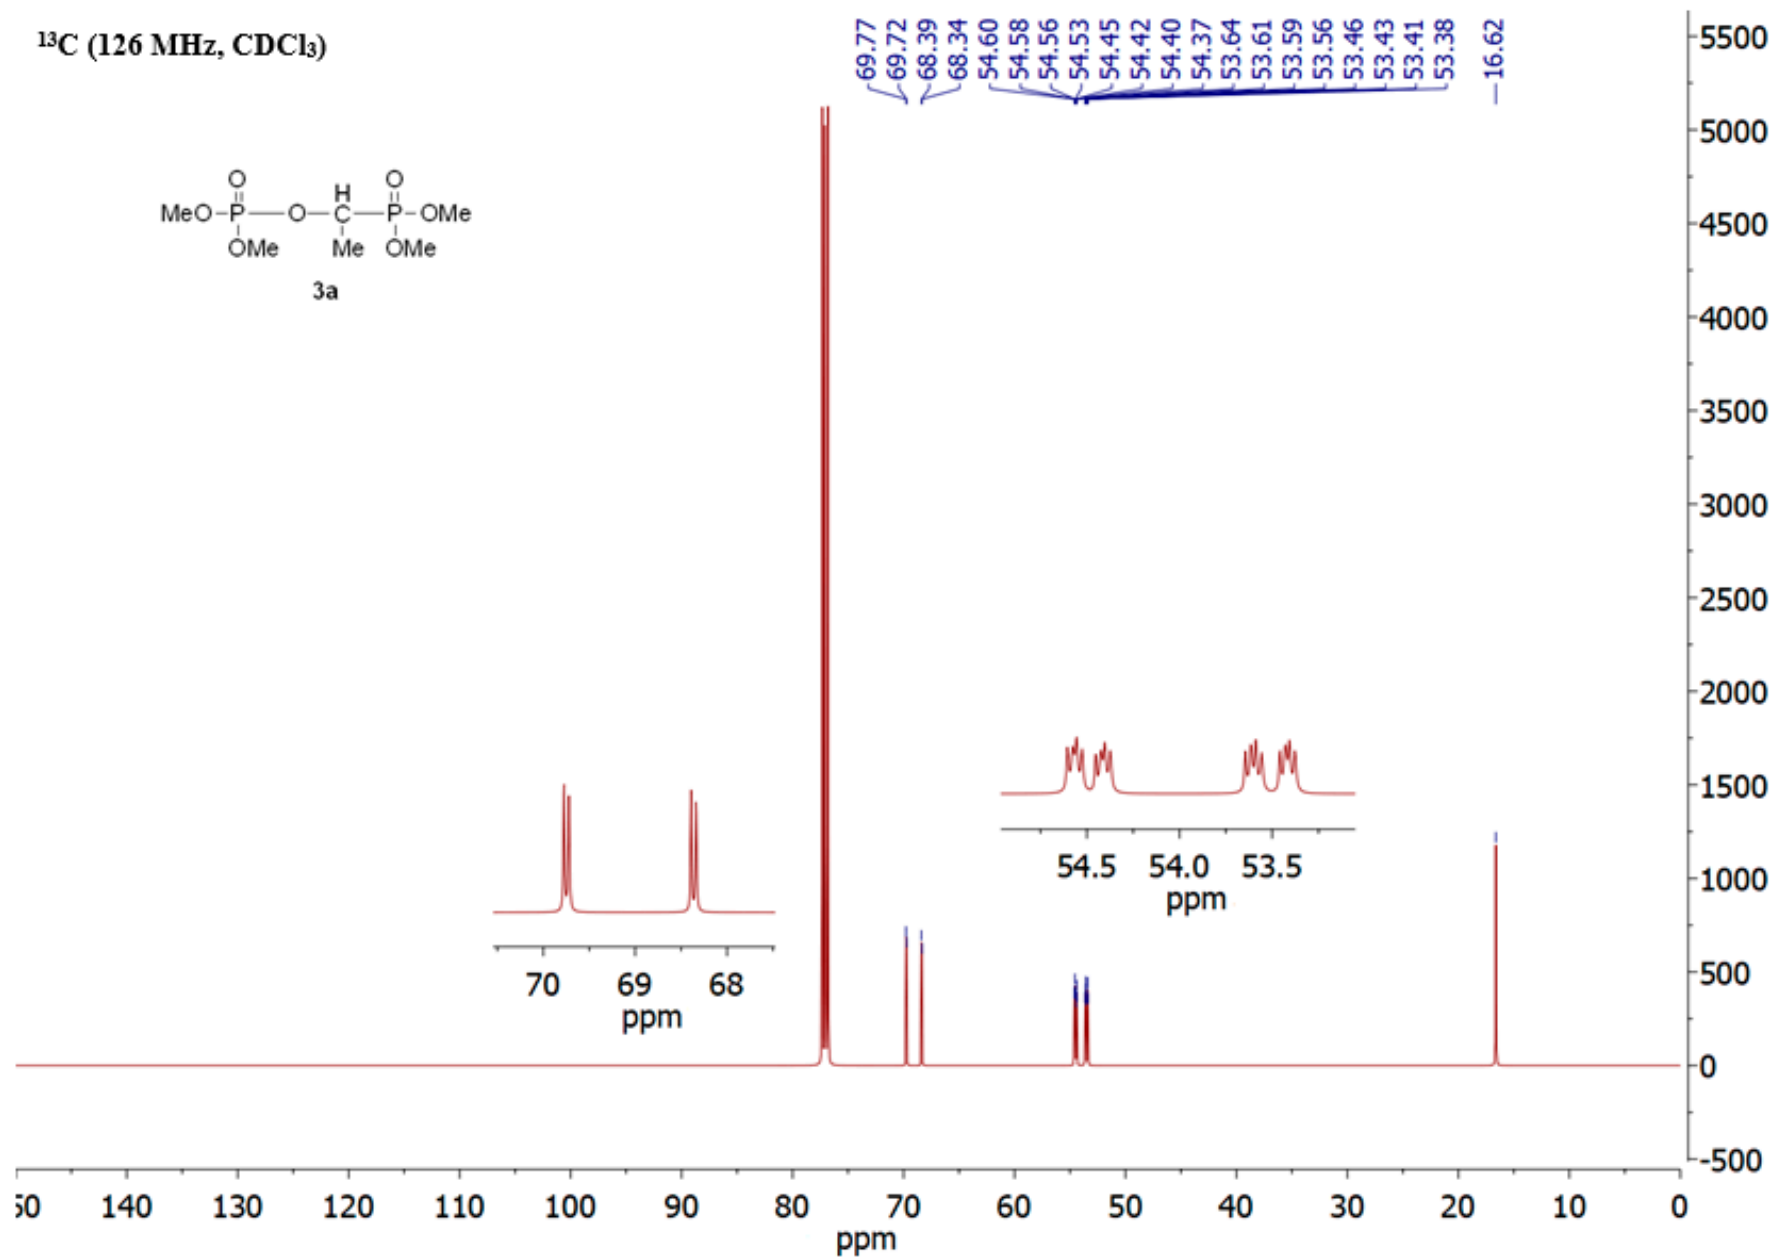

$^1\text{H}$  (500 MHz,  $\text{CDCl}_3$ )

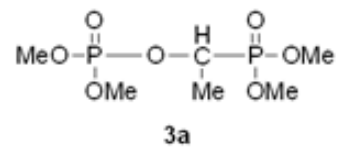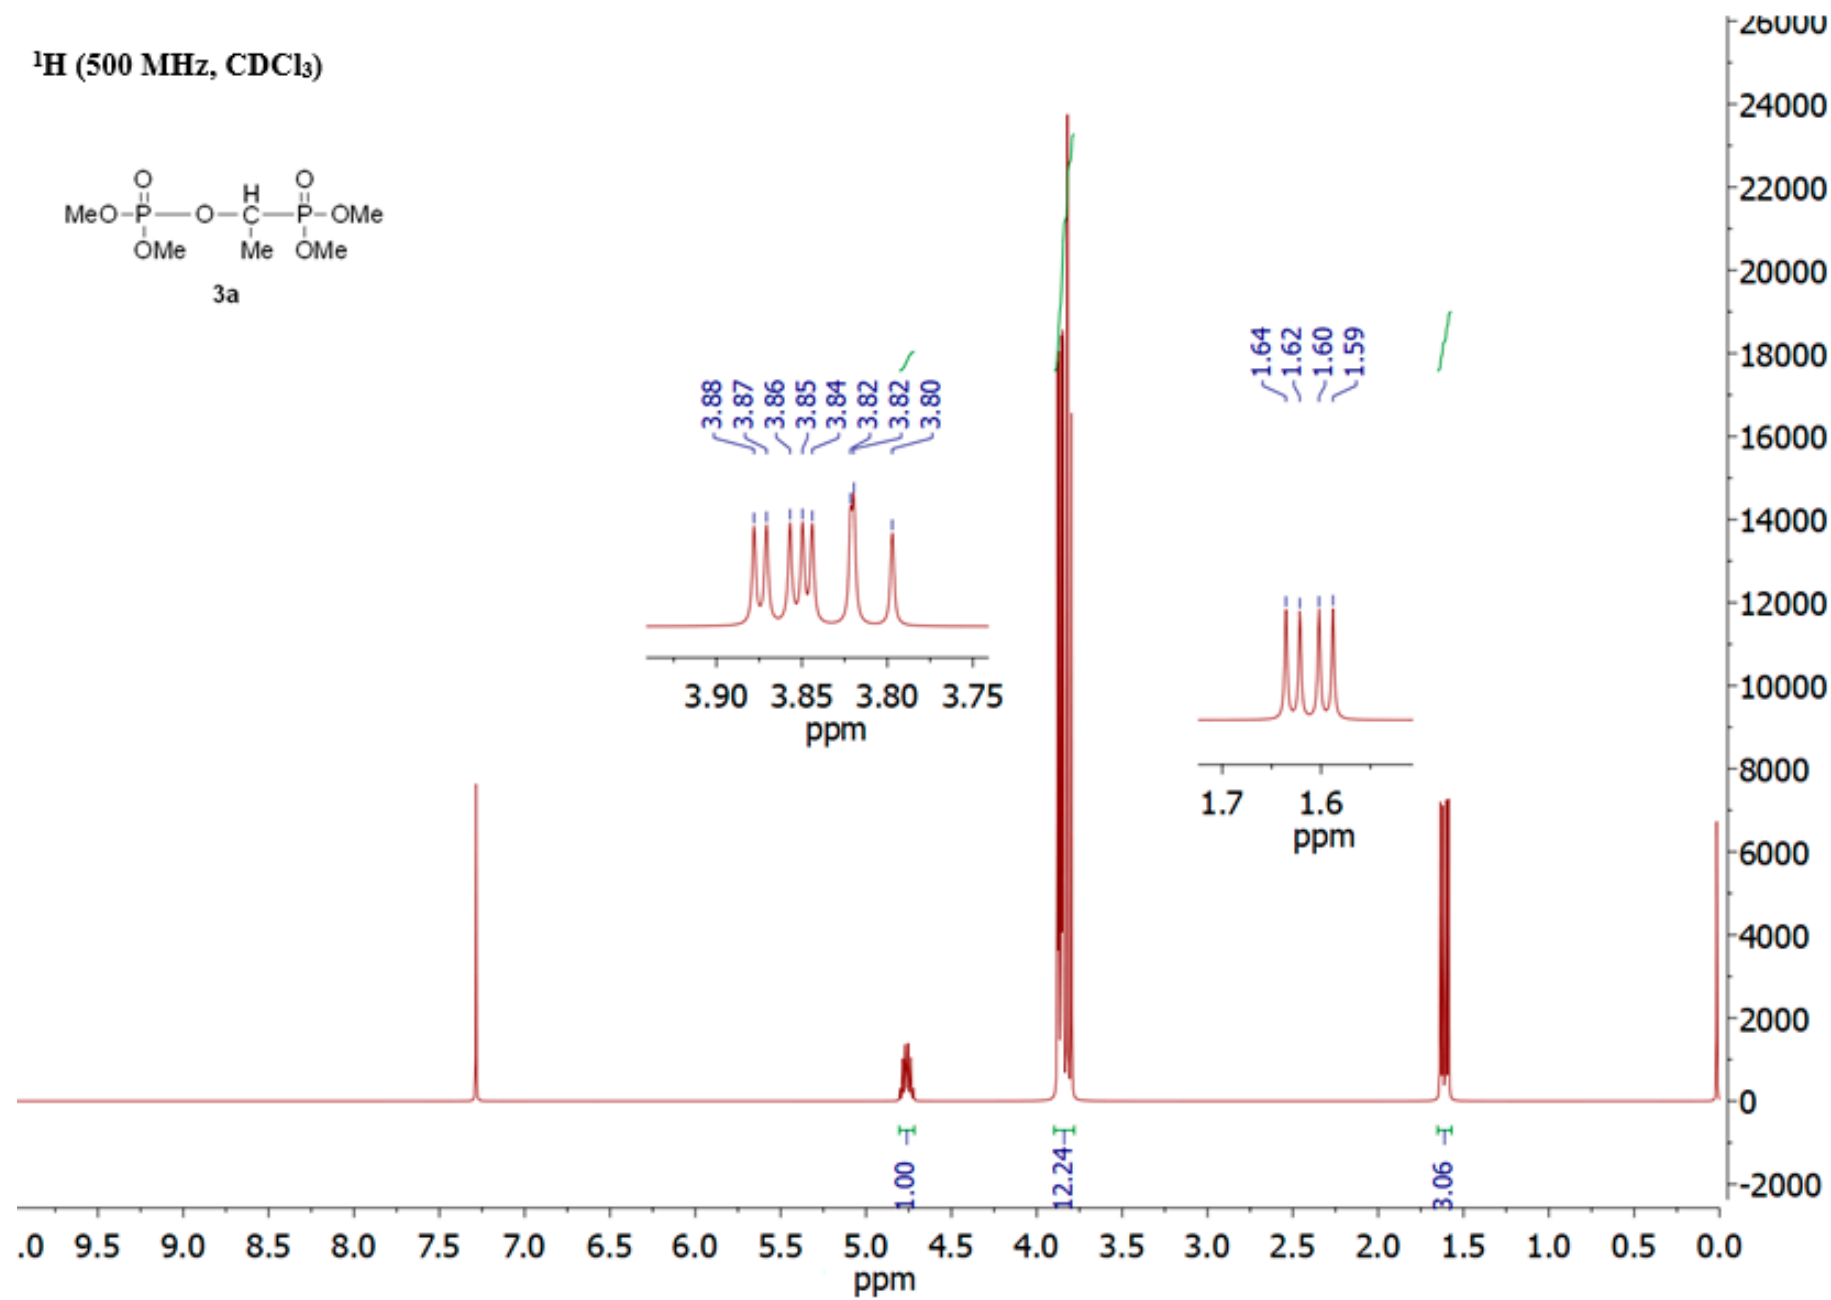

<sup>31</sup>P (202 MHz, CDCl<sub>3</sub>)

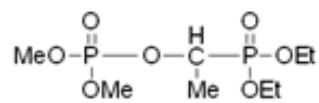

**3b-1**

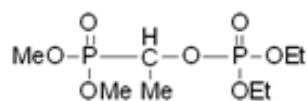

**3b-2**

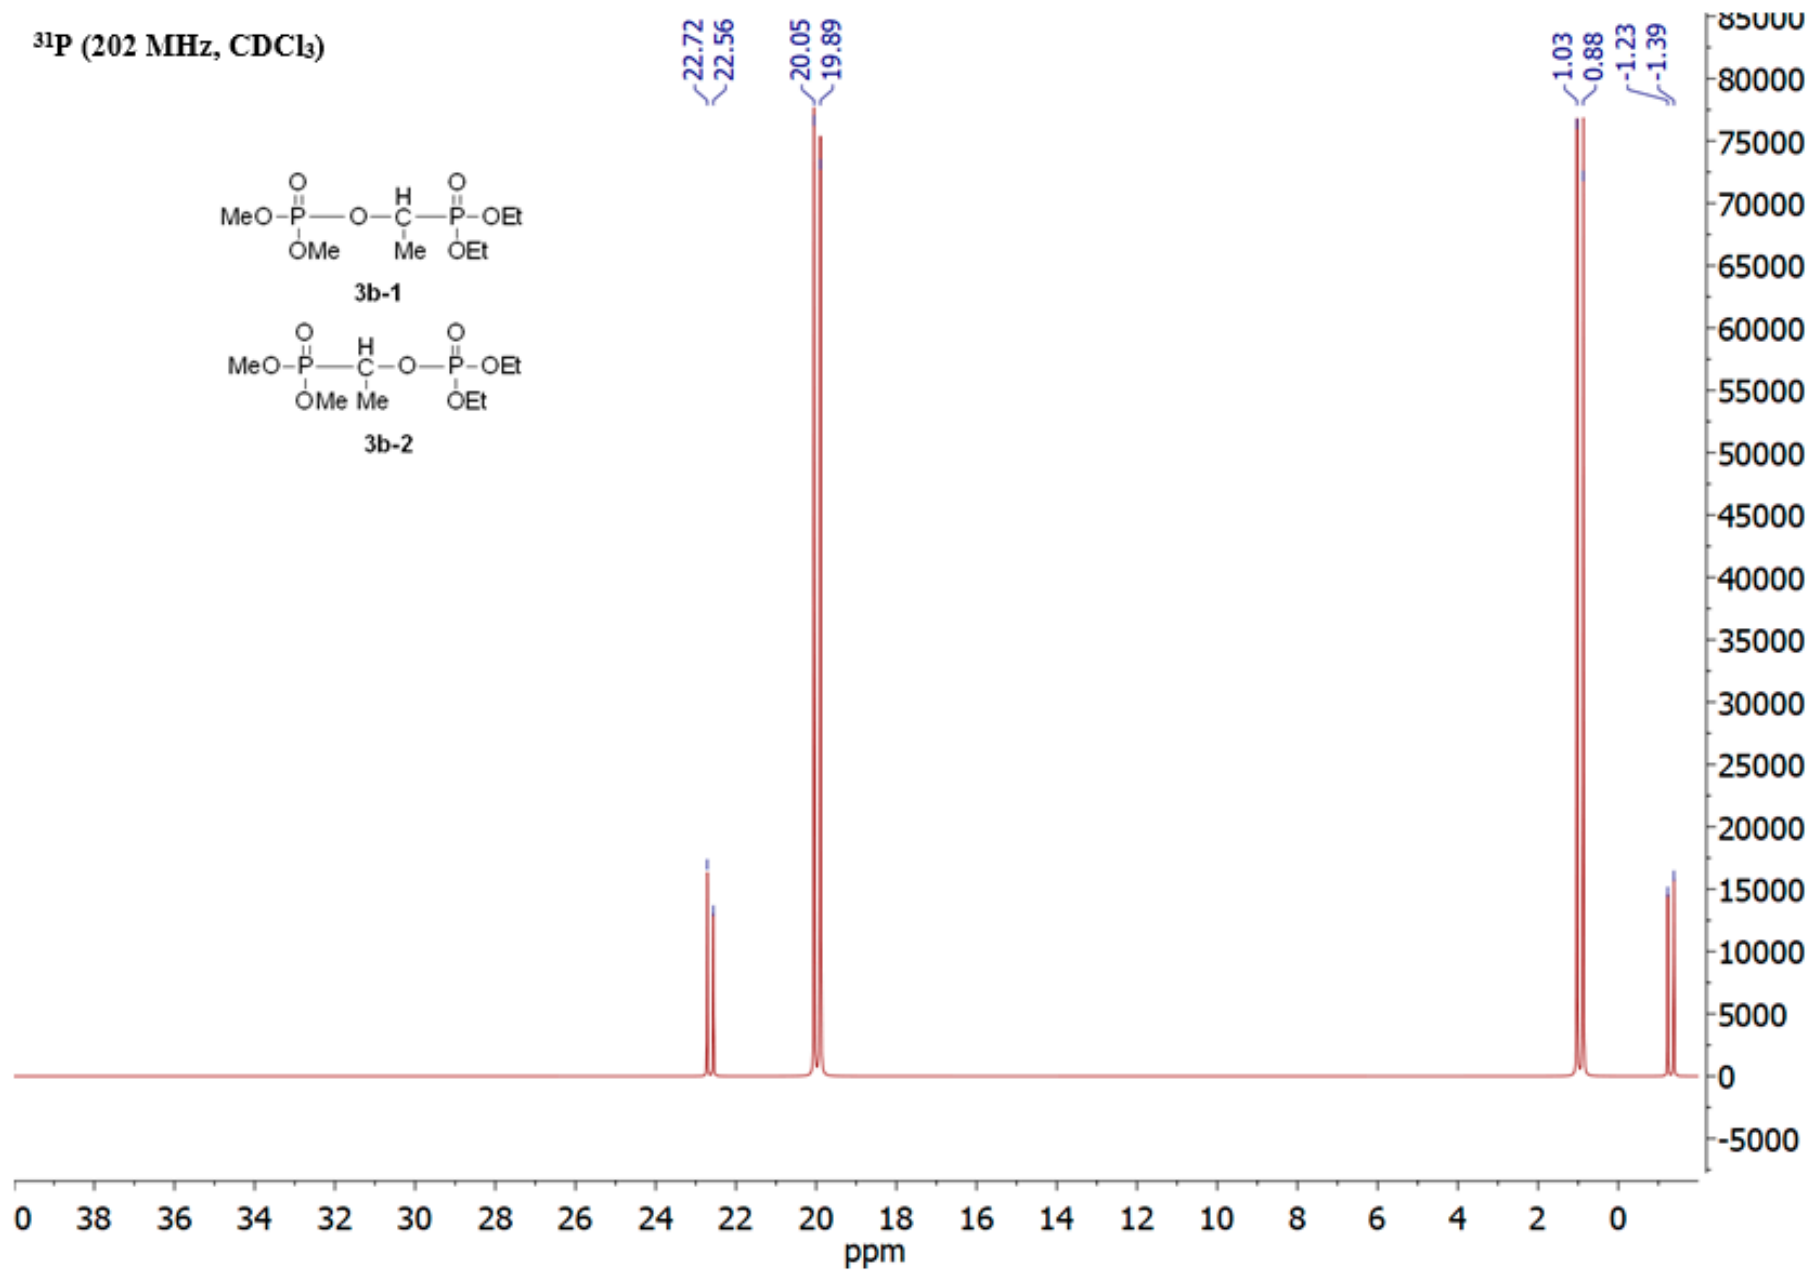

$^{13}\text{C}$  (75 MHz,  $\text{CDCl}_3$ )

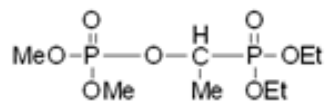

3b-1

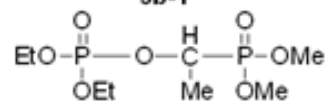

3b-2

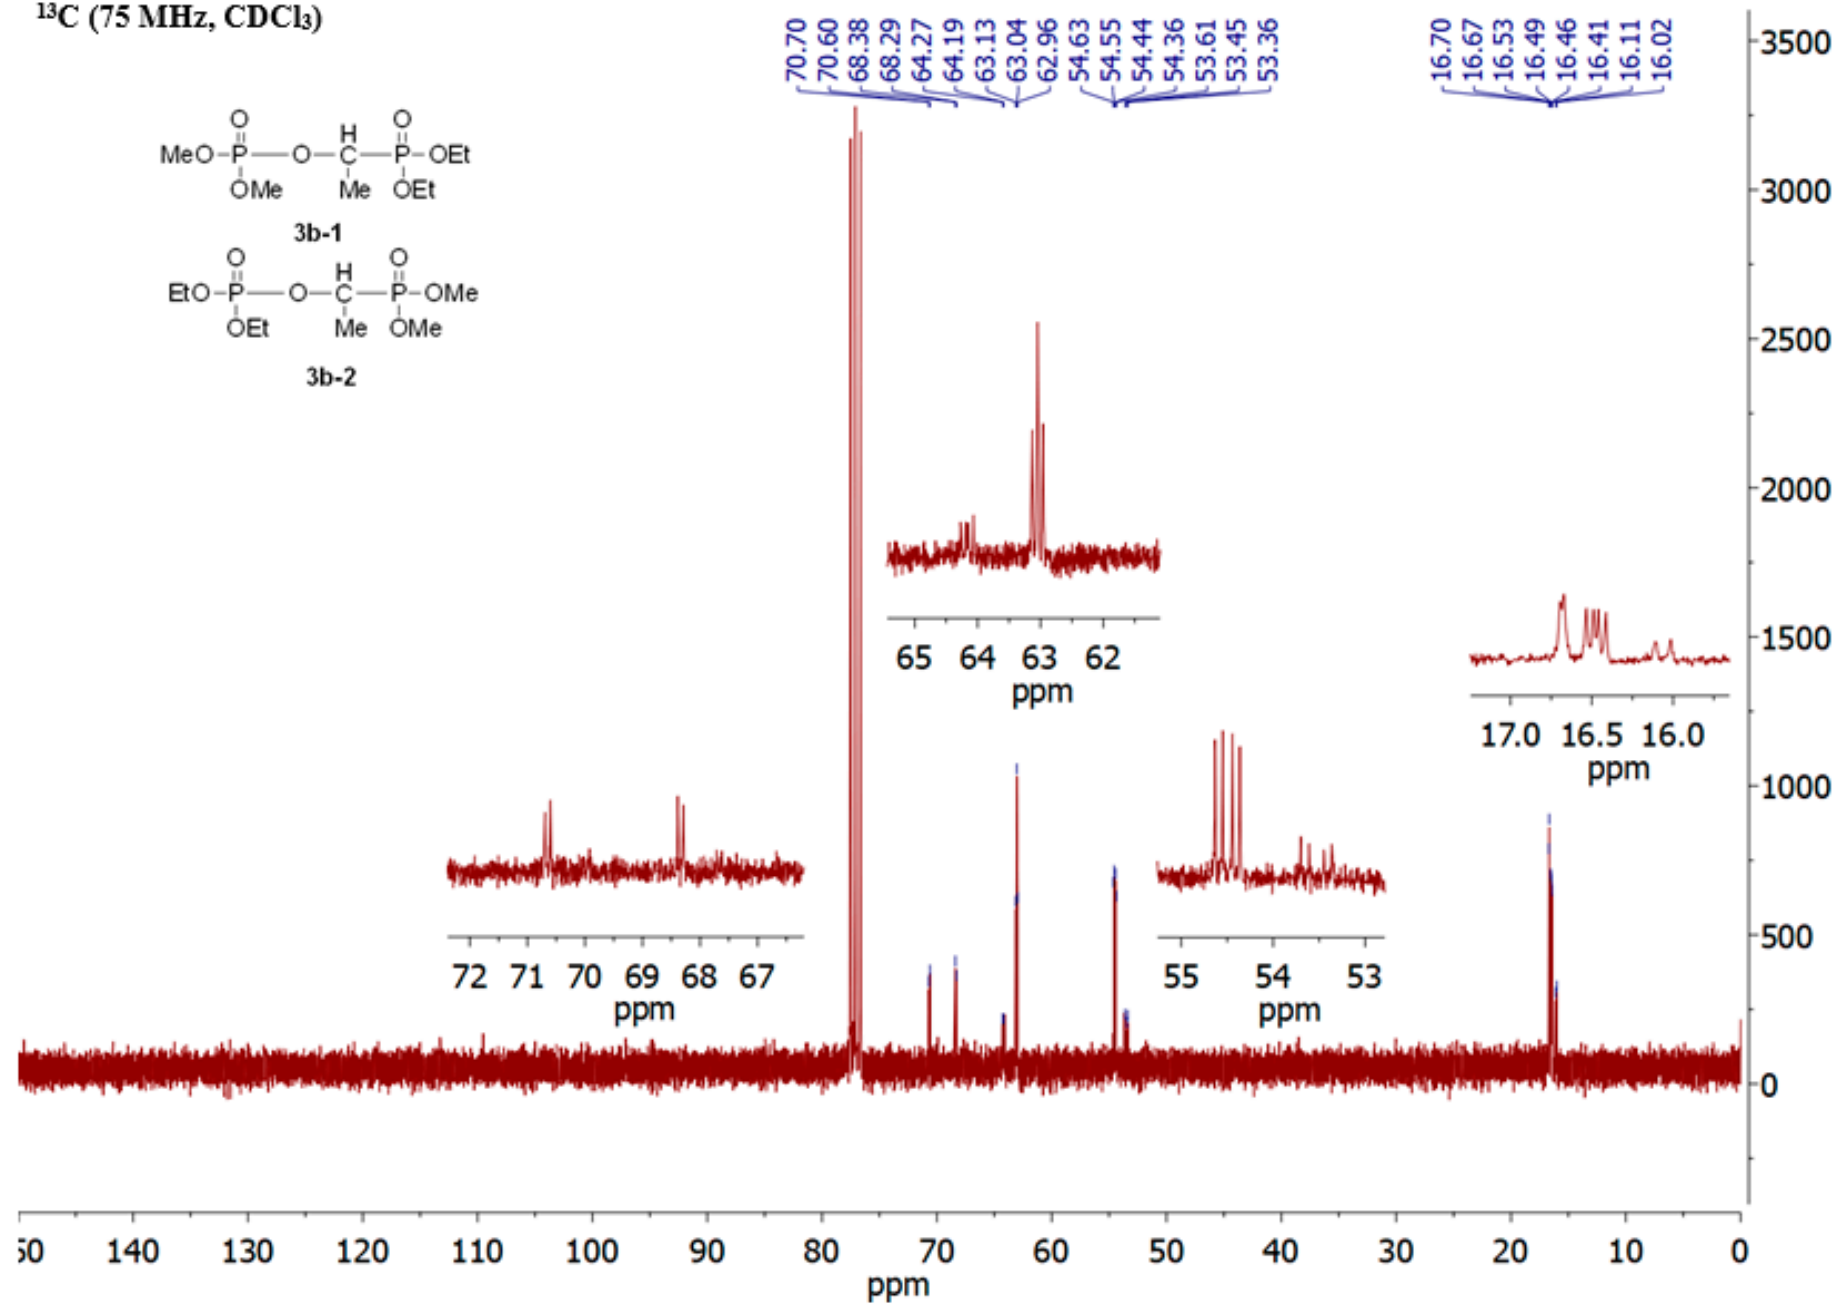

$^1\text{H}$  (500 MHz,  $\text{CDCl}_3$ )

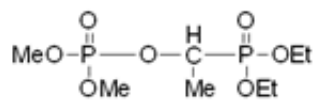

3b-1

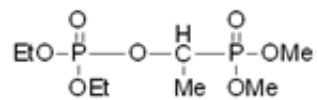

3b-2

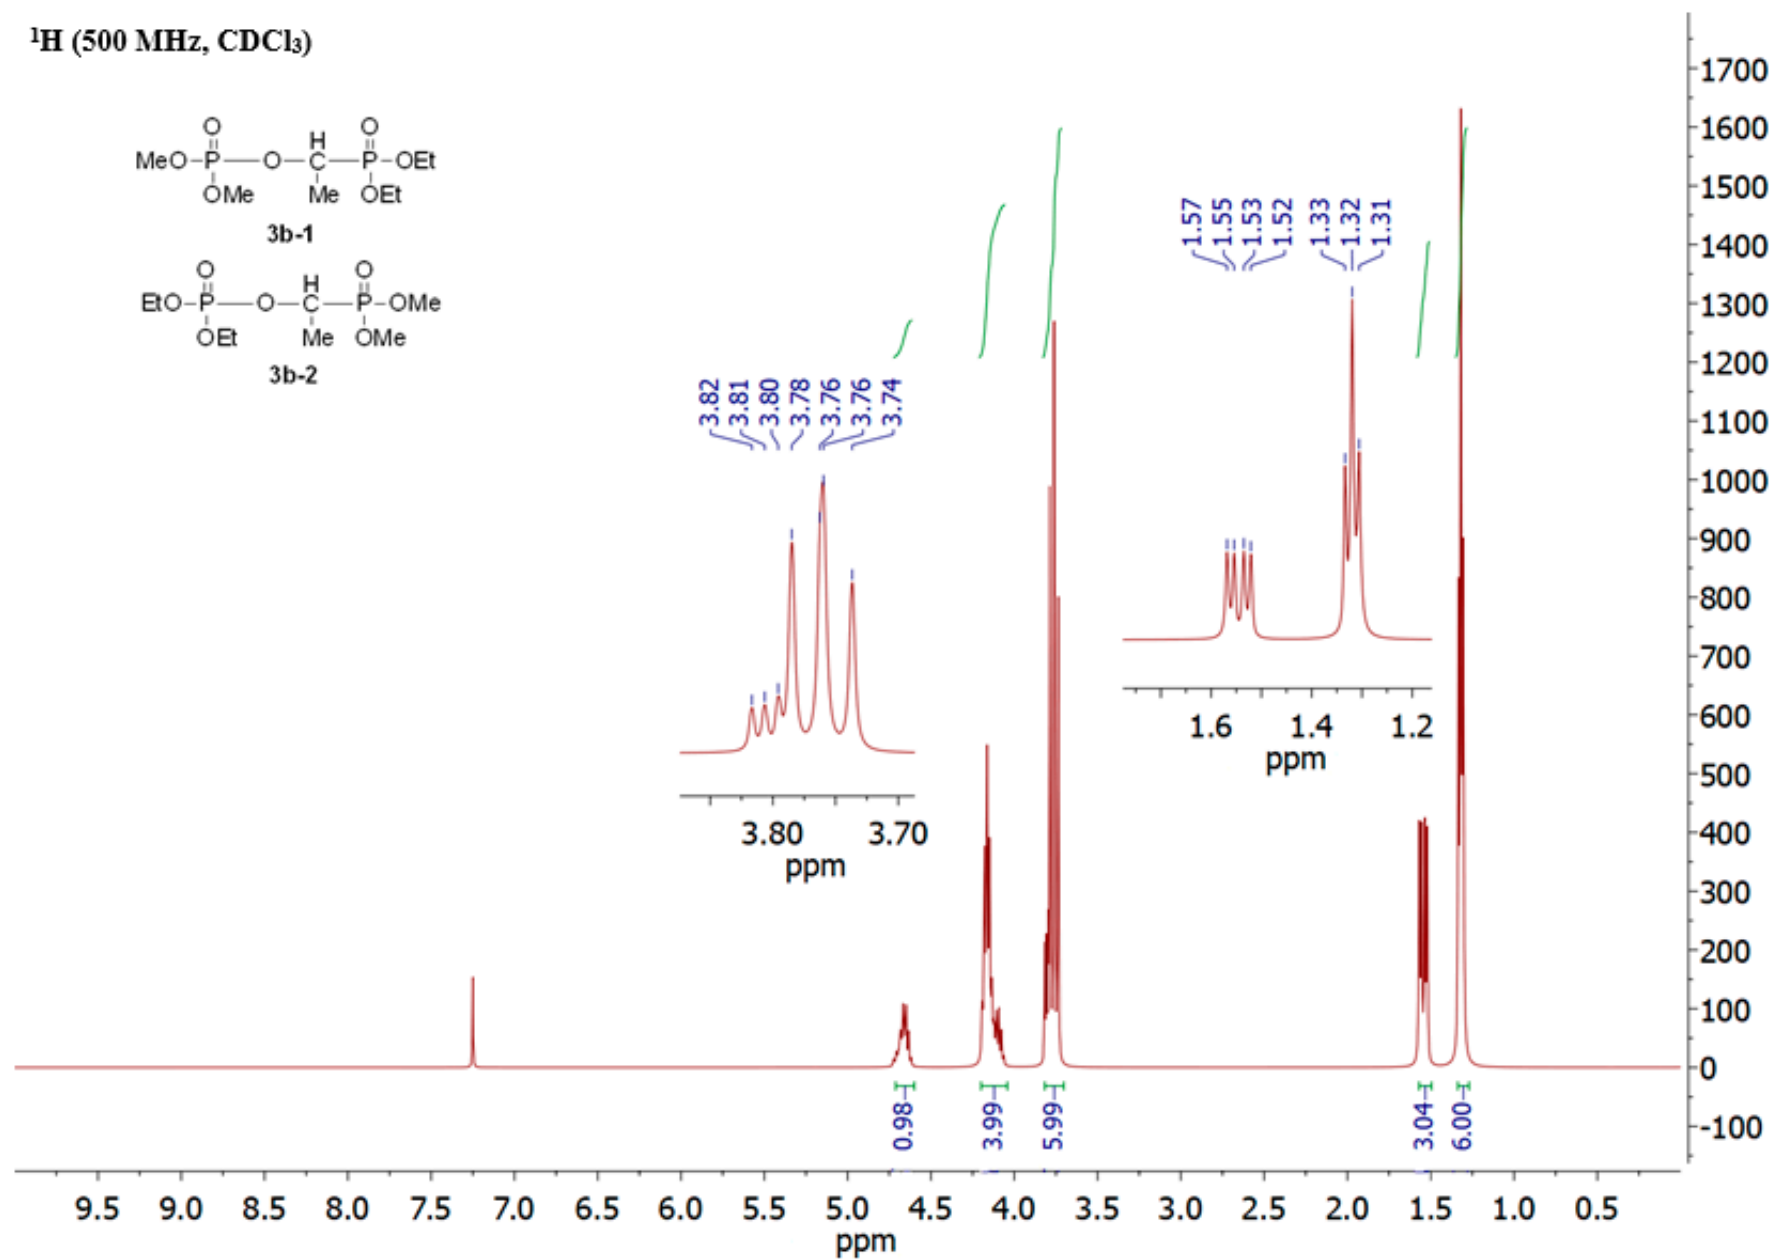

<sup>31</sup>P (202 MHz, CDCl<sub>3</sub>)

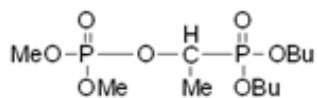

3c-1

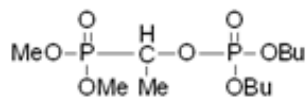

3c-2

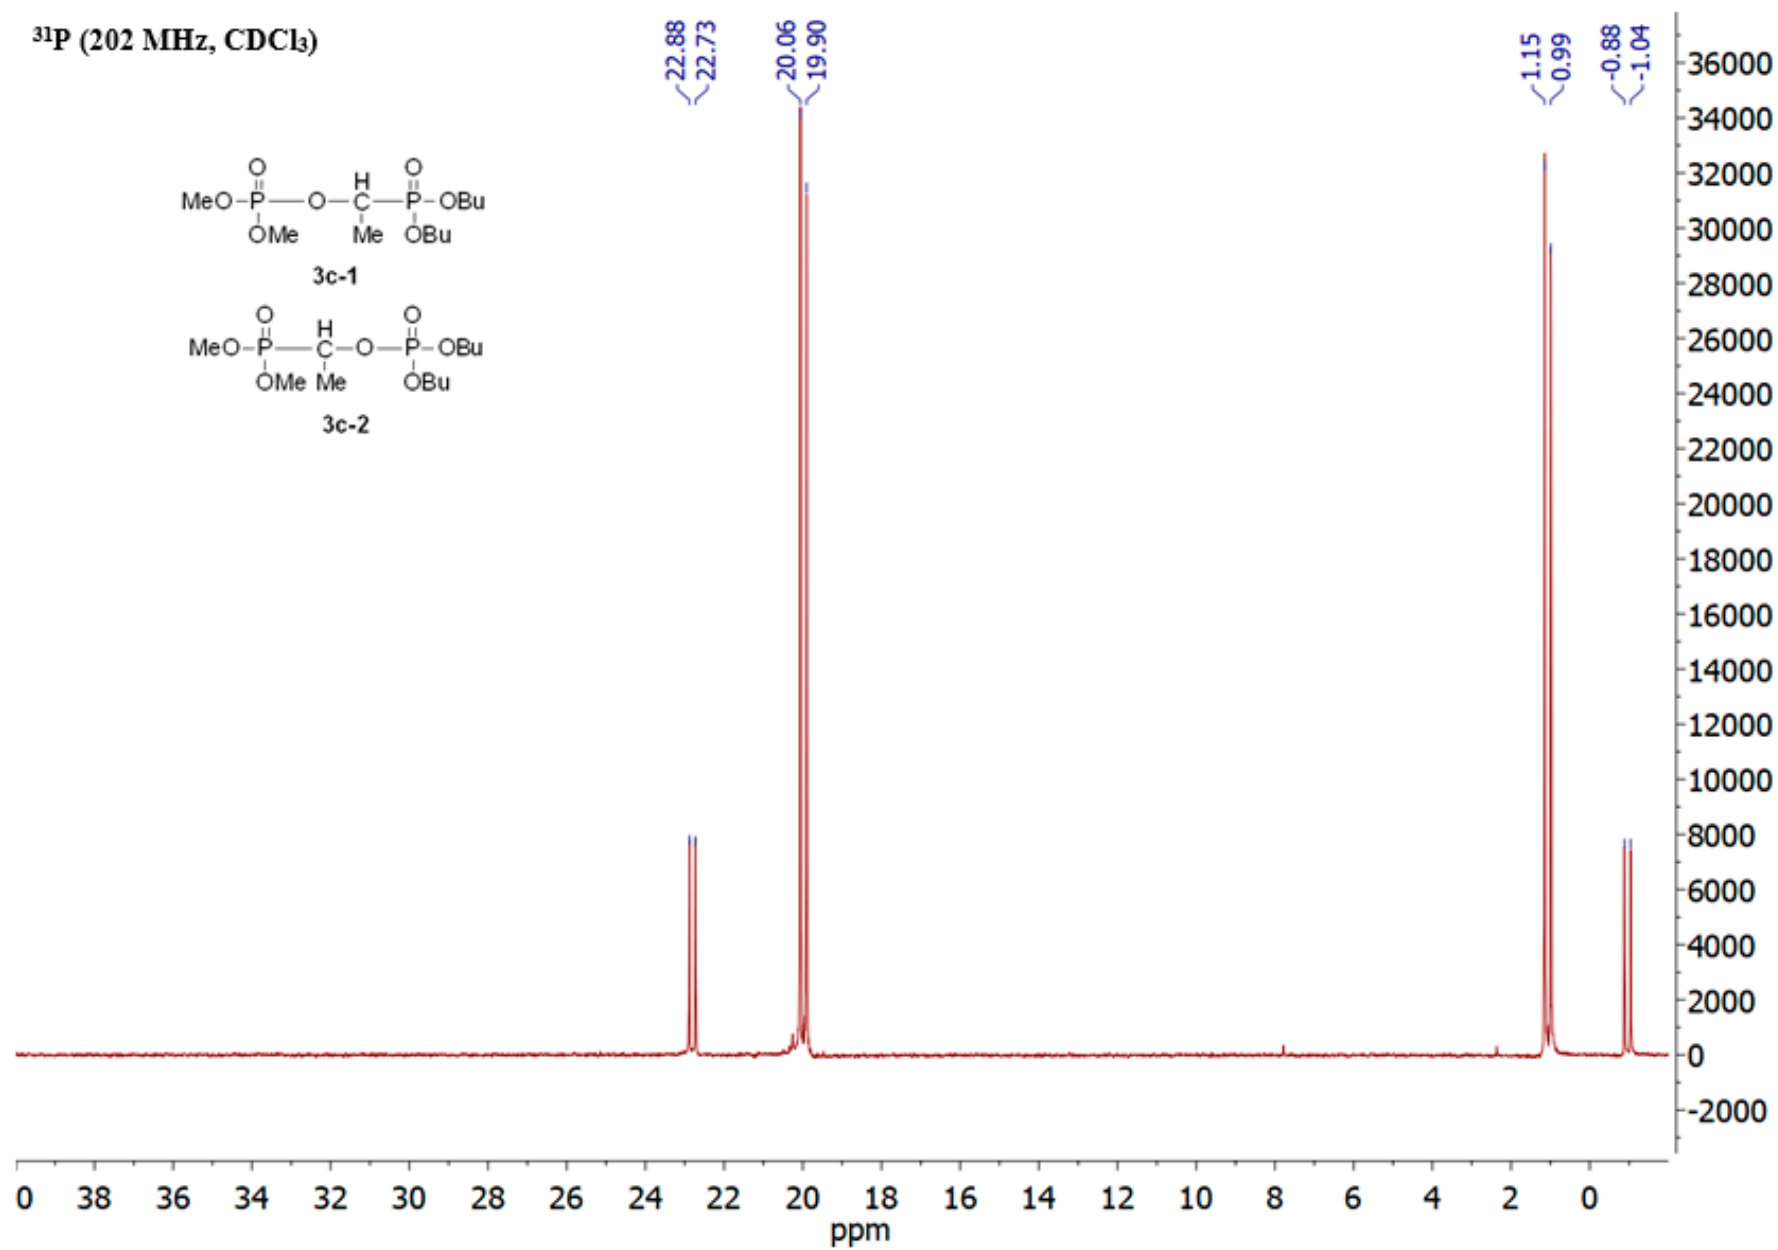

$^{13}\text{C}$  (126 MHz,  $\text{CDCl}_3$ )

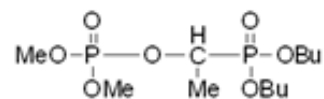

3c-1

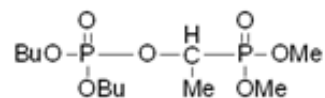

3c-2

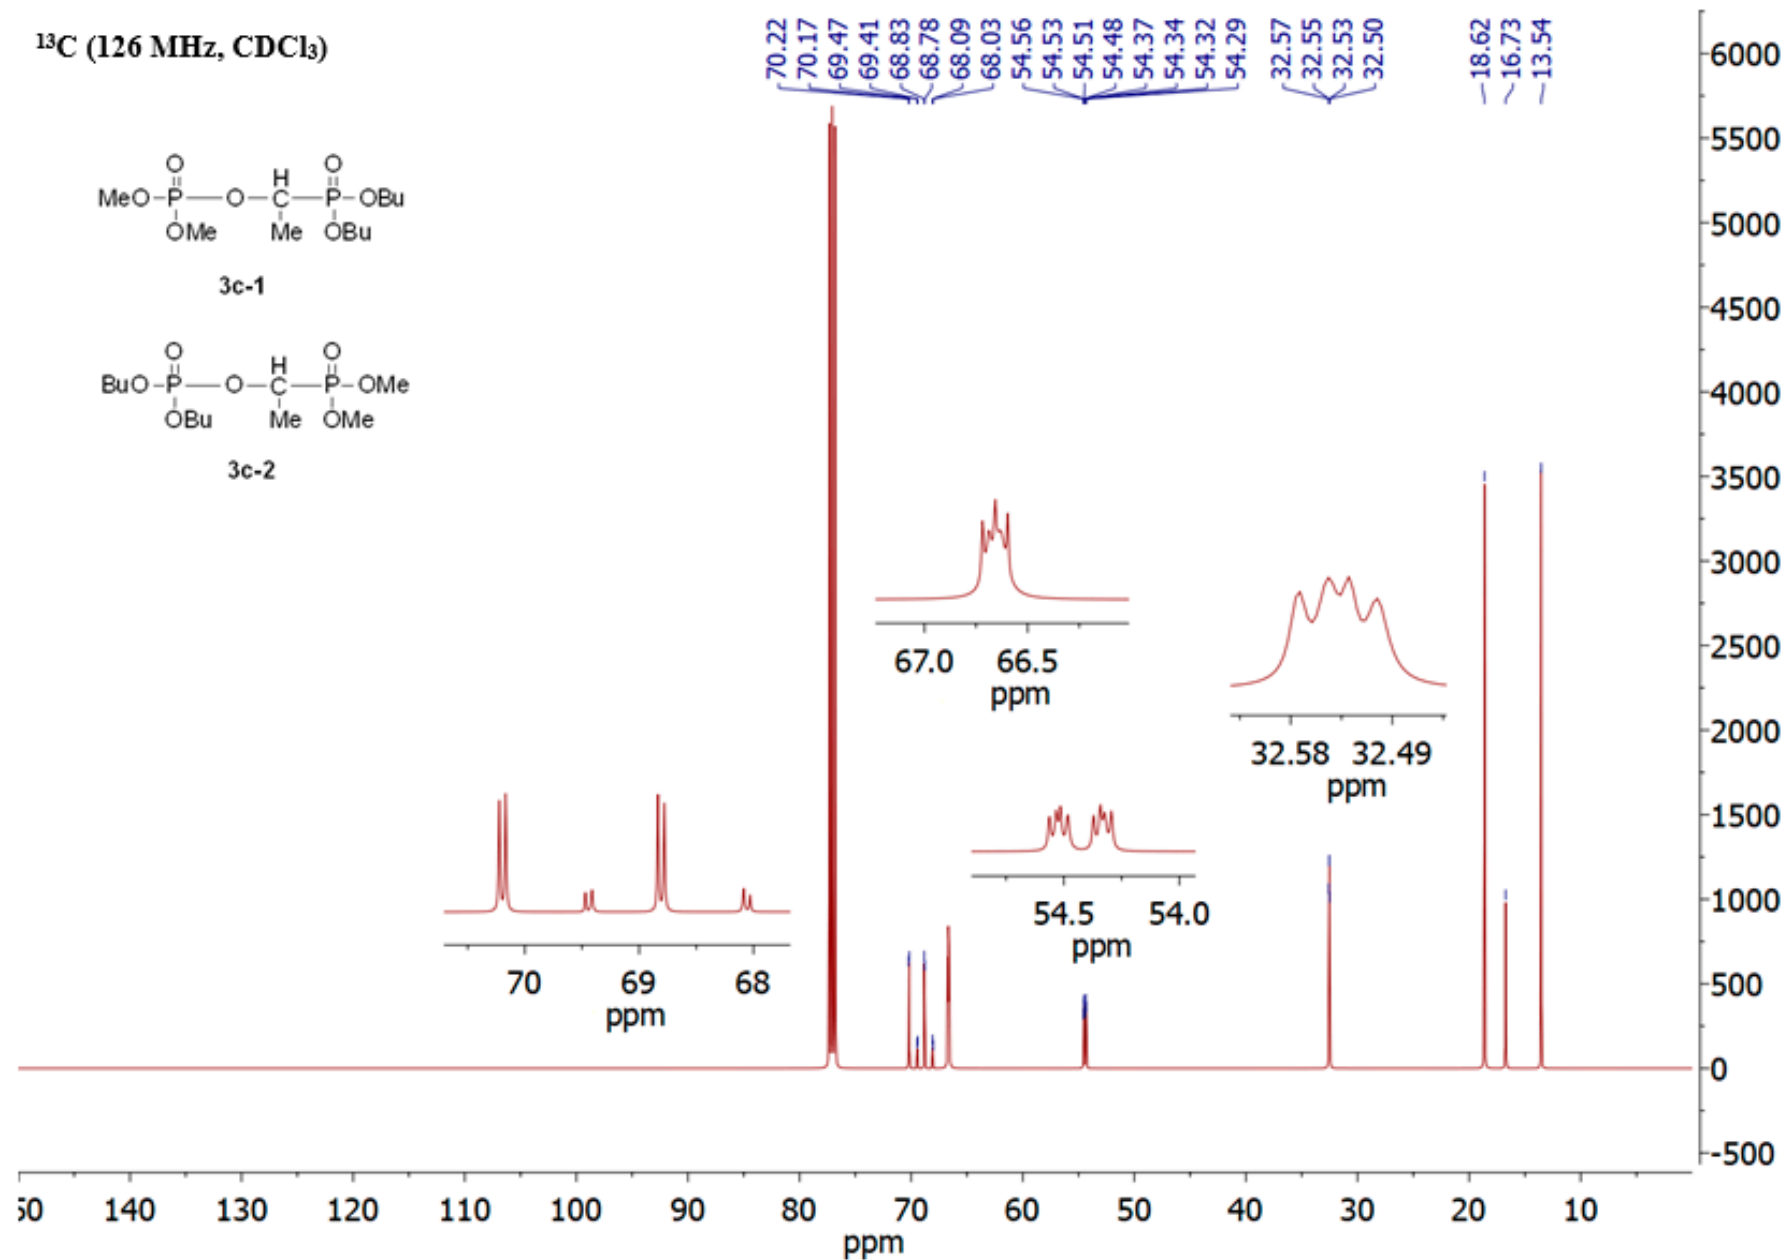

$^1\text{H}$  (500 MHz,  $\text{CDCl}_3$ )

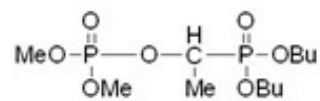

3c-1

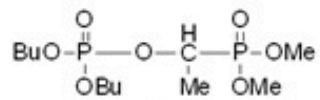

3c-2

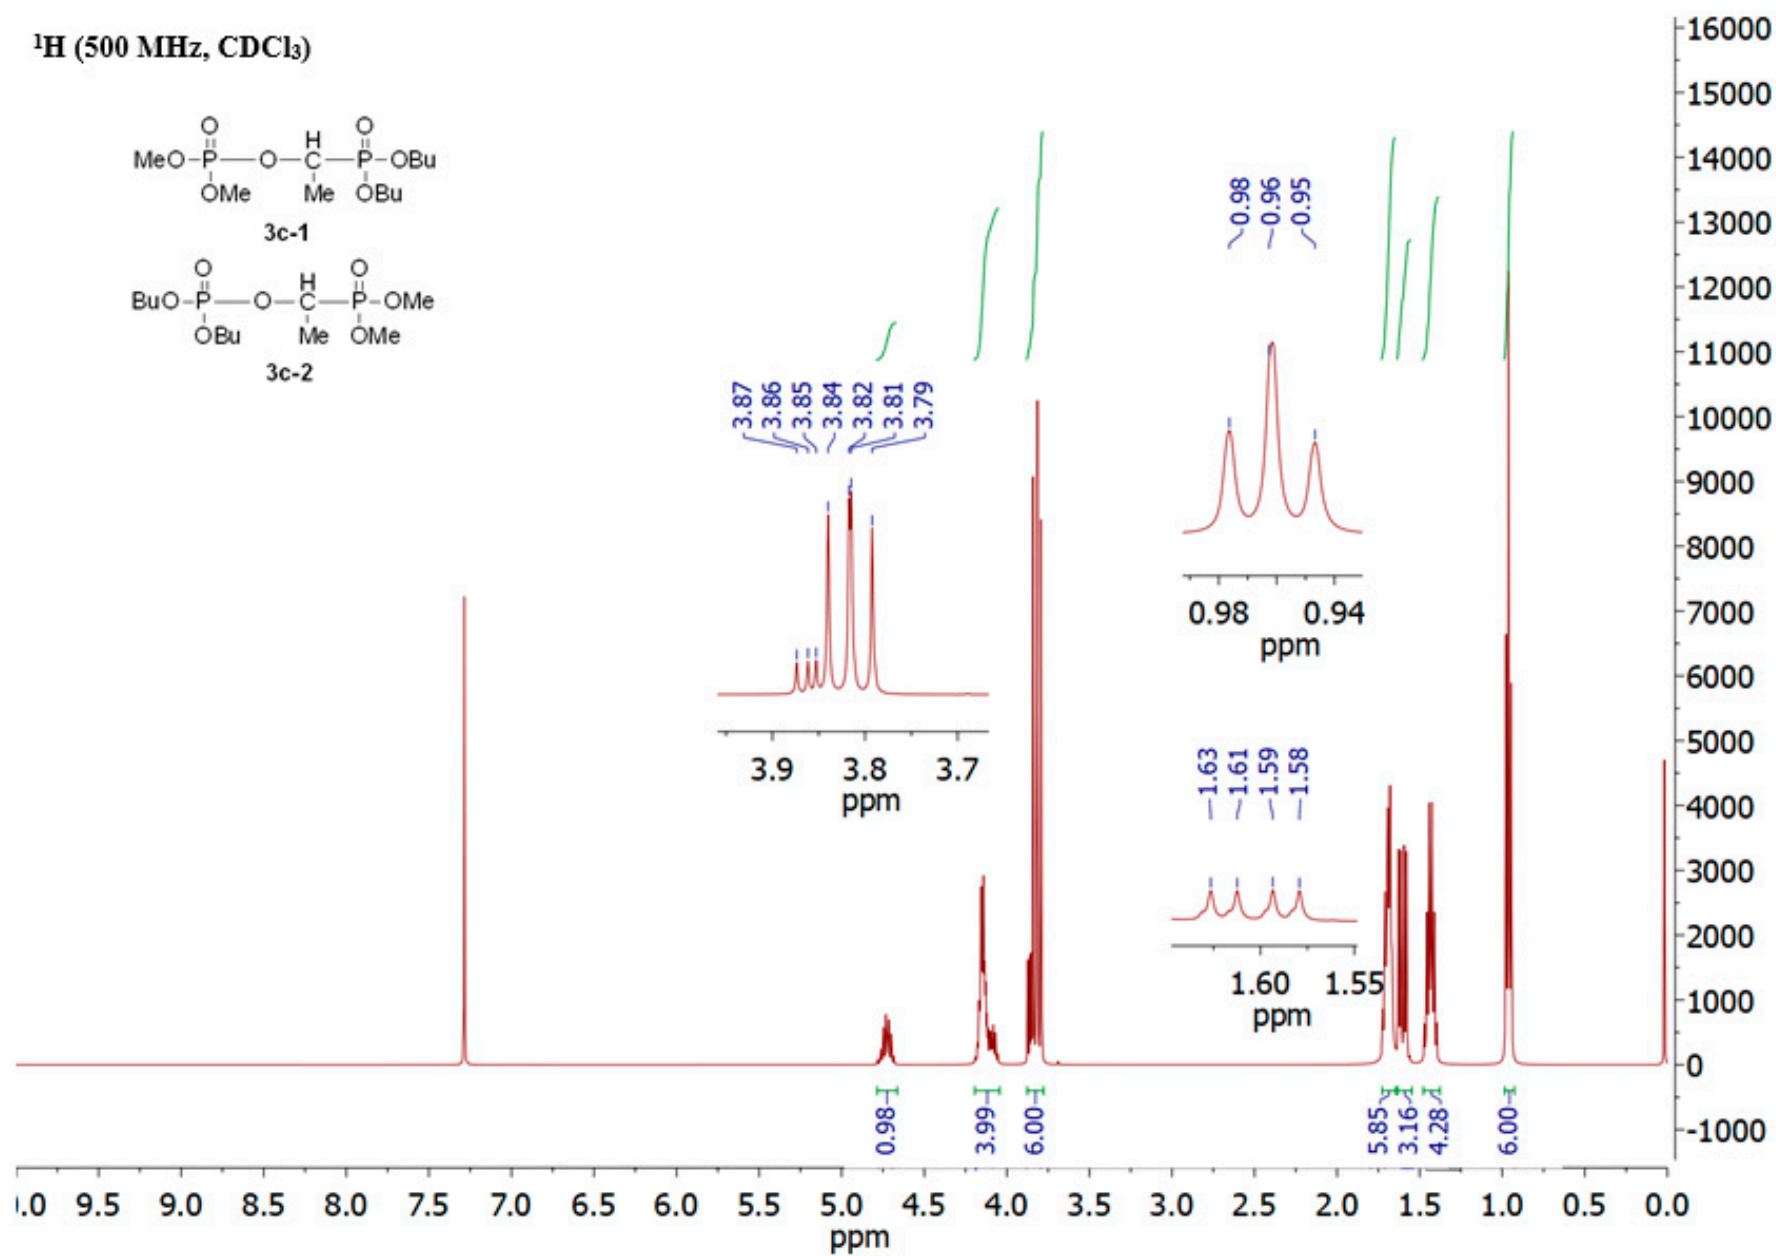



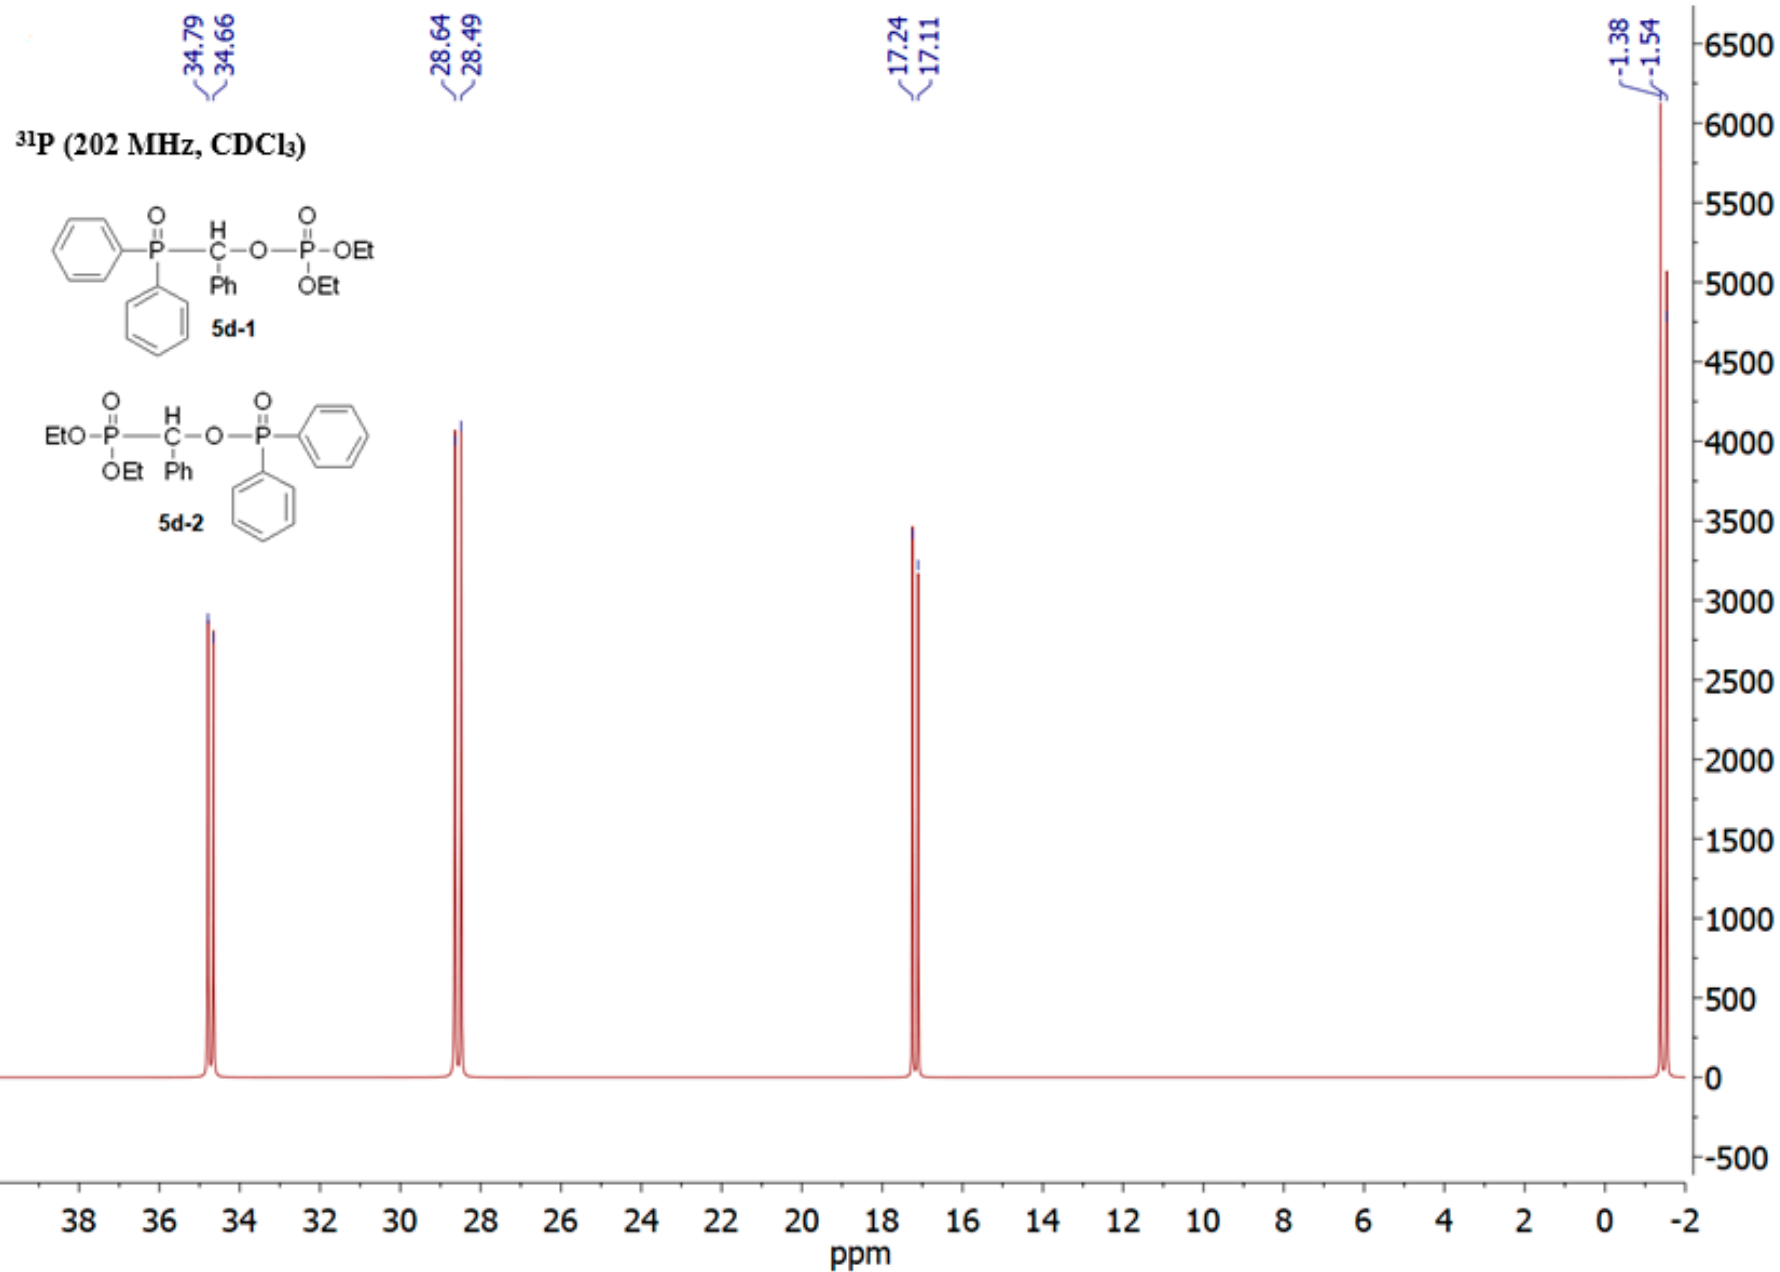

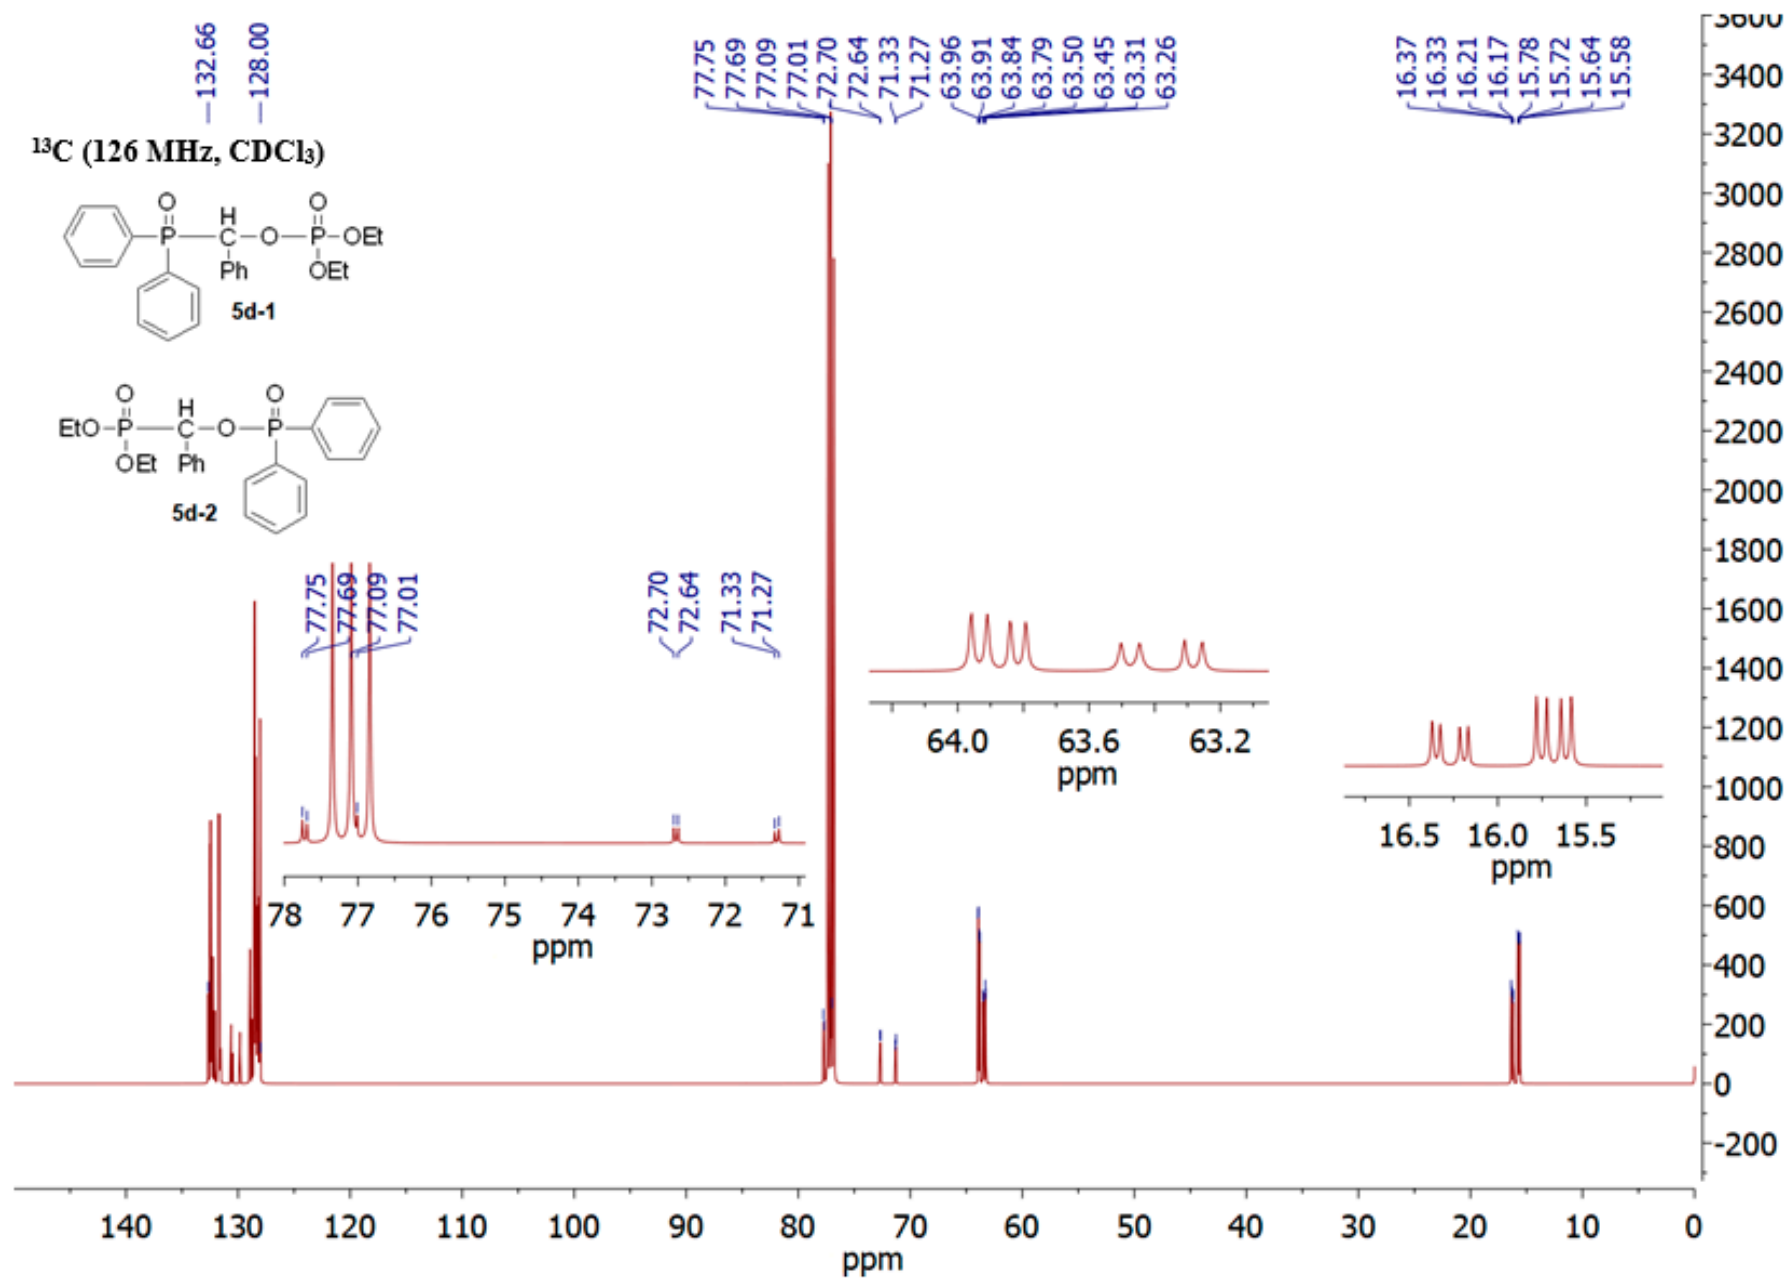

$^1\text{H}$  (500 MHz,  $\text{CDCl}_3$ )

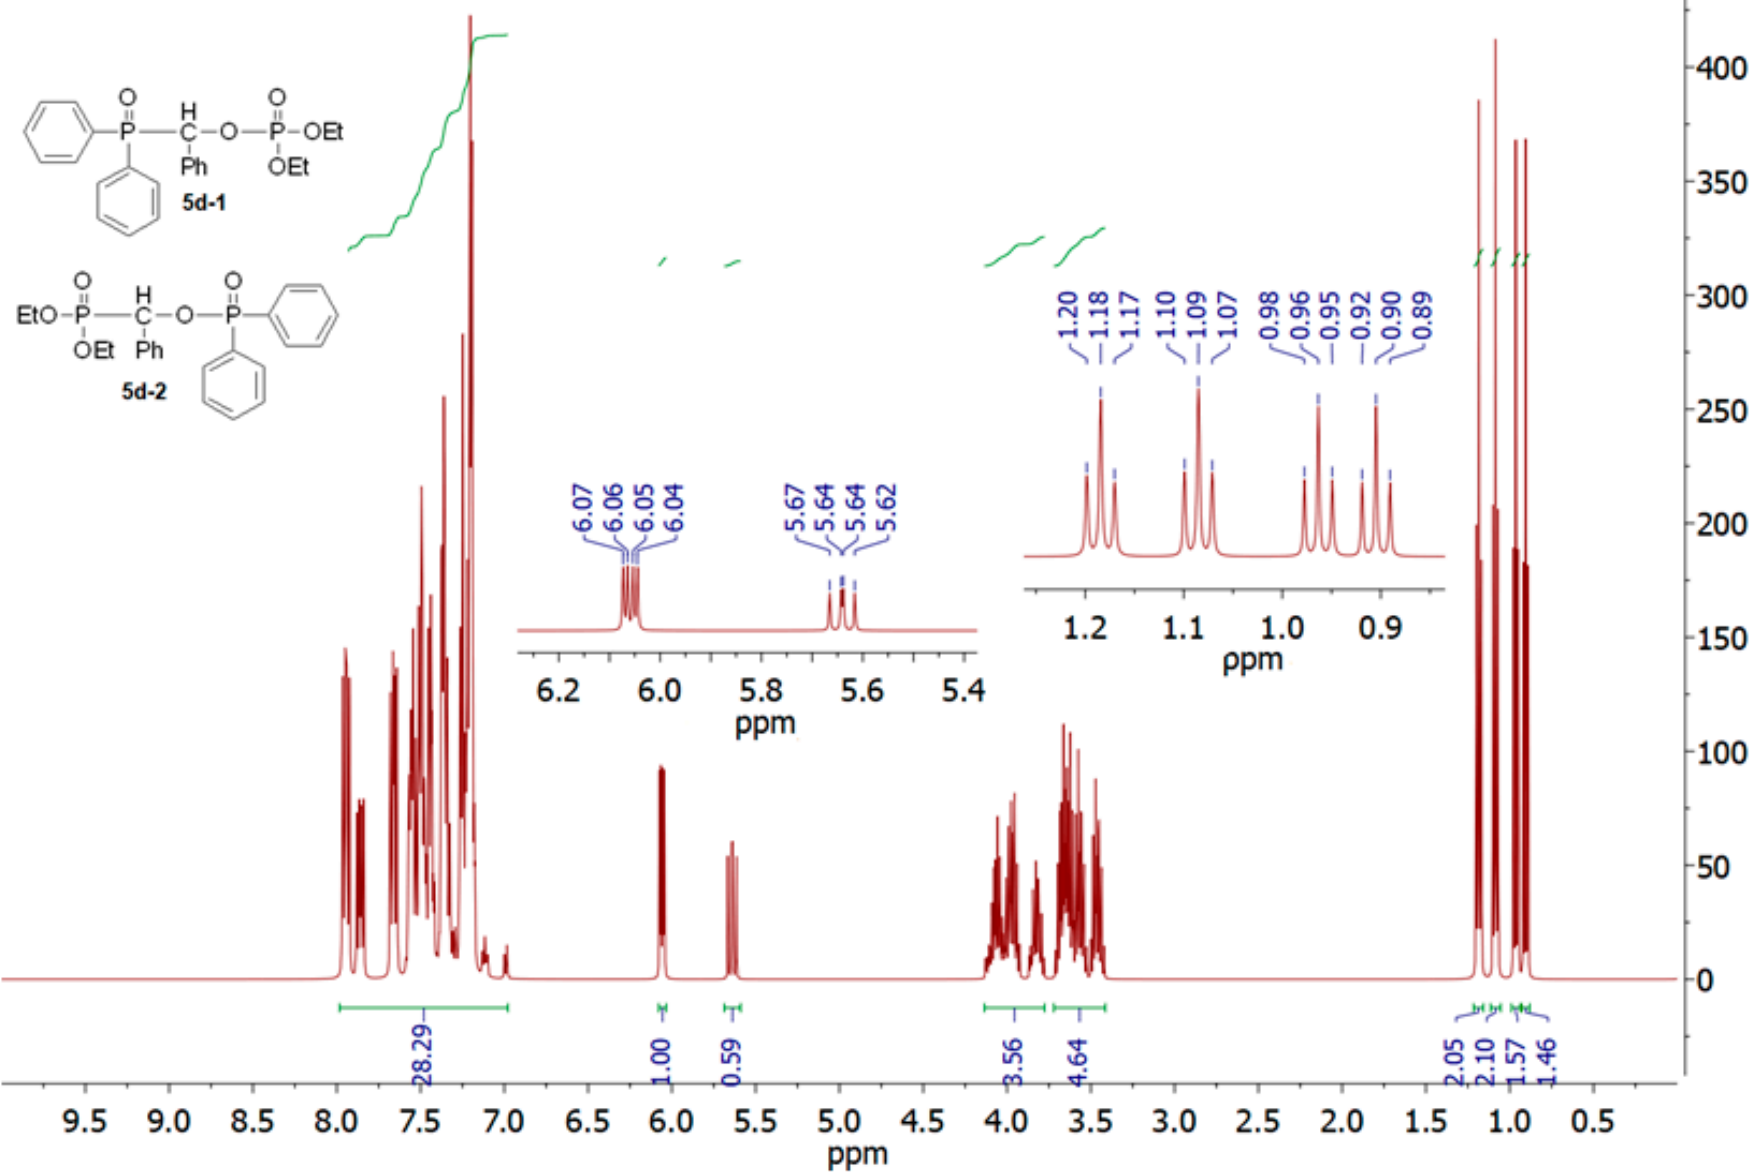

$^{31}\text{P}$  (202 MHz,  $\text{CDCl}_3$ )

29.12  
28.97

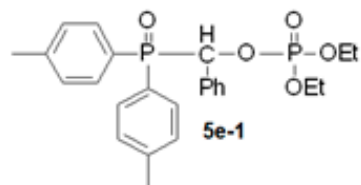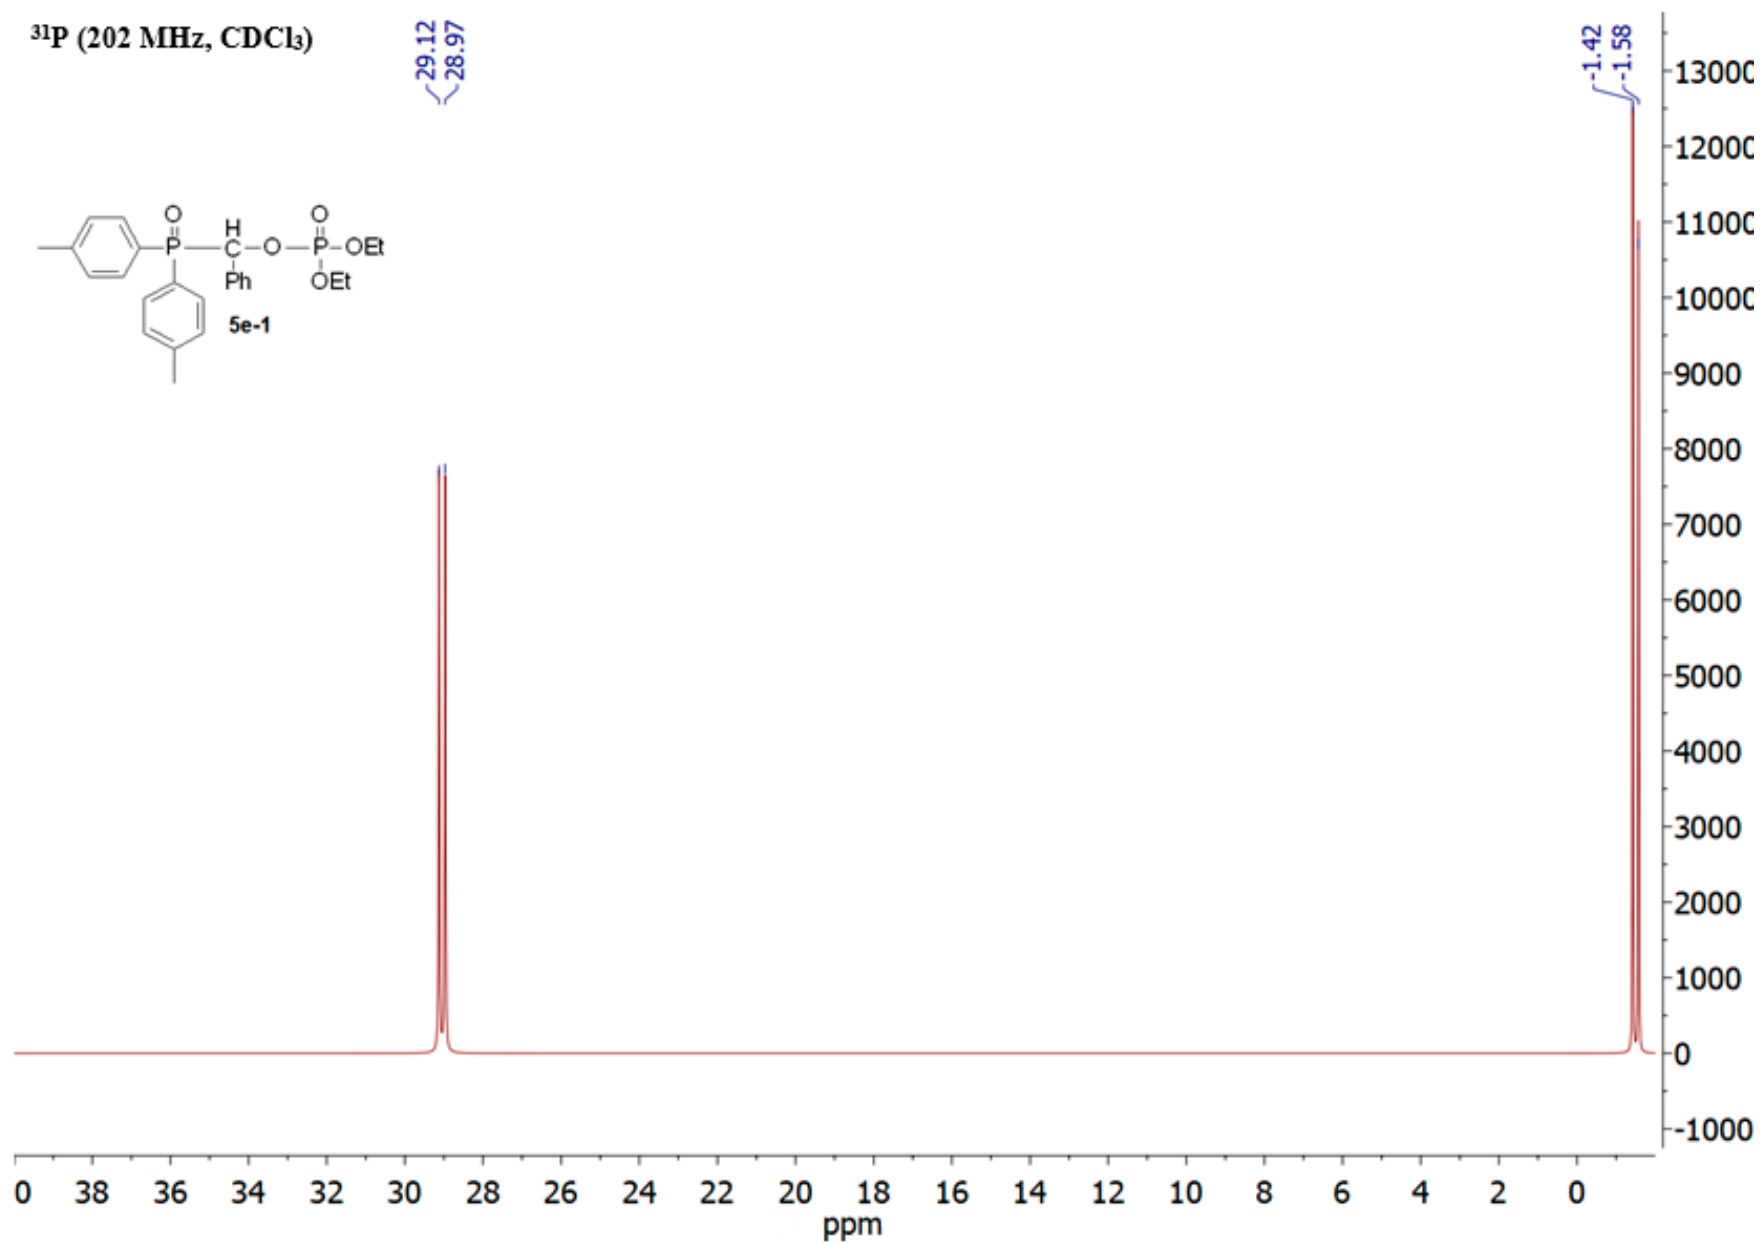

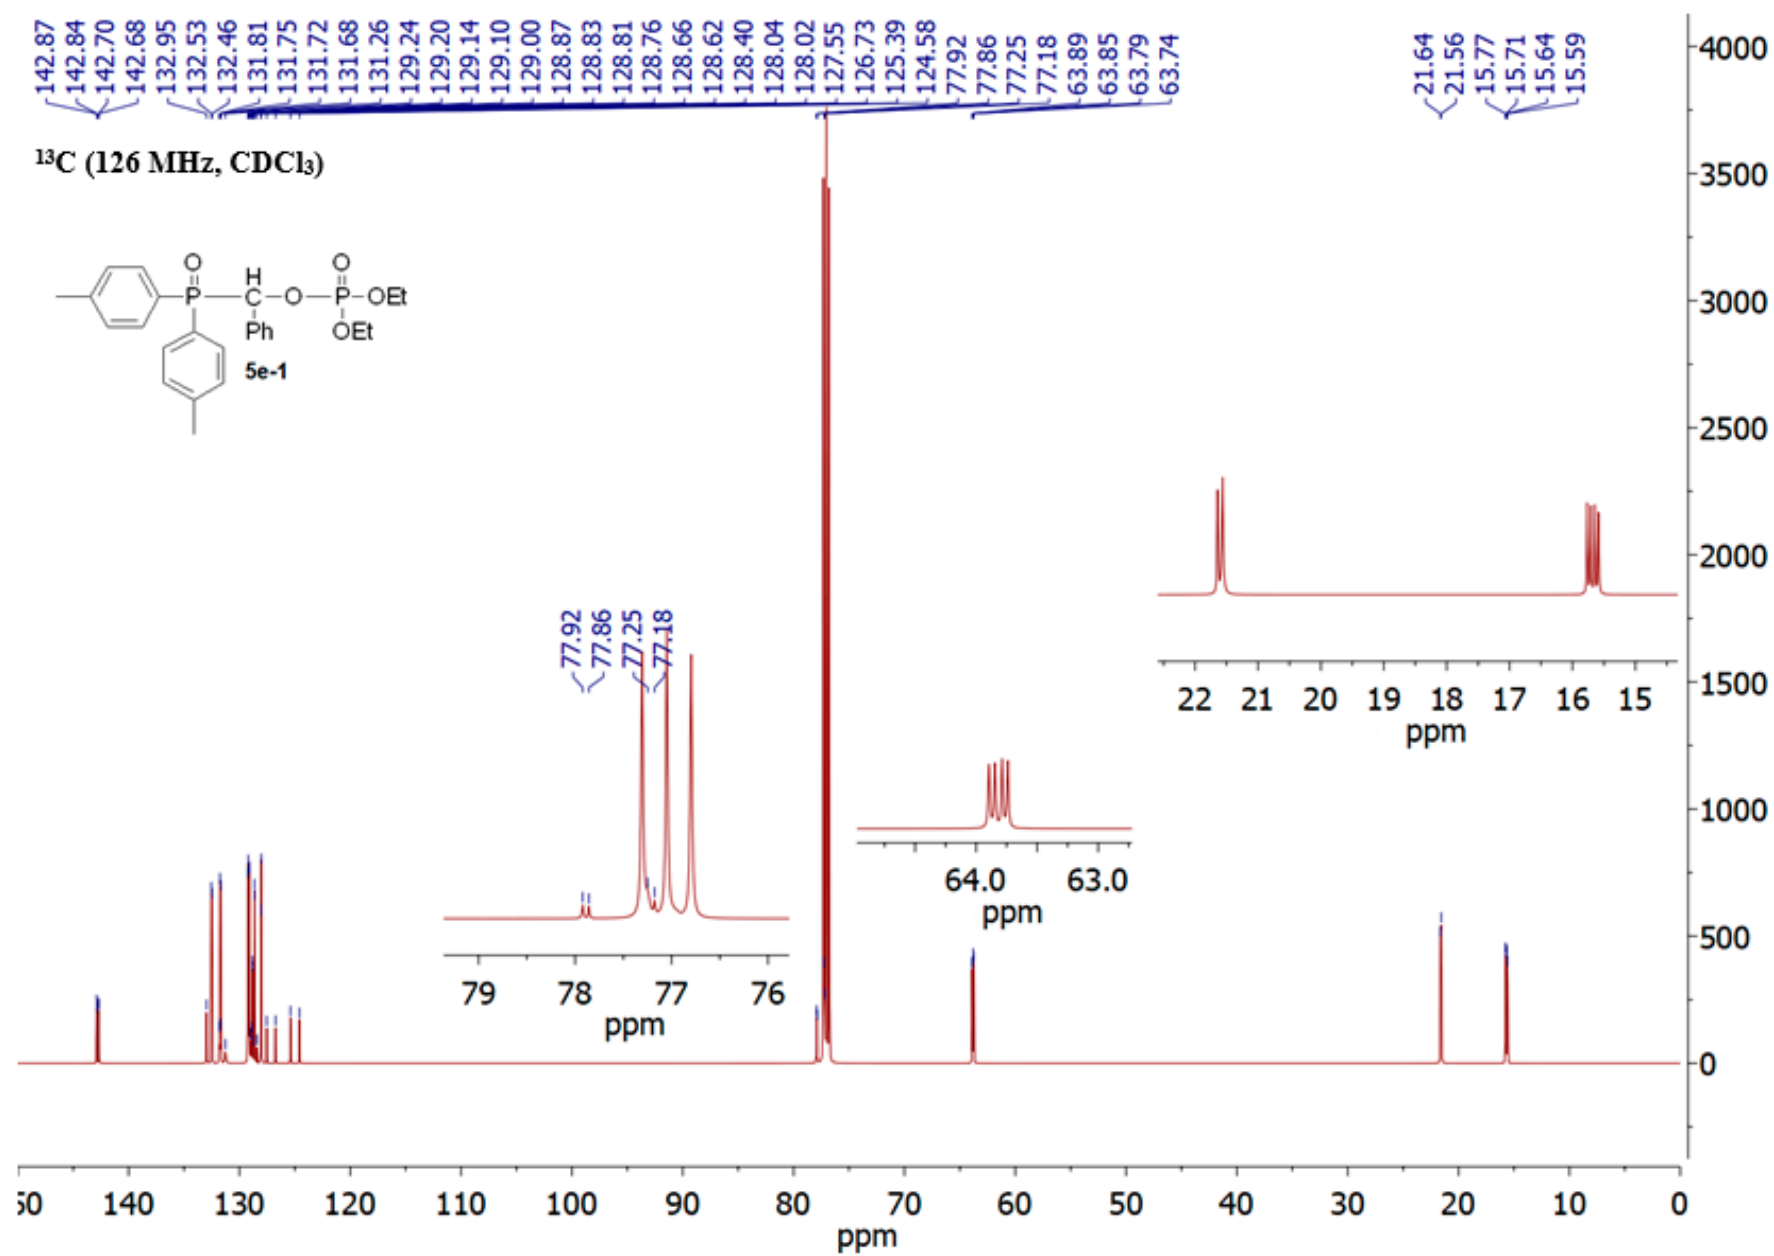

$^1\text{H}$  (500 MHz,  $\text{CDCl}_3$ )

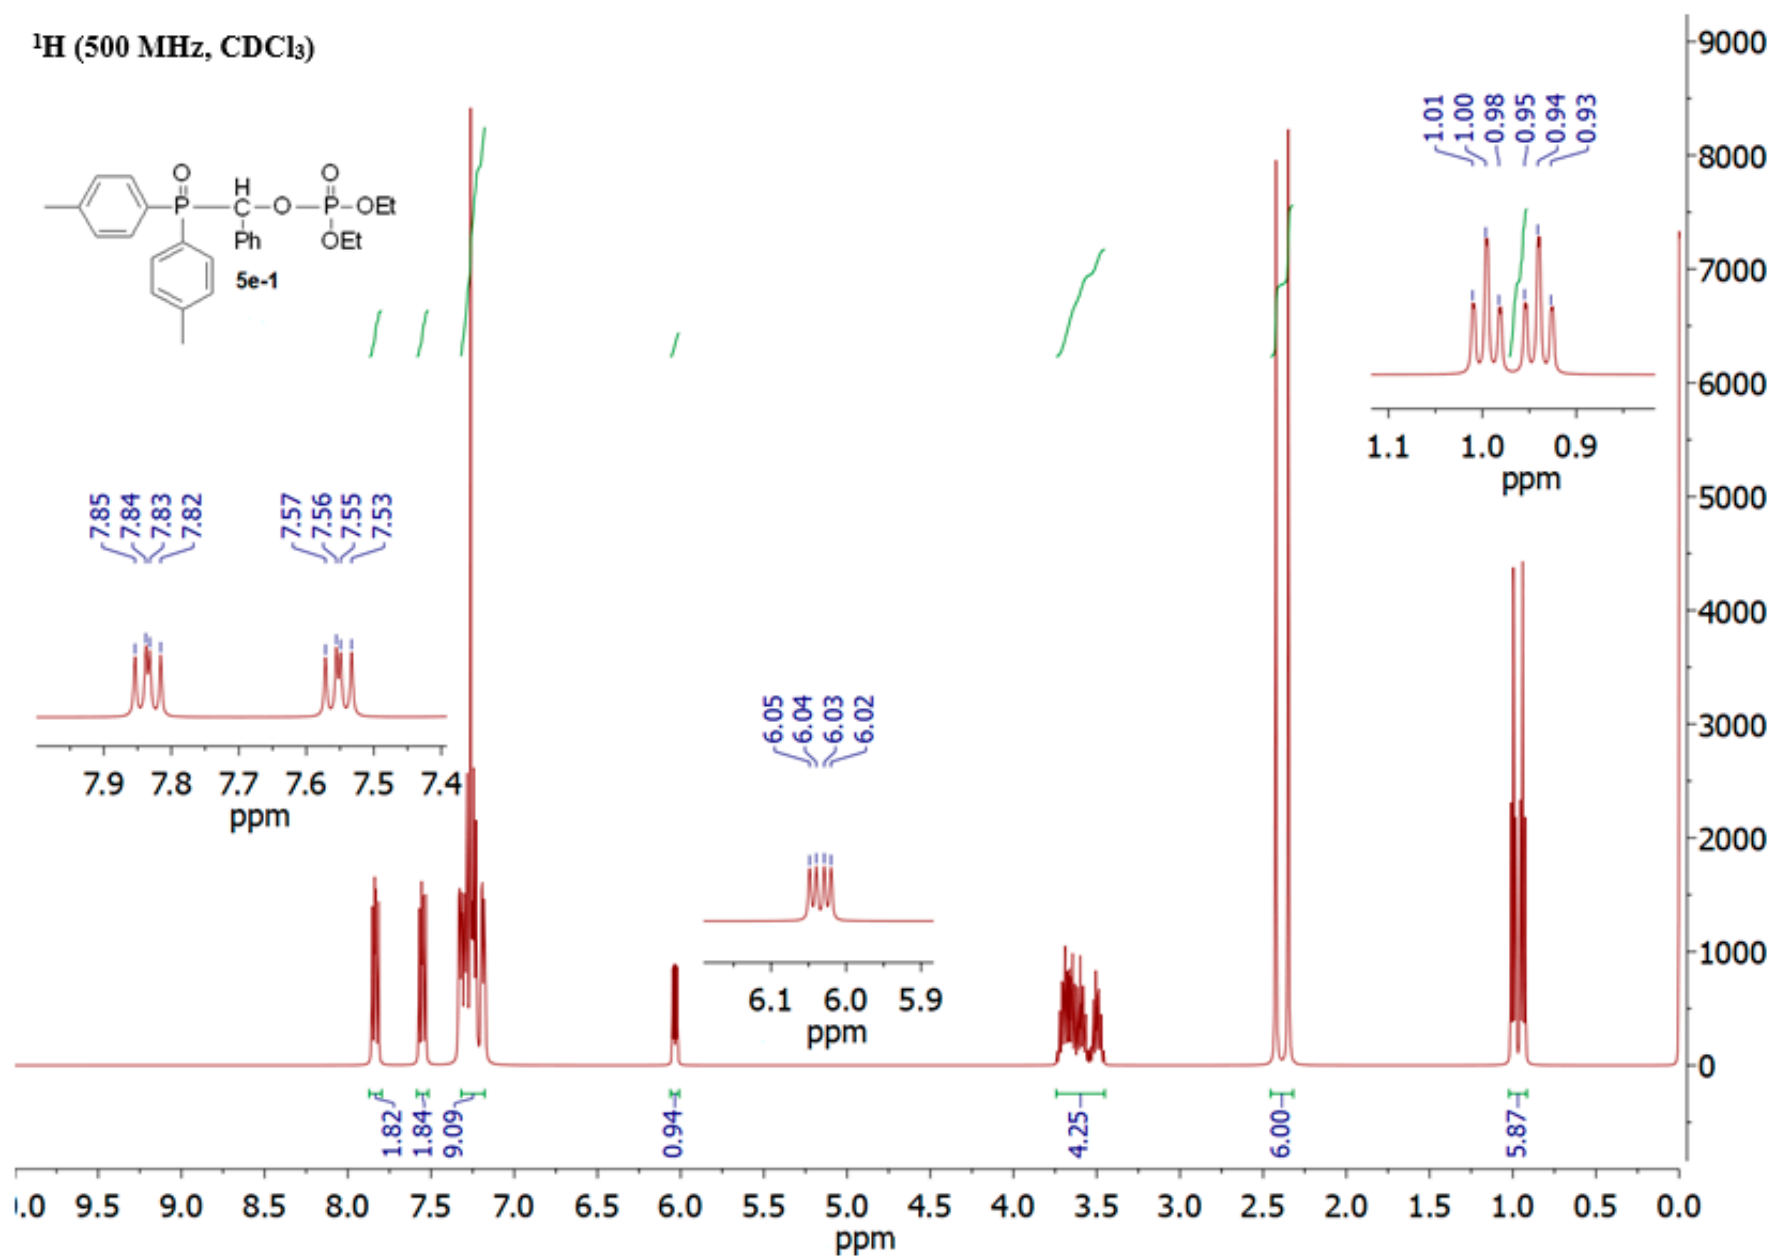

$^{31}\text{P}$  (202 MHz,  $\text{CDCl}_3$ )

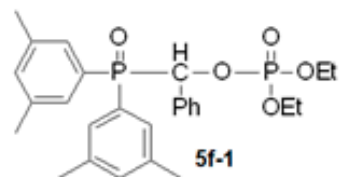

5f-1

29.10  
28.95

-1.19  
-1.34

16000  
15000  
14000  
13000  
12000  
11000  
10000  
9000  
8000  
7000  
6000  
5000  
4000  
3000  
2000  
1000  
0  
-1000

0 38 36 34 32 30 28 26 24 22 20 18 16 14 12 10 8 6 4 2 0

ppm

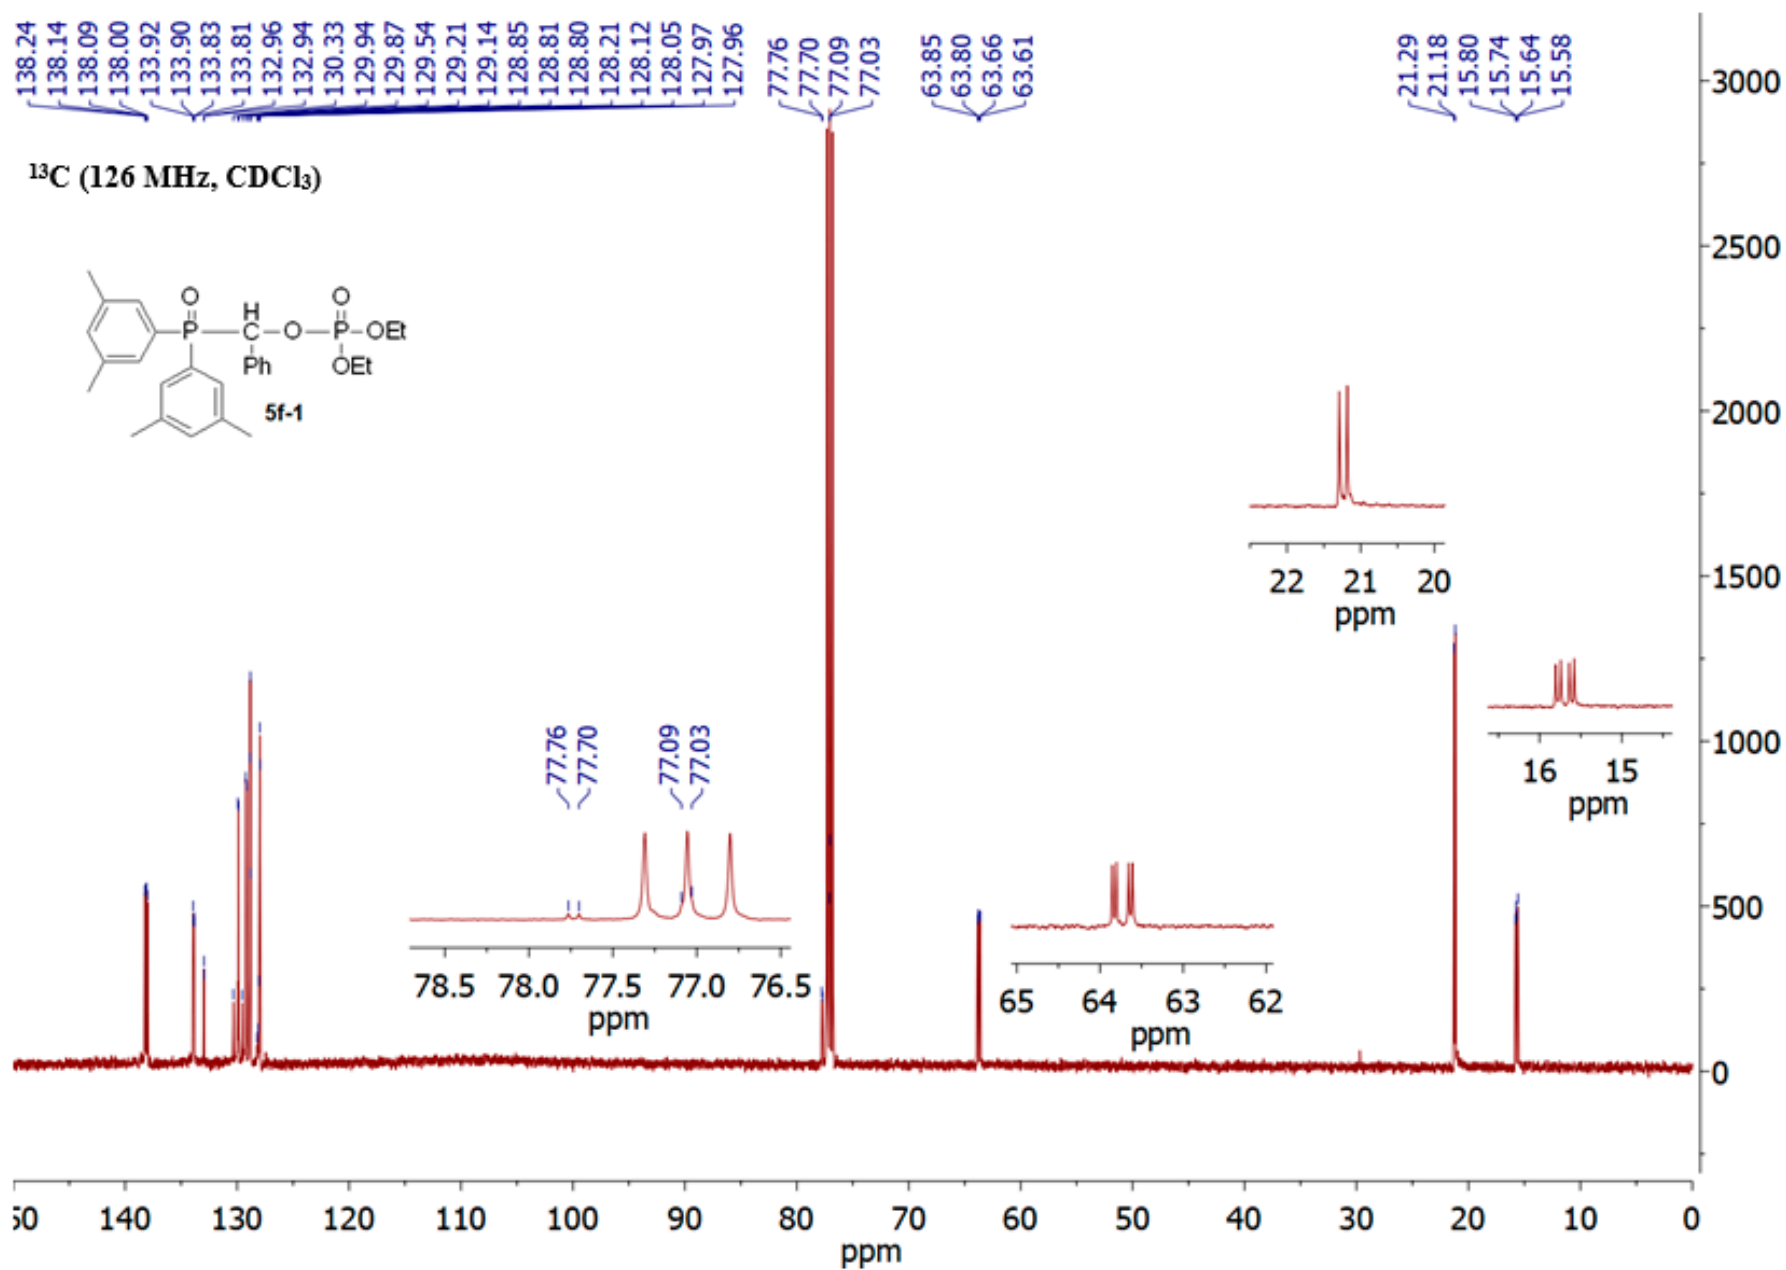



$^1\text{H}$  (500 MHz,  $\text{CDCl}_3$ )

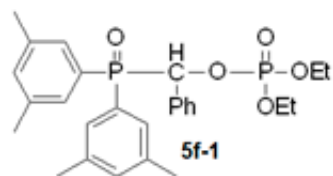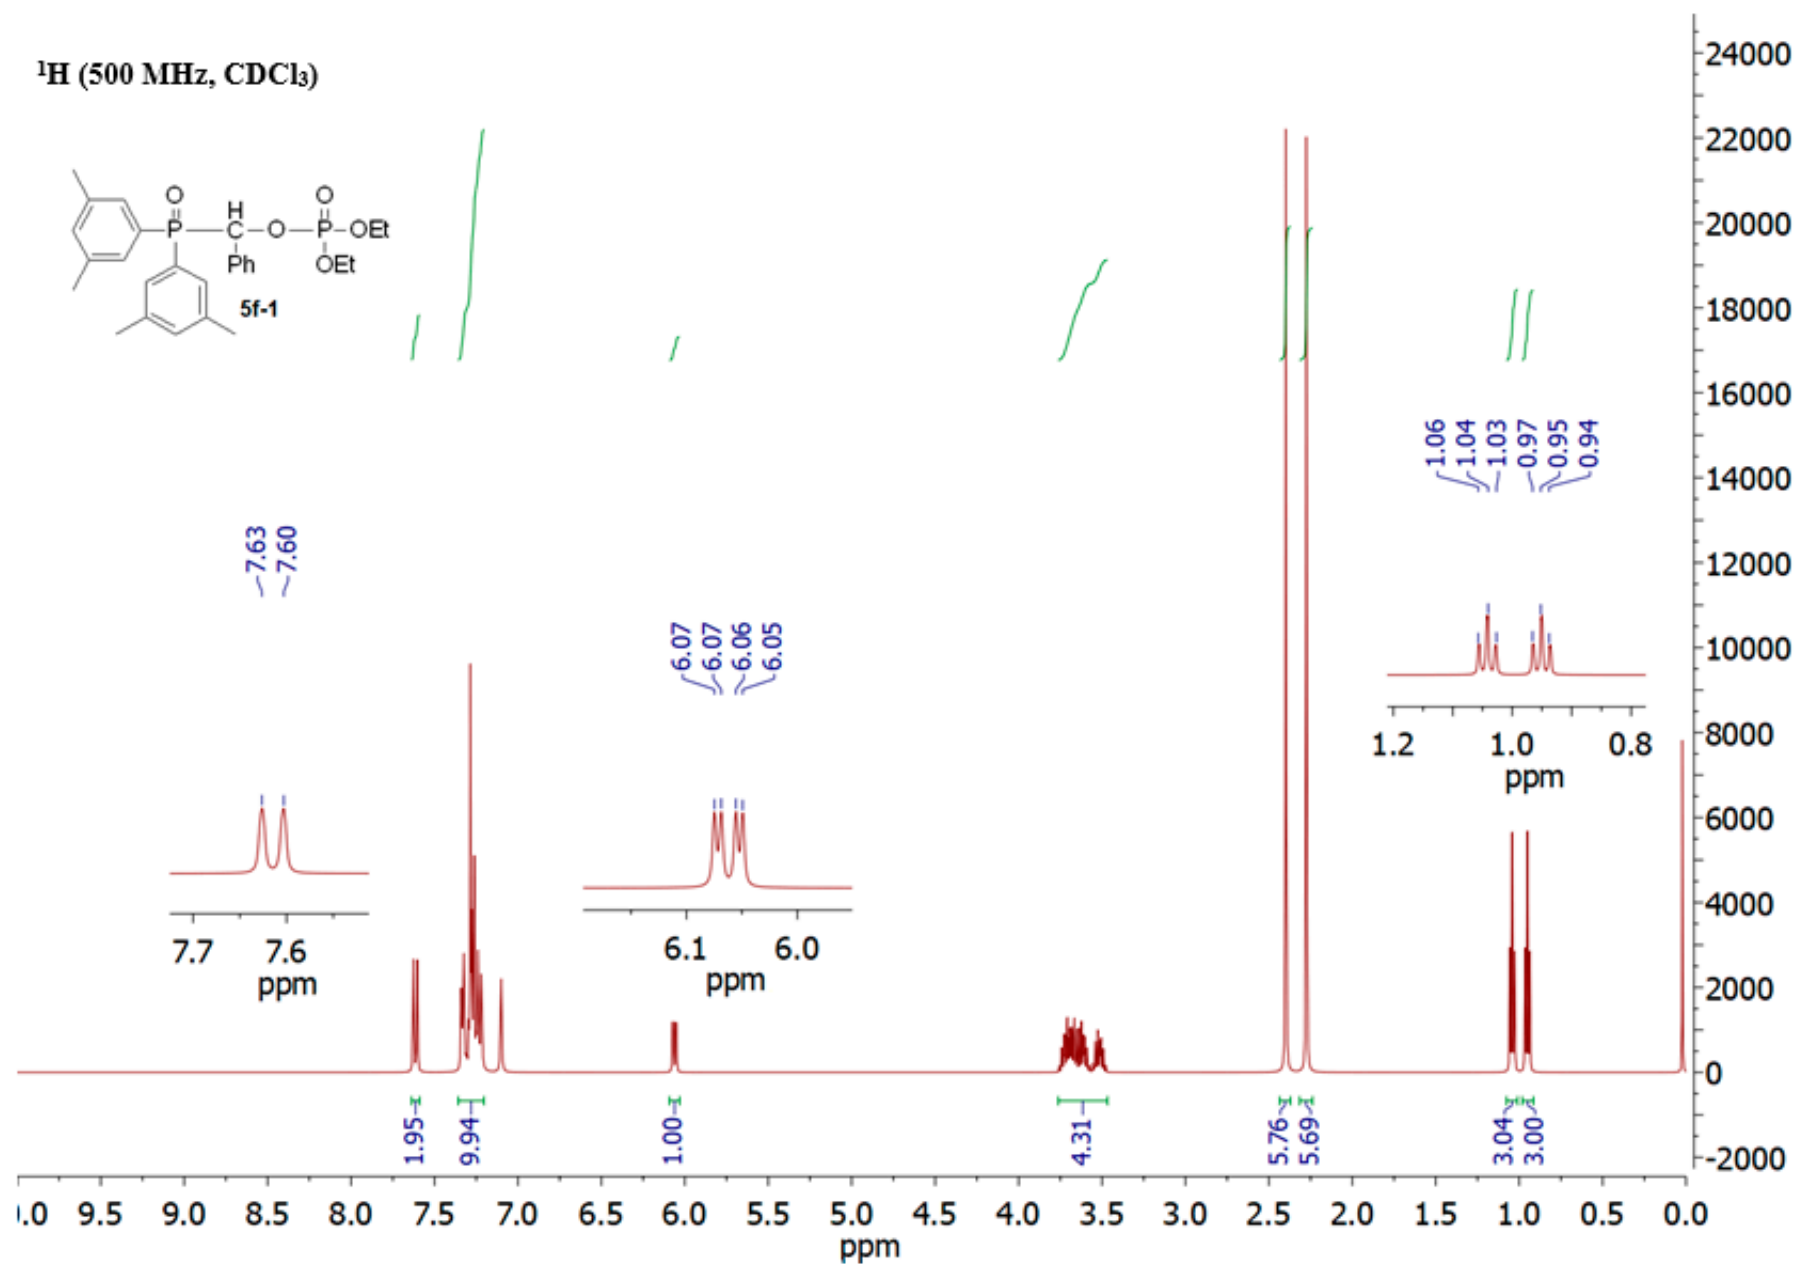

Supplement: s1 [file s1]
